# Supplementary material for: Enantioselective direct, base-free hydrogenation of ketones by a manganese amido complex of a homochiral, unsymmetrical P–N–P′ ligand
Source: Royal Society of Chemistry journal article supplement (doi:10.1039/d1cy00446h), 2021-01-01
Supplement: d1cy00446h1.pdf [file d1cy00446h1.pdf]

Supplementary Information for:

## Enantioselective direct, base-free hydrogenation of ketones by a manganese amido complex of a homochiral, unsymmetrical P-N-P' ligand

Chris S. G. Seo, Brian T. H. Tsui, Matthew V. Gradiski, Samantha A. M. Smith and Robert H. Morris\*

Department of Chemistry, University of Toronto, 80 Saint George St., Toronto, Ontario, M5S3H6, Canada.

\*E-mail: rmorris@chem.utoronto.ca

### Contents

|                                                                                                                                          |    |
|------------------------------------------------------------------------------------------------------------------------------------------|----|
| General comments.....                                                                                                                    | 4  |
| Synthesis of manganese complex <b>4</b> .....                                                                                            | 4  |
| Synthesis of manganese amido complex <b>1Mn</b> .....                                                                                    | 6  |
| NMR study of manganese complex <b>1Mn</b> under a hydrogen atmosphere.....                                                               | 9  |
| General procedure for the direct hydrogenation of ketones.....                                                                           | 14 |
| 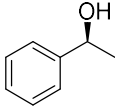 (S)-1-phenylethanol.....                              | 15 |
|  (S)-1-(1-naphthyl)ethanol.....                       | 16 |
|  (S)-1-(2-naphthyl)ethanol.....                       | 17 |
|  (S)-1-(4'-chlorophenyl)ethanol.....                  | 18 |
|  (S)-1-(3',5'-bis(trifluoromethyl)phenyl)ethanol..... | 19 |
|  (S)-1-(4'-methylphenyl)ethanol.....                  | 20 |
|  (S)-2-pyridylethanol.....                            | 21 |

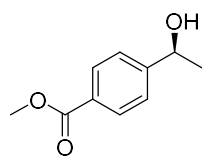

Methyl 4-((1S)-1-hydroxyethyl)benzoate ..... 22

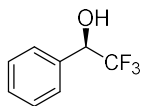

(R)-1-phenyl-2,2,2-trifluoroethanol ..... 23

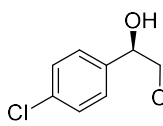

(R)-2-chloro-1-(4-chlorophenyl)ethan-1-ol ..... 24

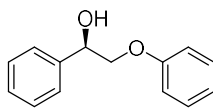

2-phenoxy-1-phenylethanol ..... 25

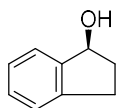

(S)-1-indanol ..... 26

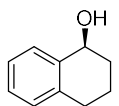

(S)-1-tetralol ..... 27

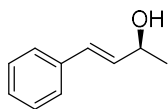

*trans*-4-phenyl-3-buten-2-ol ..... 28

Calculations ..... 29

Energies, transition state wavenumbers, Cartesian coordinates. .... 29

1Mn ..... 29

3TS ..... 31

6Mn ..... 33

H<sub>2</sub> ..... 34

1TS<sup>H<sub>2</sub></sup> ..... 34

5Mn ..... 36

2TS<sup>H<sub>2</sub></sup> ..... 38

7Mn ..... 40

4TS ..... 42

8Mn ..... 43

Acetophenone ..... 45

TS<sup>S</sup> ..... 46

|                                                 |    |
|-------------------------------------------------|----|
| TS <sup>R</sup> .....                           | 48 |
| MnNH-S-alkoxide .....                           | 50 |
| Mn(S-alkoxide) .....                            | 52 |
| TS <sup>NH-O</sup> .....                        | 54 |
| 1-phenylethanol.....                            | 56 |
| 3,5-bis(trifluoromethyl)acetophenone .....      | 57 |
| TS <sup>S</sup> 3,5-CF <sub>3</sub> .....       | 58 |
| TS <sup>R</sup> 3,5-CF <sub>3</sub> .....       | 60 |
| 1-(3,5-bis(trifluoromethyl)phenyl)ethanol ..... | 62 |
| 1,1,1-trifluoroacetophenone .....               | 63 |
| TS <sup>S</sup> 1,1,1-F <sub>3</sub> .....      | 63 |
| TS <sup>R</sup> 1,1,1-F <sub>3</sub> .....      | 66 |
| 2,2,2-trifluoro-1-phenylethanol.....            | 68 |
| 2-acetylpyridine .....                          | 68 |
| TS <sup>S</sup> Acpy.....                       | 69 |
| TS <sup>R</sup> Acpy .....                      | 71 |
| 1-(2-pyridyl)-ethanol.....                      | 73 |
| 1-indanone.....                                 | 73 |
| TS <sup>S</sup> indanone .....                  | 74 |
| TS <sup>R</sup> indanone .....                  | 76 |
| 1-indanol .....                                 | 78 |
| syn-FeHNNH .....                                | 79 |
| TSFe.....                                       | 80 |
| <i>anti</i> -FeHNNH.....                        | 81 |
| References .....                                | 84 |

## General comments

All manipulations that involved air- or moisture-sensitive materials were performed using Schlenk techniques or a glovebox under an argon or nitrogen atmosphere. All solvents and substrates were degassed and dried using standard procedures prior to all manipulations and reactions unless stated otherwise.<sup>1,2</sup> Deuterated solvents were purchased from Cambridge Isotope Laboratories, INC, and dried over activated molecular sieves in argon or nitrogen glovebox. (1*S*,2*S*)-2-(diphenylphosphino)-1,2-diphenylethylamine was purchased from ACROS Organics and ligand **P-NH-P'** was prepared according to the previous literature.<sup>3</sup>

NMR spectra of the samples that were prepared under argon in degassed solvents were recorded at ambient temperature and pressure unless specified, using a Bruker Advance III 400 MHz, Agilent DD2 500 MHz or Agilent DD2 600 MHz [<sup>1</sup>H (400 MHz, 500 MHz and 600 MHz), <sup>13</sup>C{<sup>1</sup>H} (100 MHz, 125 MHz and 150 MHz) and <sup>31</sup>P{<sup>1</sup>H} (162 MHz, 202 MHz and 243 MHz)]. All NMR spectra shown in **Figure S8-16** were recorded on an Agilent DD2 500 MHz, spectrometer at 25°C and in deuterated toluene. Data for <sup>1</sup>H NMR are reported as follows: chemical shift (δ ppm), multiplicity (s = singlet, d = doublet, t = triplet, q = quartet, m = multiplet, br = broad), coupling constant (Hz), integration. The IR spectra were obtained using a Bruker Alpha IR spectrometer with an ATR platinum-diamond attachment. Elemental analyses were performed using a PerkinElmer 2400 CHN elemental analyzer at the Department of Chemistry at the University of Toronto. The conversions and *ee* for each reaction were obtained either on Shimadzu GC-2014 gas chromatograph equipped with a chiral column (CP Chirasil-Dex CB 25 m x 2.5 mm), using hydrogen gas as the carrier gas and 1,4-di-*tert*-butylbenzene as an external standard, or HPLC analysis performed on an Agilent HP 1100 Series modular system operated by ChemStation LC 3D software, v.10.02. on chiral column DAICEL CHIRALPAK AD-H or OD-H. Enantiomeric purity (reported as % *ee*) was determined by comparison with the racemic assay and calculated as follows:

$$\% ee = [(Area A - Area B)/(Area A + Area B)] \times 100.$$

## Synthesis of manganese complex **4**

P-NH-P' (150 mg, 2.9x10<sup>-1</sup> mmol) and Mn(CO)<sub>5</sub>Br (78.4 mg, 2.9x10<sup>-1</sup> mmol, 1 equiv.) was dissolved in 5 mL toluene, and the reaction mixture was refluxed for 16 h. All volatiles were evaporated off. The residue was taken up in pentane, filtered, and washed with 2x5 mL pentane to afford **4** as yellow solid (155 mg, 76% yield).

<sup>1</sup>H NMR (500 MHz, toluene-d<sub>8</sub>): δ 7.95 (m, 2H), 7.68 (m, 2H), 7.02 (m, 4H), 6.87 (m, 4H), 6.78 (m, 2H), 6.63 (m, 6H), 4.60 (m, 1H), 4.29 (m, 1H), 4.00 (m, 1H), 3.31 (m, 1H), 2.64-2.59 (m, 1H), 2.33 (m, 1H), 2.17 (m, 1H), 1.55 (m, 1H), 1.46-1.24 (m, 12H). <sup>31</sup>P{<sup>1</sup>H} NMR (202 MHz, toluene-d<sub>8</sub>): δ 84.5 (d, *J*<sub>PP</sub> = 92.7 Hz), 81.0 (d, *J*<sub>PP</sub> = 92.7 Hz). <sup>13</sup>C{<sup>1</sup>H} NMR (125 MHz, C<sub>6</sub>D<sub>6</sub>): δ 140.06 (m), 136.67-136.16 (m), 134.45 (m), 133.56 (m), 130.24 (s), 129.55 (s), 128.86 (s), 126.20 (s), 74.06 (m), 55.70 (s), 50.68 (m), 26.30-26.01 (m), 24.12 (m), 19.98-19.90 (m), 18.75 (m), 18.34 (m). FTIR 1944, 1908 cm<sup>-1</sup> ν<sub>(CO)</sub>. HRMS (ESI-TOF, CH<sub>2</sub>Cl<sub>2</sub>) m/z calculated for [C<sub>36</sub>H<sub>41</sub>MnNO<sub>2</sub>P<sub>2</sub>]<sup>+</sup>: 636.1988, found: 636.1992.

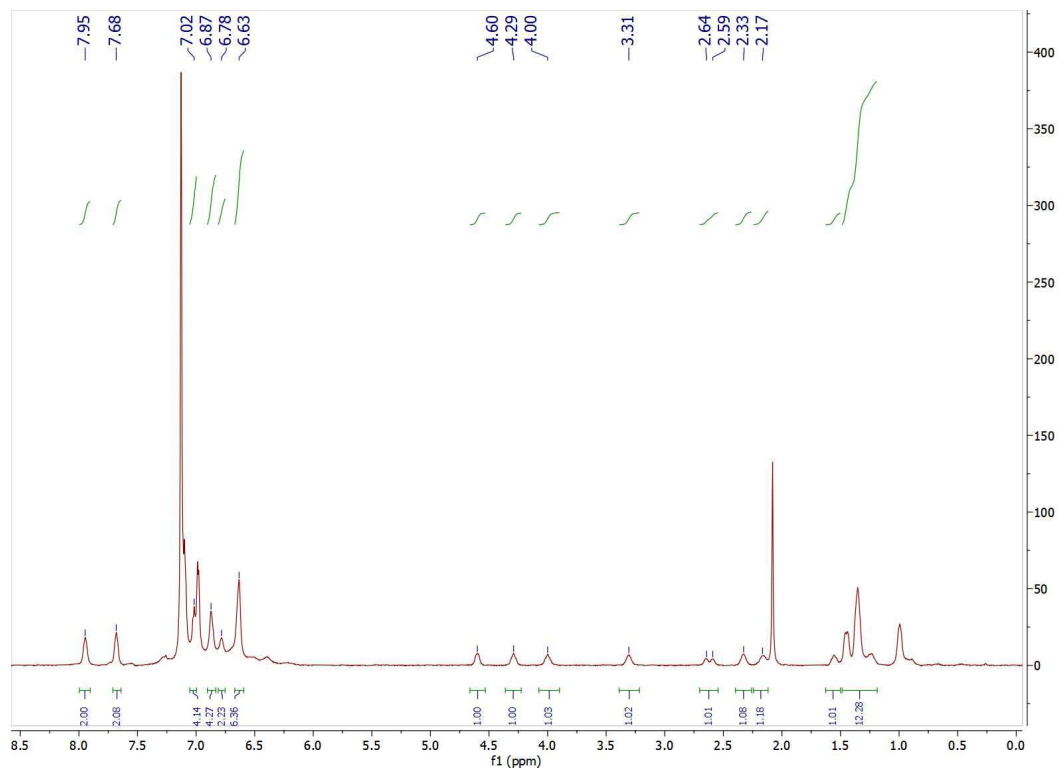

Figure S1.  $^1\text{H}$  NMR spectrum of manganese complex **4** (25°C, 500 MHz, toluene- $d_8$ ).

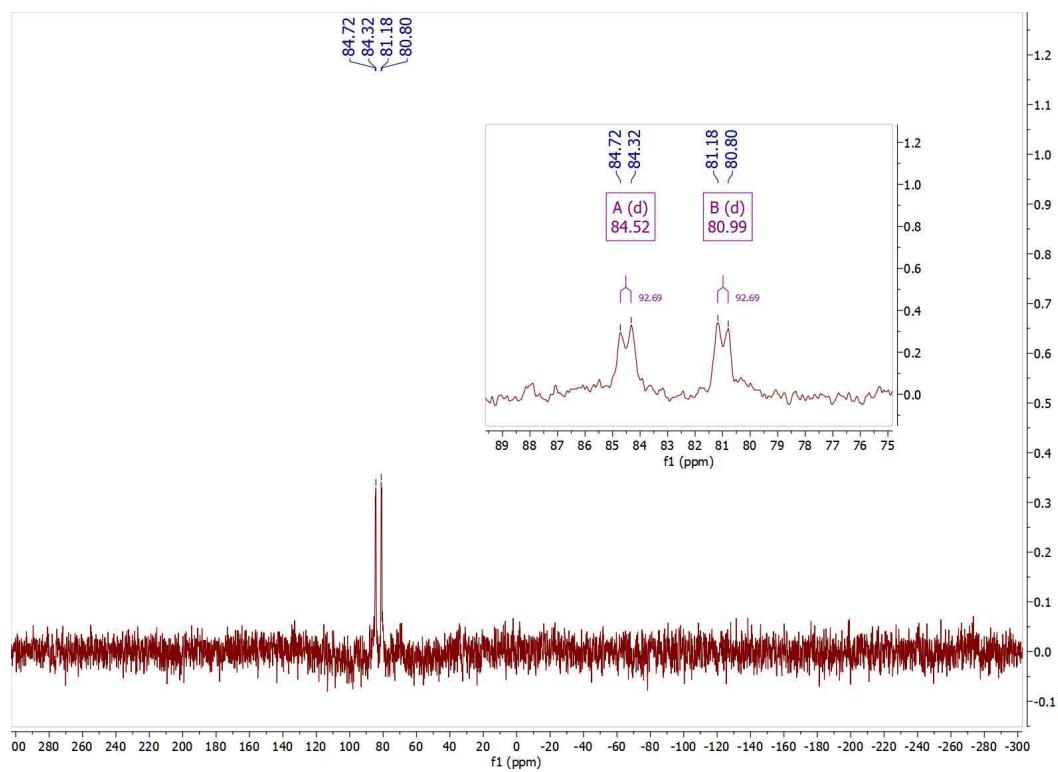

Figure S2.  $^{31}\text{P}\{^1\text{H}\}$  NMR spectrum of manganese complex **4** (25°C, 202 MHz, toluene- $d_8$ ).

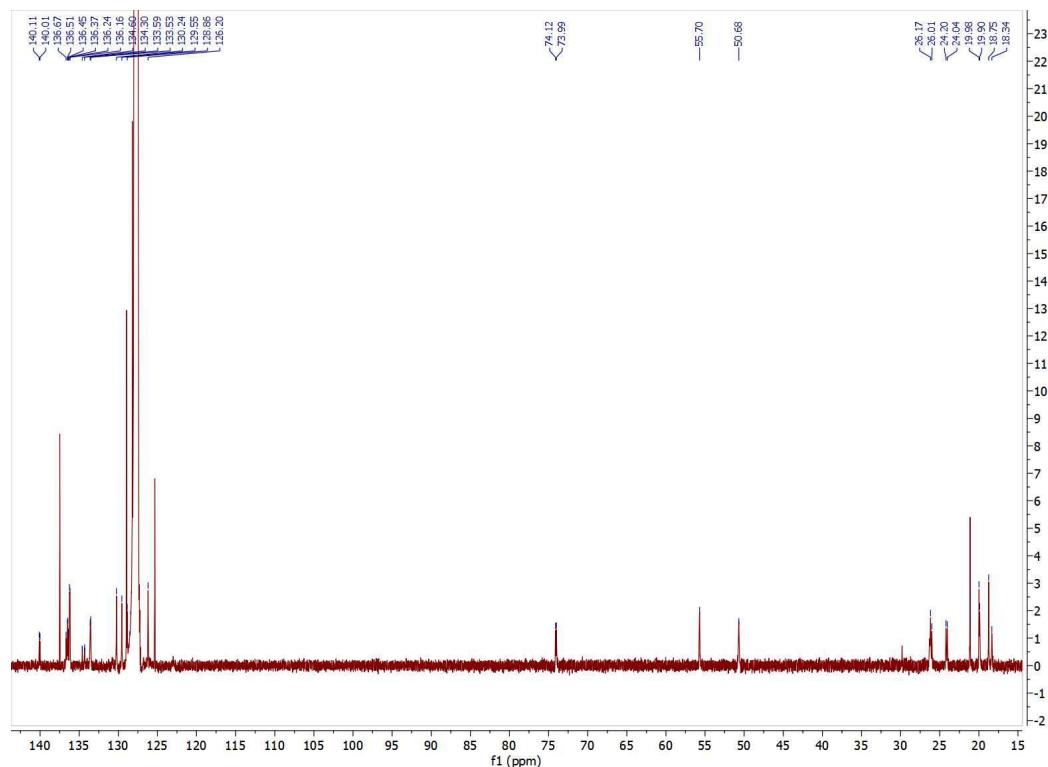

**Figure S3.**  $^{13}\text{C}\{^1\text{H}\}$  NMR spectrum of manganese complex **4** (25°C, 125 MHz,  $\text{C}_6\text{D}_6$ ).

## Synthesis of manganese amido complex **1Mn**

**4** (50 mg,  $7.0 \times 10^{-2}$  mmol) was dissolved in 10 mL THF in a scintillation vial in argon glovebox.  $\text{KO}^t\text{Bu}$  (13.7 mg,  $1.4 \times 10^{-1}$  mmol, 2 equiv.) was added at room temperature while stirring vigorously. The reaction mixture was stirred for 15 minutes and all volatiles were evaporated off. The residue was taken up in *n*-heptane and filtered. The filtrate was concentrated *in vacuo* to afford **1Mn** as a dark red solid (40 mg, 90% yield). The catalyst is air and water sensitive as a solid and in solution. It is stable in room temperature under argon atmosphere for at least 3 weeks.

$^1\text{H}$  NMR (500 MHz,  $\text{C}_6\text{D}_6$ ):  $\delta$  7.93 (t,  $J_{\text{HH}} = 8.6$  Hz, 2H), 7.39-7.29 (m, 2H), 7.11-6.76 (m, 14H), 6.59-6.50 (m, 2H), 4.75 (d,  $J_{\text{HH}} = 8.2$  Hz, 1H), 4.23 (dd,  $J_{\text{HH}} = 8.0, 7.2$  Hz, 1H), 3.24-2.84 (m, 2H), 2.44-2.04 (m, 2H), 1.62-1.42 (m, 2H), 1.22 (dddd,  $J_{\text{HH}} = 64.5, 51.6, 14.1, 7.0$ , 12H)  $^{31}\text{P}\{^1\text{H}\}$  NMR (202 MHz,  $\text{C}_6\text{D}_6$ ):  $\delta$  110.04 (d,  $J_{\text{PP}} = 96$  Hz), 96.68 (d,  $J_{\text{PP}} = 96$  Hz).  $^{13}\text{C}\{^1\text{H}\}$  NMR (125 MHz,  $\text{C}_6\text{D}_6$ ):  $\delta$  145.64 (d,  $J^1_{\text{CH}} = 11.4$  Hz), 138.37 (d,  $J^1_{\text{CH}} = 7.8$  Hz), 135.59 (s), 135.53 (s), 135.14 (d,  $J^1_{\text{CH}} = 10.6$  Hz), 134.88 (s), 134.58 (s), 133.12 (d,  $J^1_{\text{CH}} = 9.9$  Hz), 129.95 (s), 129.76-129.69 (m), 127.52 (m), 127.04 (s), 126.65 (s), 85.63-85.42 (m), 62.37-62.30 (m), 62.11-61.93 (m), 26.78 (d,  $J^1_{\text{CH}} = 19.6$  Hz), 26.31 (d,  $J^1_{\text{CH}} = 20.2$  Hz), 23.86-23.77 (m), 18.74-18.63 (m), 18.01-17.93 (m).

**FTIR** 1895, 1782  $\text{cm}^{-1}$   $\nu_{(\text{CO})}$ .

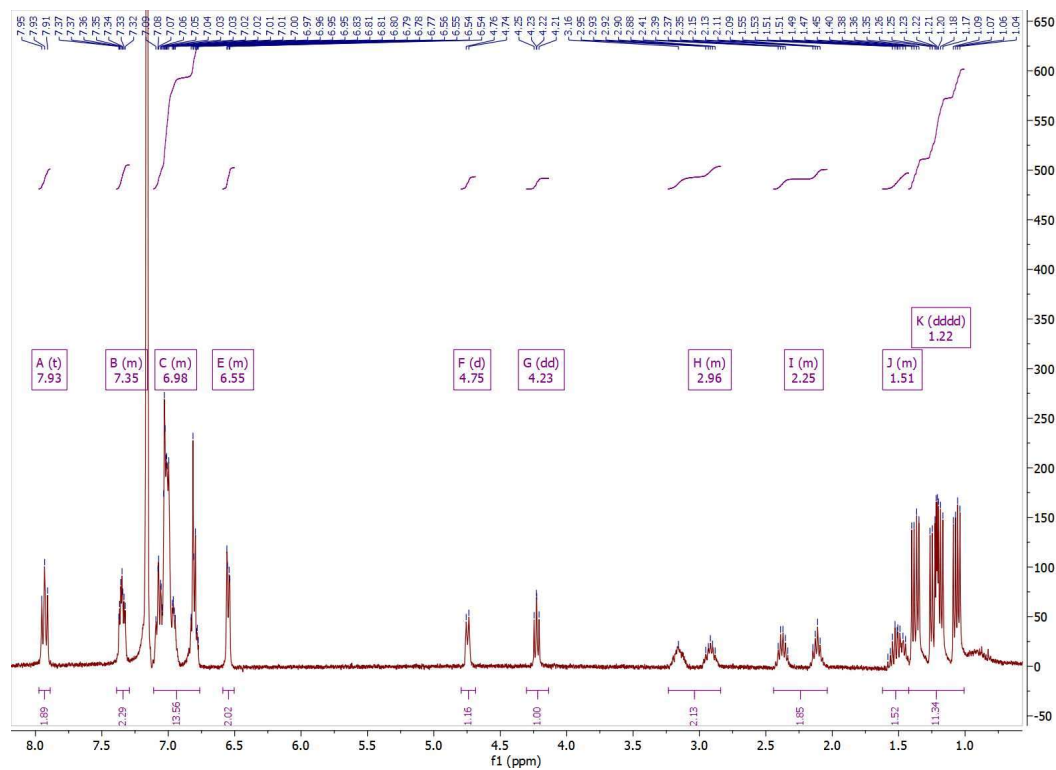

Figure S4.  $^1\text{H}$  NMR spectrum of manganese complex **1Mn** (25°C, 500 MHz,  $\text{C}_6\text{D}_6$ ).

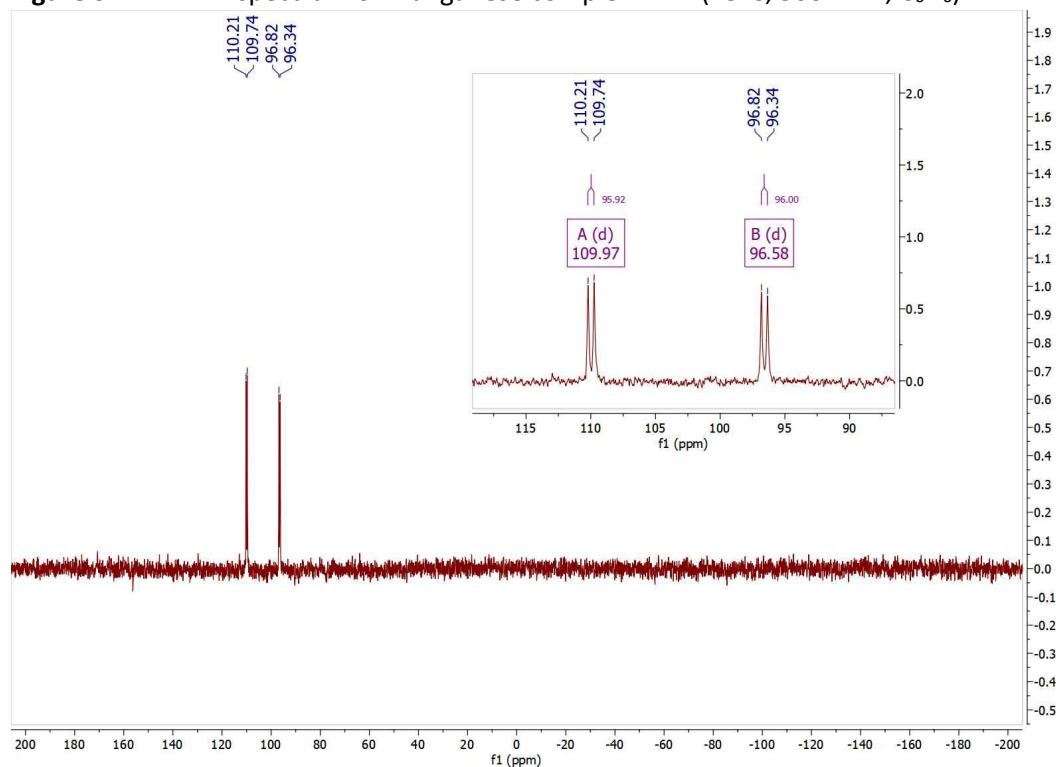

Figure S5.  $^{31}\text{P}\{^1\text{H}\}$  NMR spectrum of manganese complex **1Mn** (25°C, 202 MHz,  $\text{C}_6\text{D}_6$ ).

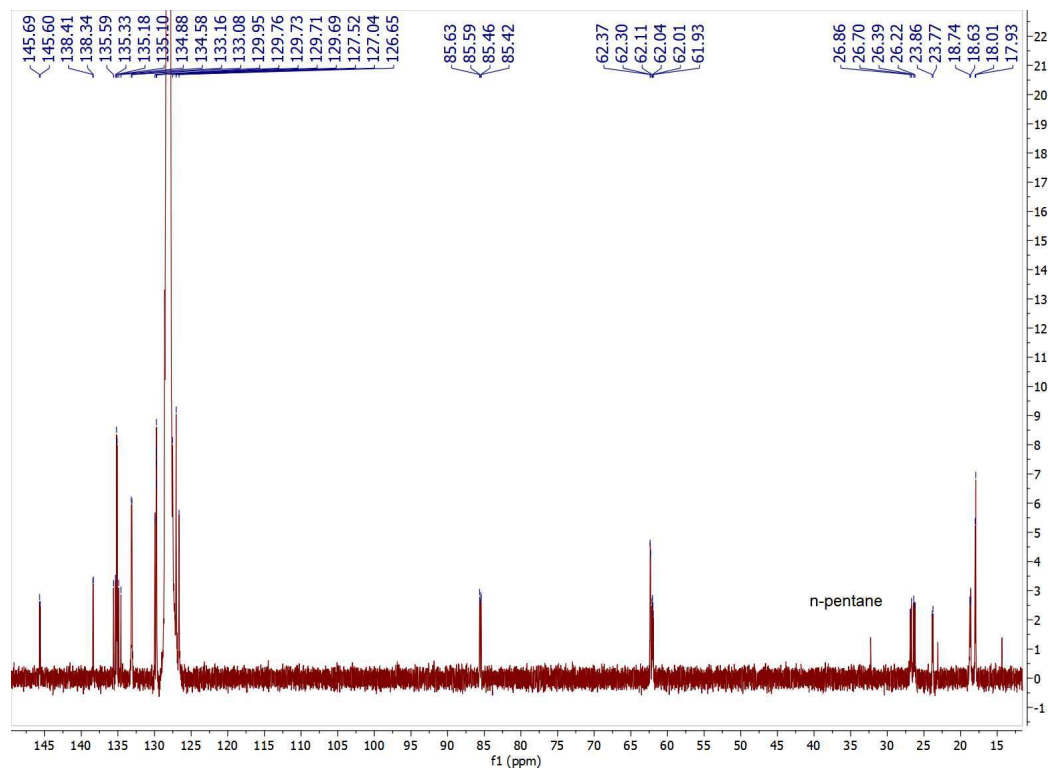

Figure S6.  $^{13}\text{C}\{^1\text{H}\}$  NMR spectrum of manganese complex **1Mn** (25°C, 125 MHz,  $\text{C}_6\text{D}_6$ ).

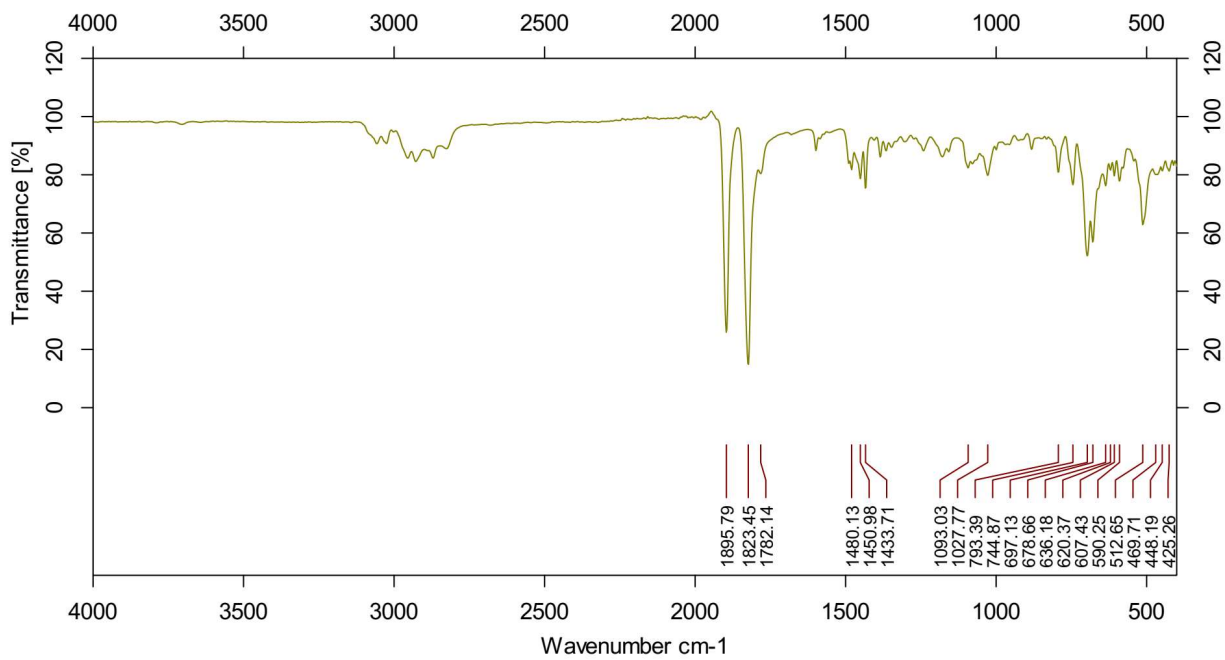

Figure S7. FT-IR spectrum of manganese complex **1Mn**.



## NMR study of manganese complex **1Mn** under a hydrogen atmosphere

A dry NMR tube with J. Young valve was charged with **1Mn** (25 mg, 0.05 mmol) and toluene- $d_8$  in a glovebox. It was taken outside, degassed, and connected to stainless steel line flushed with hydrogen. The line was set to hold 100 psi of hydrogen and the NMR tube was opened to the line. The J. Young valve was closed and the NMR tube was taken back into the box to be agitated to mix the solution. All of the NMR spectra were acquired using an Agilent DD2 500 MHz spectrometer (**Figure S8-11**). The sample was allowed to stay at room temperature for 2 days to observe further changes in the equilibrium (**Figure S12-14**). Hydrogen pressure was relieved and  $^1\text{H}$  and  $^{31}\text{P}\{^1\text{H}\}$  NMR spectra were found to be identical from **Figure S12** and **S13**. Excess acetophenone was added to the sample and further change was observed (**Figure S15-16**).

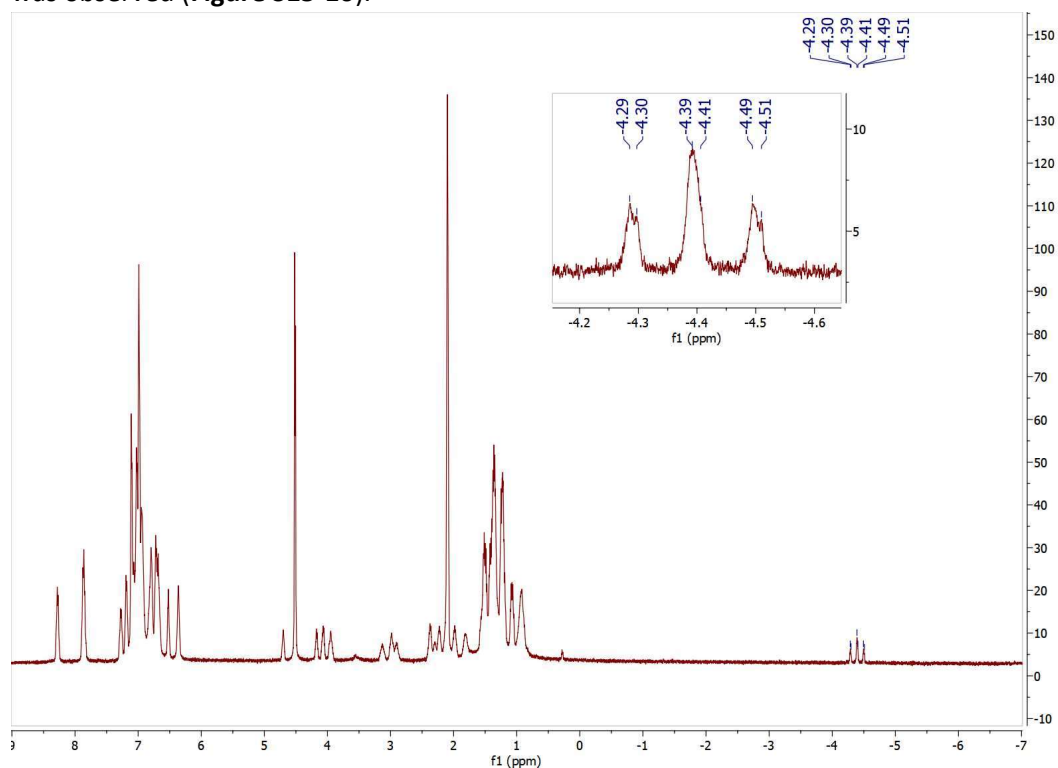

**Figure S8.** complex **1Mn** in toluene- $d_8$  under a hydrogen atmosphere; the insert is an expansion of the hydride signals.

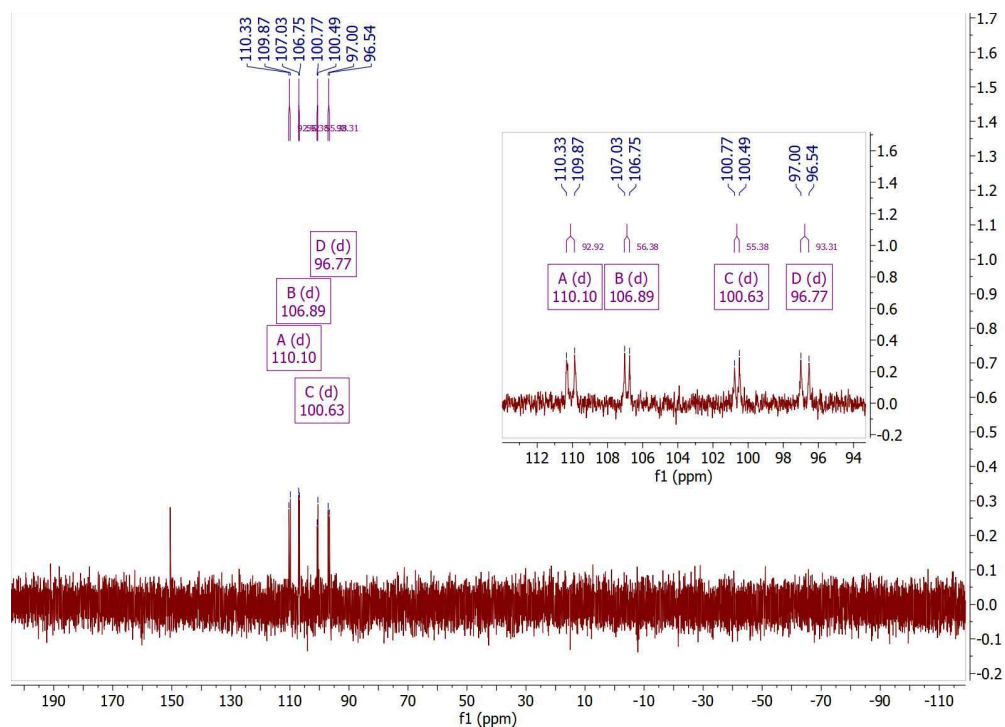

**Figure S9.**  $^{31}\text{P}\{^1\text{H}\}$  NMR spectrum (202 MHz) of manganese complex **1Mn** in toluene- $d_8$  under a hydrogen atmosphere with a spectrometer artifact near 150 ppm. New peaks at 106.9 ppm and 100.6 ppm were observed.

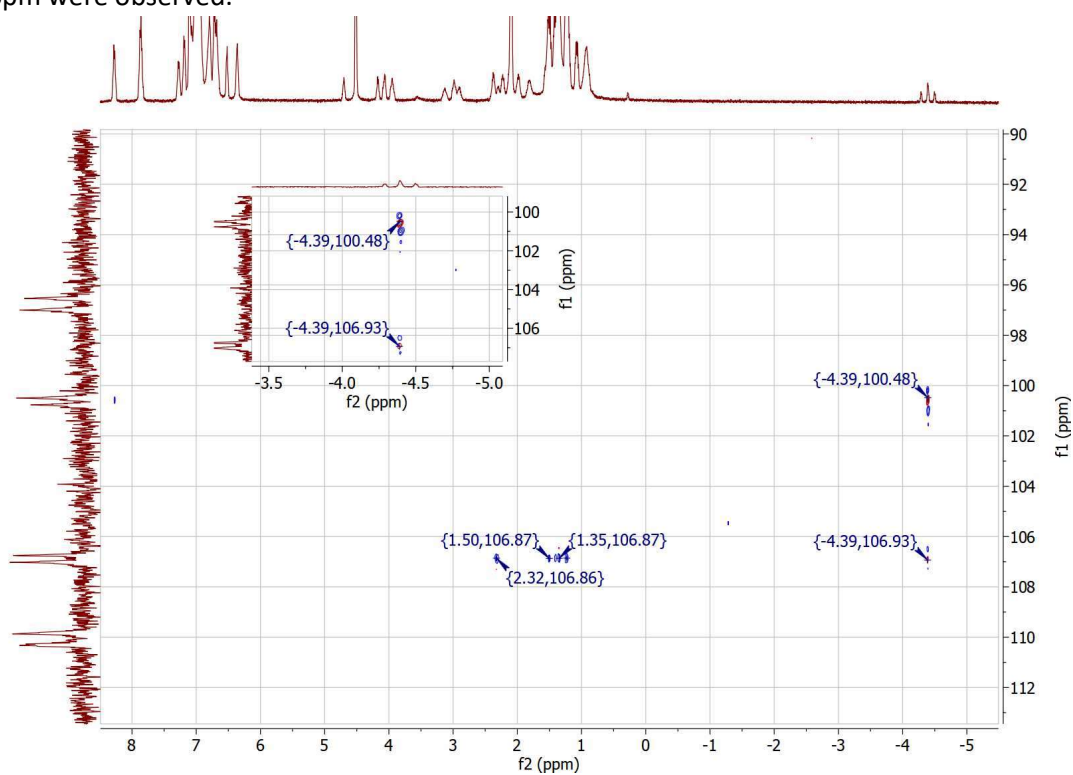

**Figure S10.**  $^1\text{H}$ - $^{31}\text{P}$  HSQC spectrum of manganese complex **1Mn** under a  $\text{H}_2$  atmosphere. The hydride peak correlated to the new peaks at 106.9 ppm and 100.6 ppm in the  $^{31}\text{P}$  NMR spectrum.

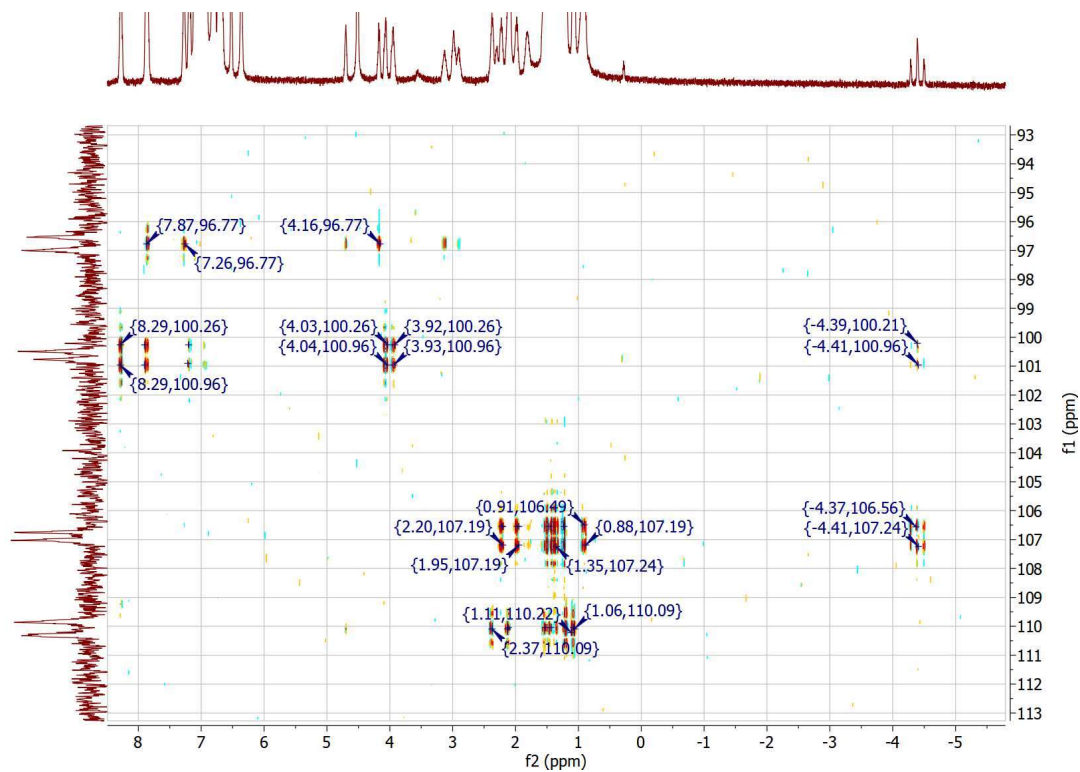

Figure S11.  $^1\text{H}$ - $^{31}\text{P}$  HMBC spectrum of manganese complex **1Mn** under a  $\text{H}_2$  atmosphere.

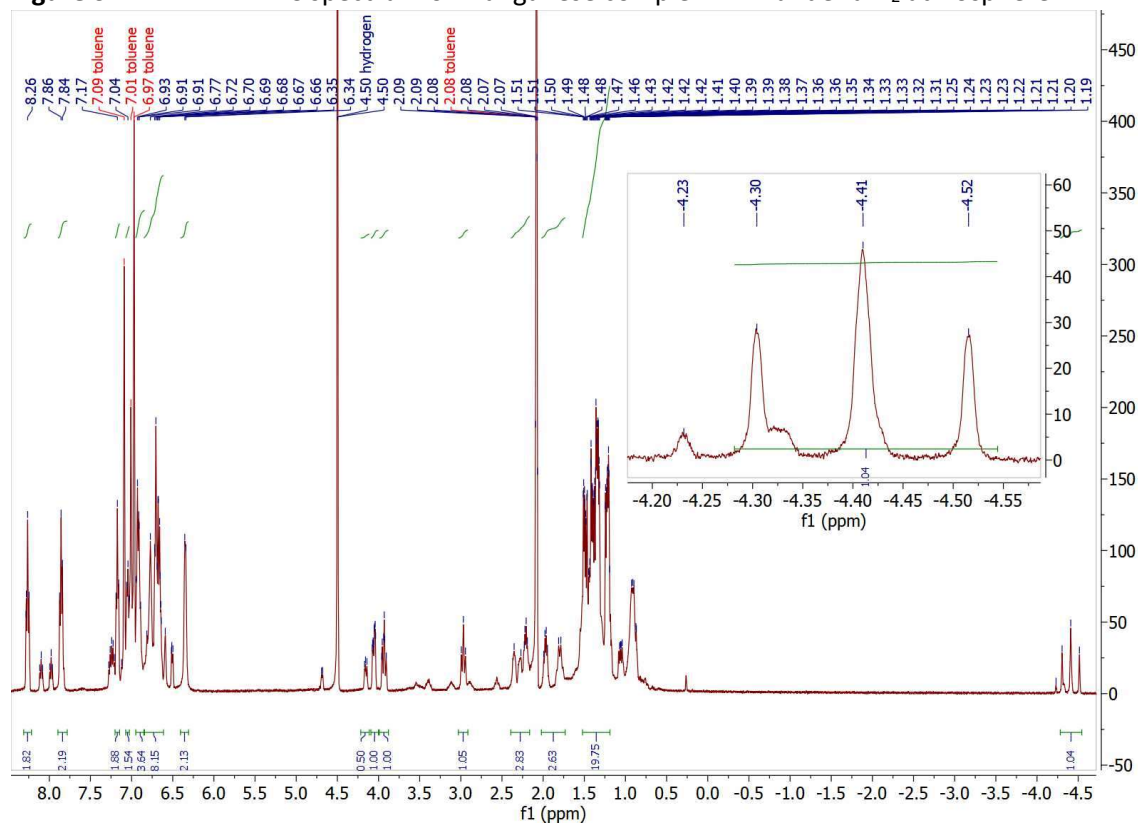

Figure S12.  $^1\text{H}$  NMR spectrum of **1Mn** under  $\text{H}_2$  atmosphere for 2 days; the insert is an expansion of the hydride signals.

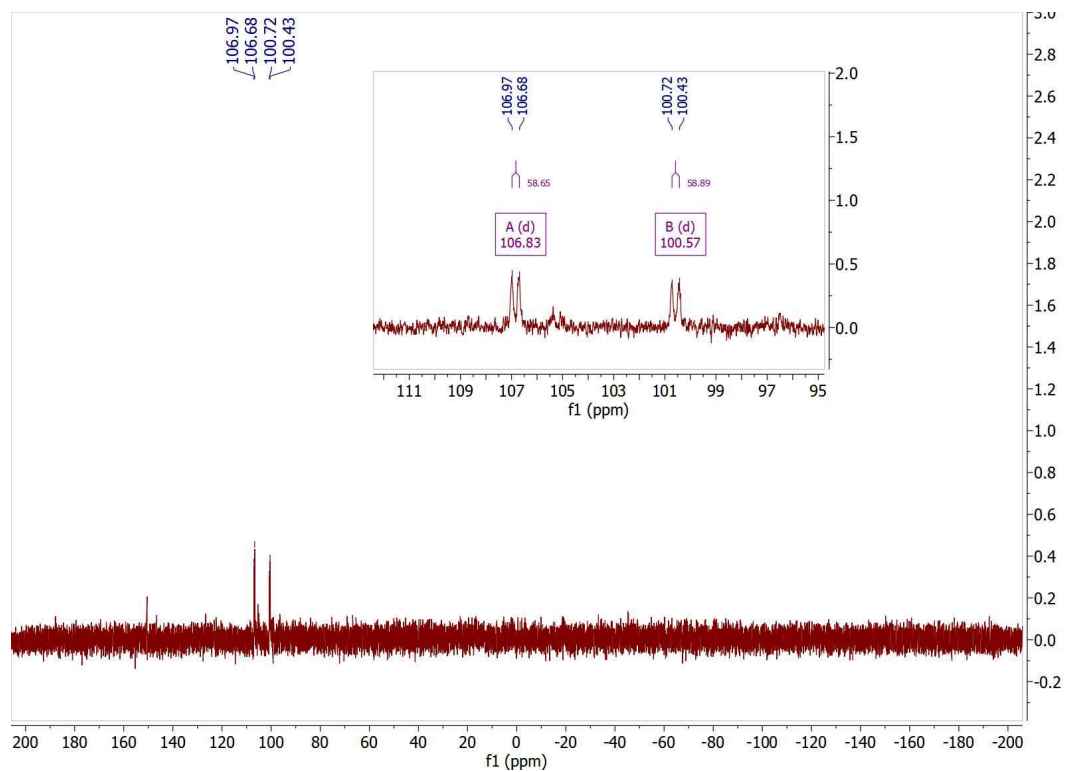

**Figure S13.**  $^{31}\text{P}\{^1\text{H}\}$  NMR spectrum of manganese complex **1Mn** in toluene- $d_8$  under a  $\text{H}_2$  atmosphere for 2 days.

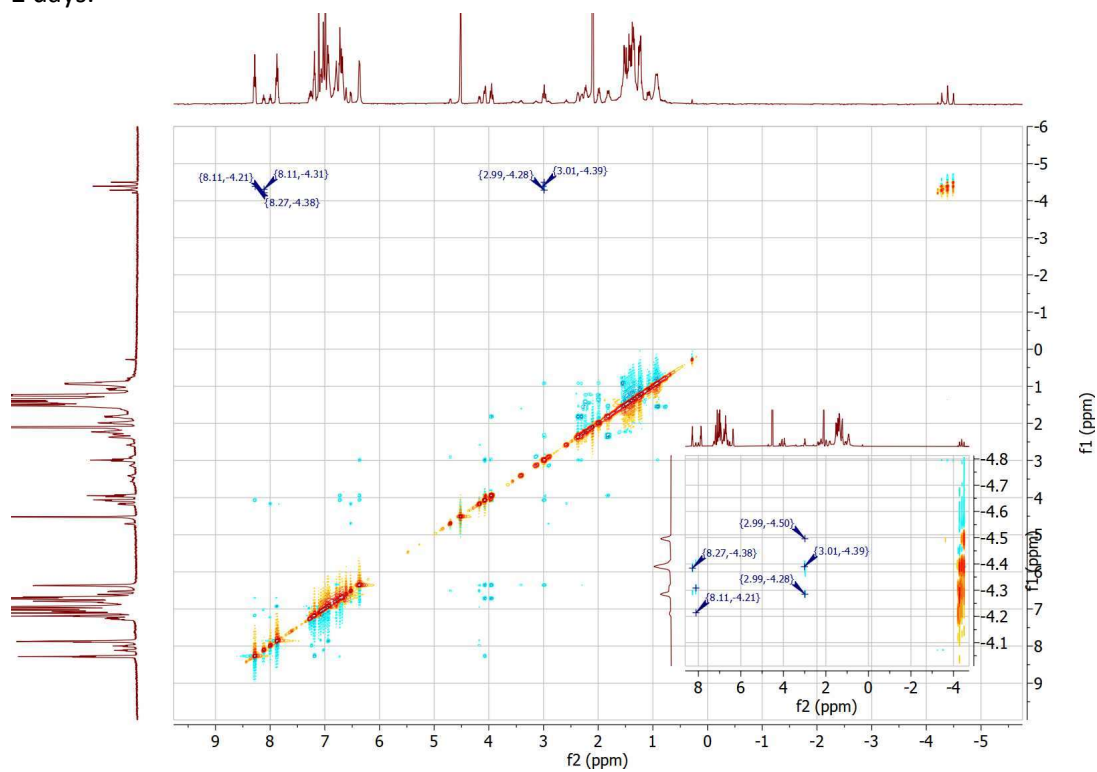

**Figure S14.**  $^1\text{H}\text{-}^1\text{H}$  NOESY spectrum of manganese complex **1Mn** in toluene- $d_8$  under a  $\text{H}_2$  atmosphere for 2.5 days.

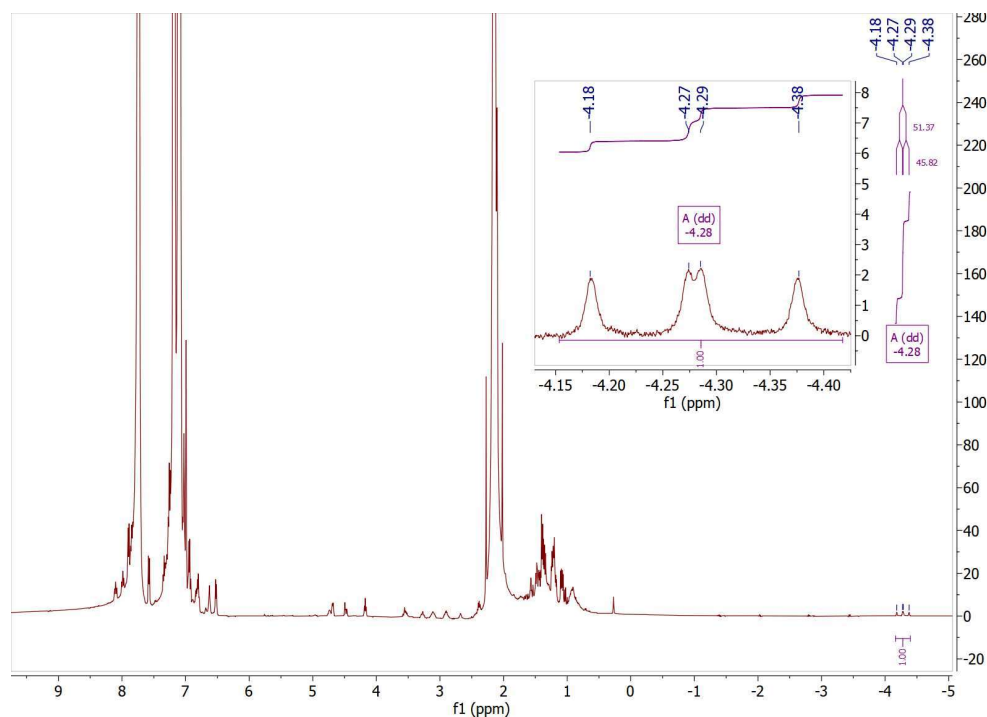

**Figure S15.**  $^1\text{H}$  NMR spectrum of the reaction mixture upon depressurization and addition of excess acetophenone. There were artifacts from the spectrometer observed from -1 to -4 ppm. Aside from those, one hydride species remains while mainly the **1Mn** was reformed with no obvious evidence of 1-phenylethanol formation.

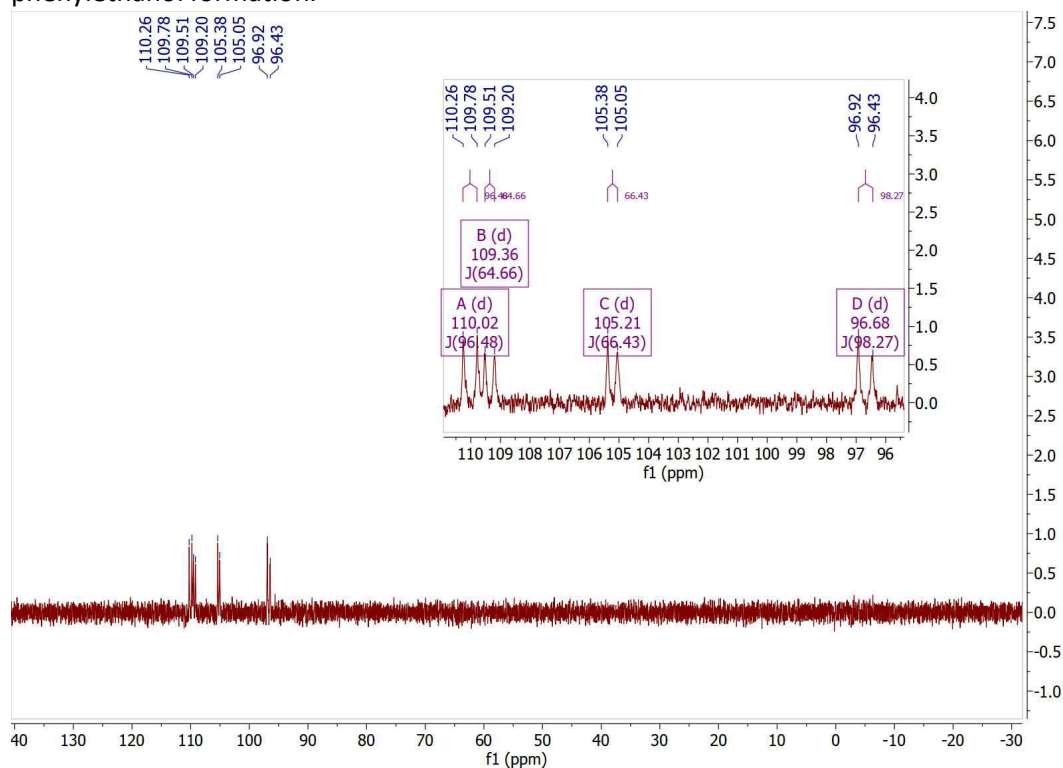

**Figure S16.**  $^{31}\text{P}\{^1\text{H}\}$  NMR spectrum of the reaction mixture upon addition of excess acetophenone. The manganese amido complex **1Mn** has reappeared along with a hydride isomer that does not lose  $\text{H}_2$ .

## General procedure for the direct hydrogenation of ketones

All of the hydrogenation reactions were performed at constant pressures using a stainless steel 50 mL Parr hydrogenation reactor. The reactor was maintained at the appropriate temperature in oil bath. The reactor was flushed several times with hydrogen gas at 10 bar prior to addition of the catalytic mixture. In an argon glovebox, the catalyst ( $5 \times 10^{-3}$  mmol), substrate (0.5 mmol) and di-tert-butylbenzene were weighed out, dissolved in 3 mL toluene and taken up in 6 mL syringe with 12 in. needles; the needles were then stoppered well. The syringe was taken out of the glovebox and injected into the prepared Parr reactor against a flow of hydrogen gas. The reaction was stopped after a given reaction time by exposing it to air, and the reactor was allowed to cool down. The catalytic mixture was filtered through a silica plug, then it was analyzed by gas chromatography.

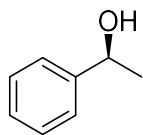

## (S)-1-phenylethanol

Gas chromatograph was developed using following condition:

Carrier gas H<sub>2</sub>, Injector temperature: 250°C, Split ratio: 50, column flow: 0.58 mL/min, progression: 130/25, detector temperature: 275°C,  $t_{maj}$ : 11.1 min,  $t_{min}$ : 10.6 min,  $t_{SM}$ : 6.3 min,  $[\alpha_D^{20}]$ : -30.0 (c = 0.01 g/mL, CHCl<sub>3</sub>)

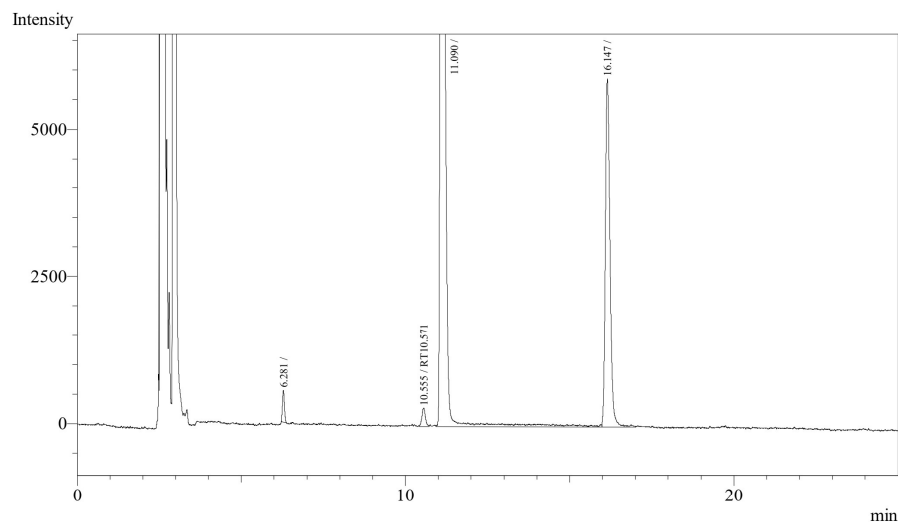

| Peak# | Ret.Time | Area   | Height | Conc.   | Unit | Mark | ID# | Cmpd Name |
|-------|----------|--------|--------|---------|------|------|-----|-----------|
| 1     | 6.281    | 2177   | 530    | 0.000   |      |      |     |           |
| 2     | 10.555   | 2388   | 317    | 0.000 % |      | V    | 4   | RT10.571  |
| 3     | 11.090   | 181548 | 20467  | 0.000   |      | SV   |     |           |
| 4     | 16.147   | 57611  | 5903   | 0.000   |      | SV   |     |           |
| Total |          | 243724 | 27217  |         |      |      |     |           |

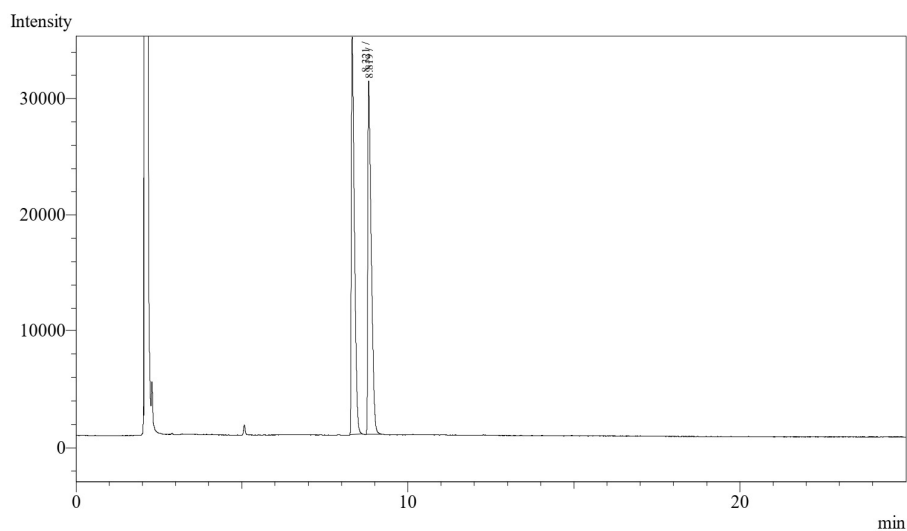

| Peak# | Ret.Time | Area   | Height | Conc. | Unit | Mark | ID# | Cmpd Name |
|-------|----------|--------|--------|-------|------|------|-----|-----------|
| 1     | 8.321    | 219179 | 34006  | 0.000 |      |      |     |           |
| 2     | 8.819    | 219821 | 30352  | 0.000 |      |      |     |           |
| Total |          | 439000 | 64358  |       |      |      |     |           |

**Figure S17.** Gas chromatogram of catalytic mixture (top) and racemic mixture (bottom) of 1-phenylethanol.

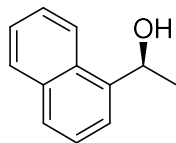

(S)-1-(1-naphthyl)ethanol

Gas chromatograph was developed using following condition:

Carrier gas H<sub>2</sub>, Injector temperature: 250°C, Split ratio: 50, column flow: 1.45 mL/min, progression: 120/20-5-150/20, detector temperature: 275°C,  $t_{maj}$ : 40.4 min,  $t_{min}$ : 43.3 min,  $t_{SM}$ : 26.6 min,  $[\alpha_D^{20}]$ : -45.2 (c = 0.01 g/mL, CHCl<sub>3</sub>)

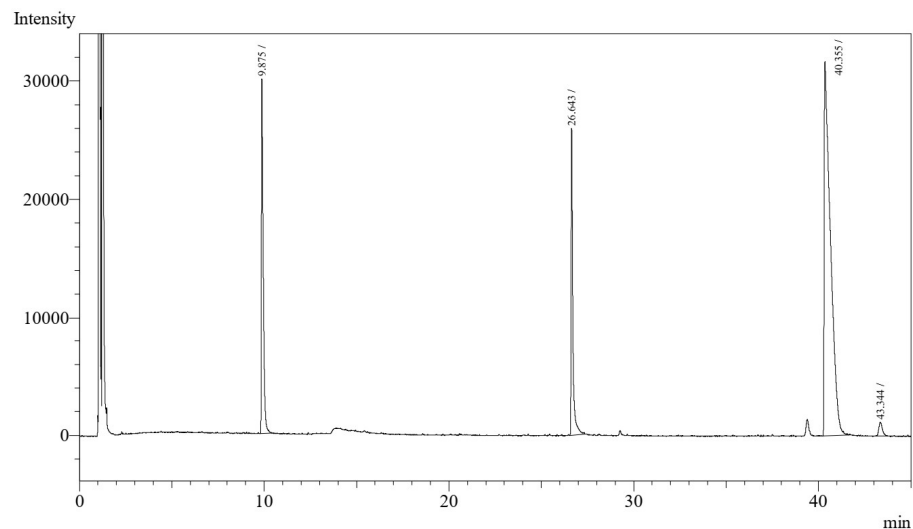

| Peak# | Ret.Time | Area    | Height | Conc.  | Unit | Mark | ID# | Cmpd Name |
|-------|----------|---------|--------|--------|------|------|-----|-----------|
| 1     | 9.875    | 205548  | 29977  | 18.217 | S    |      |     |           |
| 2     | 26.643   | 164831  | 25940  | 14.608 | S    |      |     |           |
| 3     | 40.355   | 742776  | 31657  | 65.830 | SV   |      |     |           |
| 4     | 43.344   | 15176   | 1173   | 1.345  | V    |      |     |           |
| Total |          | 1128331 | 88747  |        |      |      |     |           |

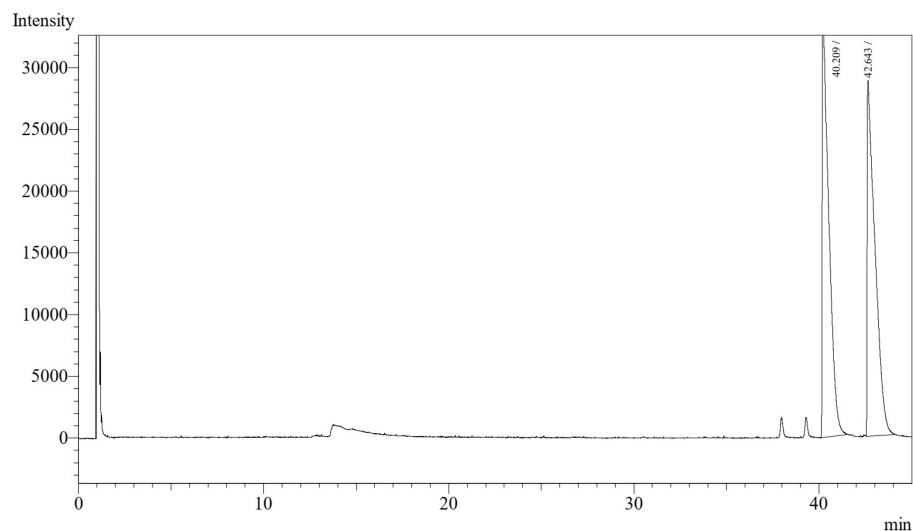

| Peak# | Ret.Time | Area    | Height | Conc.  | Unit | Mark | ID# | Cmpd Name |
|-------|----------|---------|--------|--------|------|------|-----|-----------|
| 1     | 40.209   | 844603  | 34323  | 50.092 | S    |      |     |           |
| 2     | 42.643   | 841507  | 28834  | 49.908 | SV   |      |     |           |
| Total |          | 1686110 | 63157  |        |      |      |     |           |

**Figure S18.** Gas chromatogram of catalytic mixture (top) and racemic mixture (bottom) of 1-(1-naphthyl)ethanol.



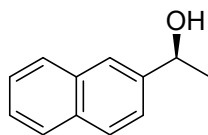

(S)-1-(2-naphthyl)ethanol

Gas chromatograph was developed using following condition:

Carrier gas H<sub>2</sub>, Injector temperature: 250°C, Split ratio: 50, column flow: 1.45 mL/min, progression: 120/20-5-150/20, detector temperature: 275°C,  $t_{maj}$ : 39.0 min,  $t_{min}$ : 38.0 min,  $t_{SM}$ : 29.2 min,  $[\alpha_D^{20}]$ : -31.4 (c = 0.01 g/mL, CHCl<sub>3</sub>)

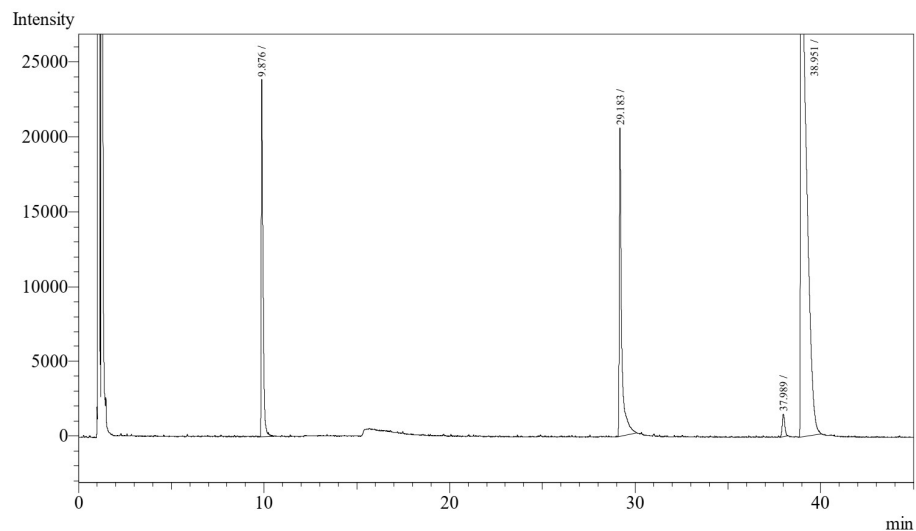

| Peak# | Ret.Time | Area    | Height | Conc.  | Unit | Mark | ID# | Cmpd Name |
|-------|----------|---------|--------|--------|------|------|-----|-----------|
| 1     | 9.876    | 154322  | 23804  | 13.846 |      | S    |     |           |
| 2     | 29.183   | 180357  | 20619  | 16.182 |      | S    |     |           |
| 3     | 37.989   | 14187   | 1504   | 1.273  |      |      |     |           |
| 4     | 38.951   | 765678  | 34890  | 68.699 |      | S    |     |           |
| Total |          | 1114544 | 80817  |        |      |      |     |           |

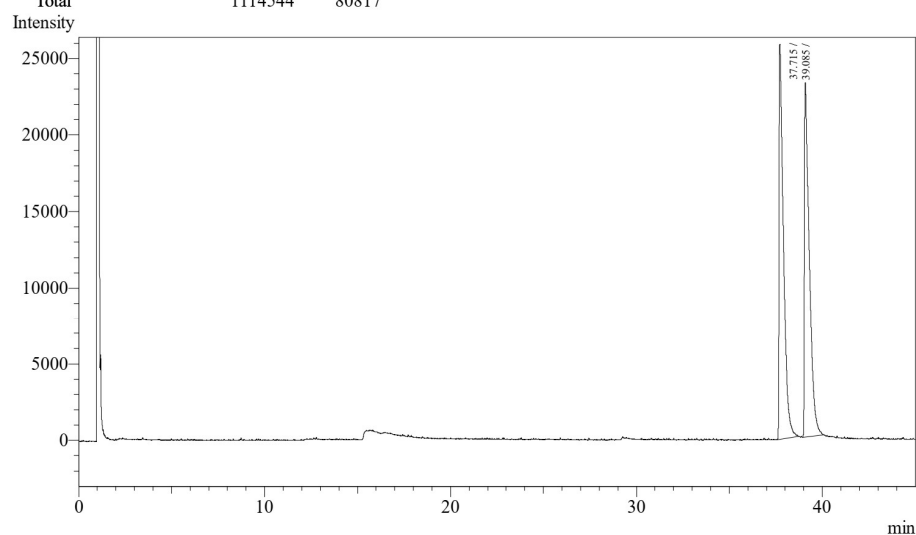

| Peak# | Ret.Time | Area   | Height | Conc.  | Unit | Mark | ID# | Cmpd Name |
|-------|----------|--------|--------|--------|------|------|-----|-----------|
| 1     | 37.715   | 424771 | 25845  | 50.206 |      | S    |     |           |
| 2     | 39.085   | 421293 | 23197  | 49.794 |      | S    |     |           |
| Total |          | 846064 | 49042  |        |      |      |     |           |

**Figure S19.** Gas chromatogram of catalytic mixture (top) and racemic mixture (bottom) of 1-(2-naphthyl)ethanol.

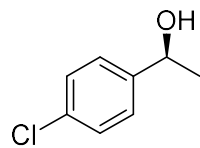

(S)-1-(4'-chlorophenyl)ethanol

Gas chromatograph was developed using following condition:

Carrier gas H<sub>2</sub>, Injector temperature: 250°C, Split ratio: 50, column flow: 1.47 mL/min, progression: 145/10, detector temperature: 275°C, t<sub>maj</sub>: 6.2 min, t<sub>min</sub>: 5.8 min, t<sub>SM</sub>: 3.1 min, [ $\alpha_D^{20}$ ]: -31.4 (c = 0.01 g/mL, CHCl<sub>3</sub>)

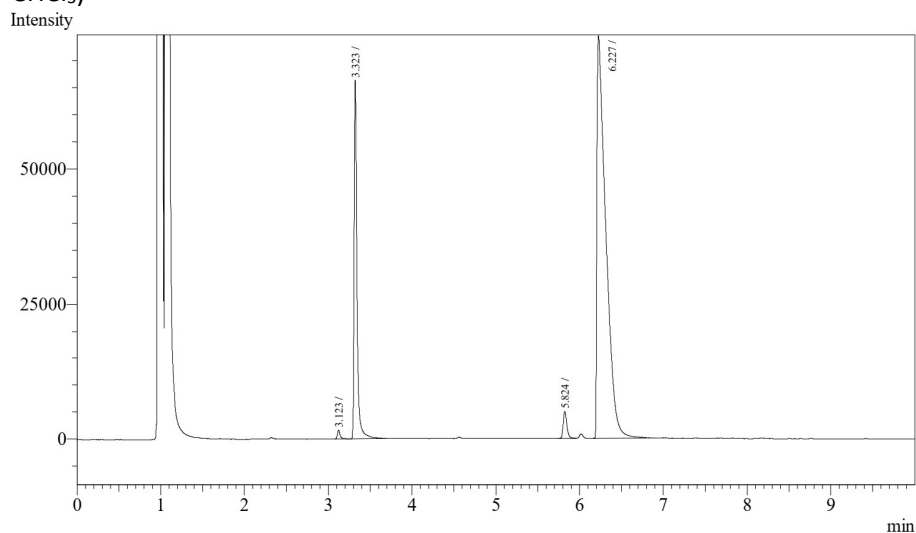

| Peak# | Ret.Time | Area   | Height | Conc.  | Unit | Mark | ID# | Compd Name |
|-------|----------|--------|--------|--------|------|------|-----|------------|
| 1     | 3.123    | 3674   | 1610   | 0.505  |      |      |     |            |
| 2     | 3.323    | 156554 | 65674  | 21.504 |      | V    |     |            |
| 3     | 5.824    | 15194  | 4976   | 2.087  |      |      |     |            |
| 4     | 6.227    | 552586 | 74282  | 75.904 |      | S    |     |            |
| Total |          | 728008 | 146542 |        |      |      |     |            |

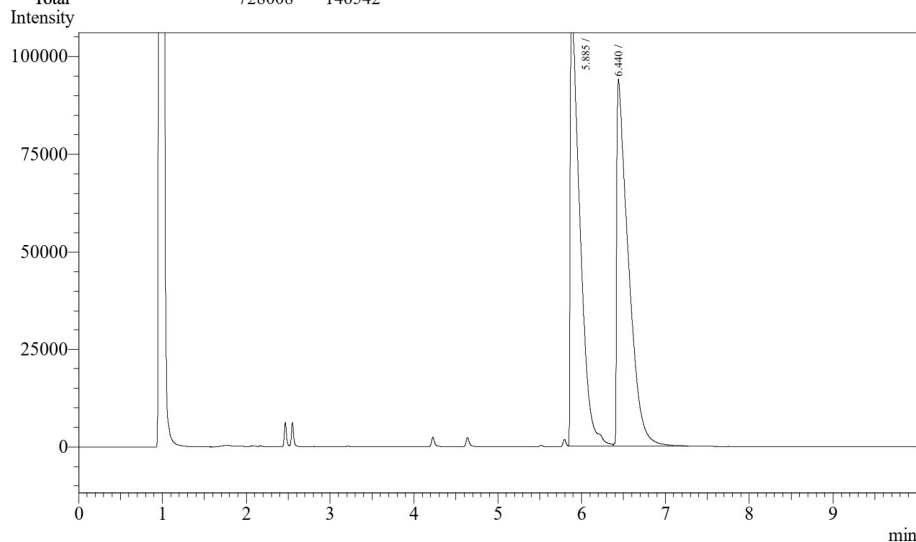

| Peak# | Ret.Time | Area    | Height | Conc.  | Unit | Mark | ID# | Compd Name |
|-------|----------|---------|--------|--------|------|------|-----|------------|
| 1     | 5.885    | 907641  | 112297 | 49.963 |      |      |     |            |
| 2     | 6.440    | 908985  | 93824  | 50.037 |      | SV   |     |            |
| Total |          | 1816626 | 206121 |        |      |      |     |            |

**Figure S20.** Gas chromatogram of catalytic mixture (top) and racemic mixture (bottom) of 1-(4'-chlorophenyl)ethanol.

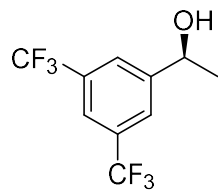

(S)-1-(3',5'-bis(trifluoromethyl)phenyl)ethanol

Gas chromatograph was developed using following condition:

Carrier gas H<sub>2</sub>, Injector temperature: 250°C, Split ratio: 50, column flow: 1.02 mL/min, progression: 120/20, detector temperature: 275°C,  $t_{maj}$ : 6.1 min,  $t_{min}$ : 7.0 min,  $t_{SM}$ : 4.9 min,  $[\alpha_D^{20}]$ : -45.2 (c = 0.01 g/mL, CHCl<sub>3</sub>)

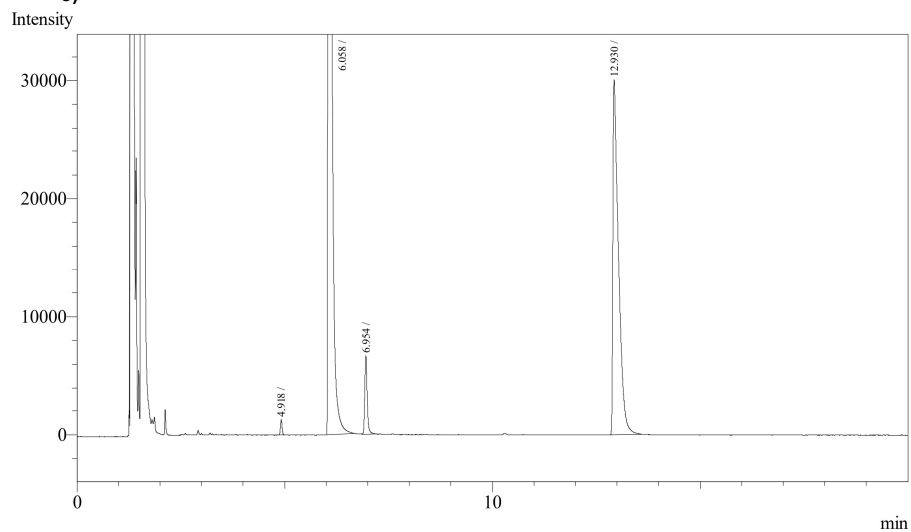

| Peak# | Ret.Time | Area   | Height | Conc.  | Unit | Mark | ID# | Cmpd Name |
|-------|----------|--------|--------|--------|------|------|-----|-----------|
| 1     | 4.918    | 3496   | 1291   | 0.394  |      |      |     |           |
| 2     | 6.058    | 573679 | 102356 | 64.716 |      |      |     |           |
| 3     | 6.954    | 27080  | 6638   | 3.055  |      |      |     |           |
| 4     | 12.930   | 282203 | 30058  | 31.835 |      | S    |     |           |
| Total |          | 886458 | 140343 |        |      |      |     |           |

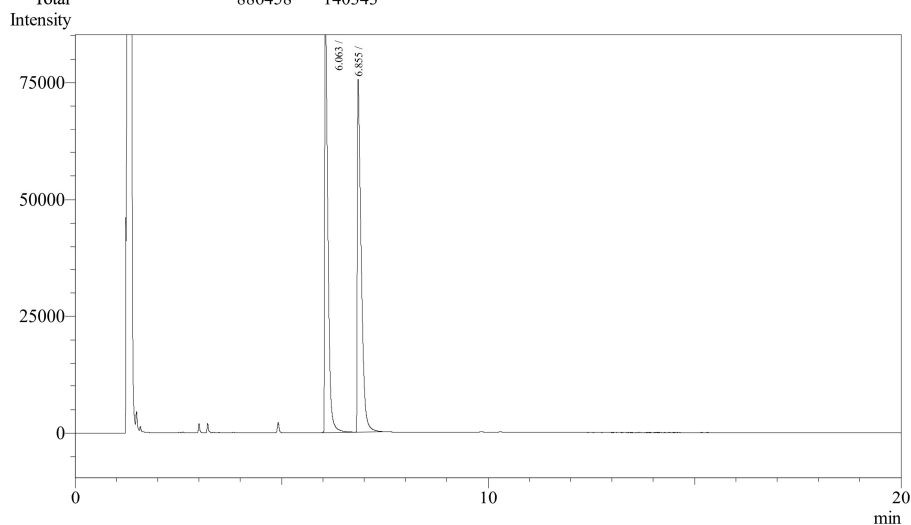

| Peak# | Ret.Time | Area   | Height | Conc.  | Unit | Mark | ID# | Cmpd Name |
|-------|----------|--------|--------|--------|------|------|-----|-----------|
| 1     | 6.063    | 494318 | 93592  | 50.183 |      | S    |     |           |
| 2     | 6.855    | 490710 | 75388  | 49.817 |      | S    |     |           |
| Total |          | 985028 | 168980 |        |      |      |     |           |

**Figure S21.** Gas chromatogram of catalytic mixture (top) and racemic mixture (bottom) of 1-(3',5'-(bistrifluoromethyl)phenyl)ethanol.

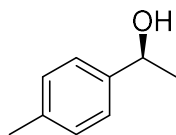

(S)-1-(4'-methylphenyl)ethanol

Gas chromatograph was developed using following condition:

Carrier gas H<sub>2</sub>, Injector temperature: 250°C, Split ratio: 50, column flow: 0.97 mL/min, progression: 110/30, detector temperature: 275°C,  $t_{maj}$ : 23.6 min,  $t_{min}$ : 20.6 min,  $t_{SM}$ : 25.1 min,  $[\alpha_D^{20}]$ : -15.0 (c = 0.01 g/mL, CHCl<sub>3</sub>)

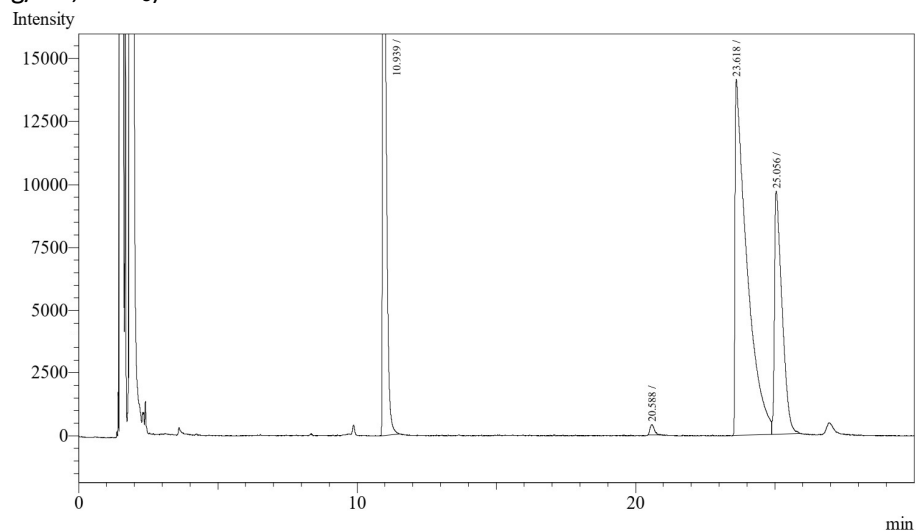

| Peak# | Ret.Time | Area   | Height | Conc.  | Unit | Mark | ID# | Cmpd Name |
|-------|----------|--------|--------|--------|------|------|-----|-----------|
| 1     | 10.939   | 252870 | 31602  | 29.406 |      |      |     |           |
| 2     | 20.588   | 4656   | 425    | 0.541  |      |      |     |           |
| 3     | 23.618   | 418955 | 14163  | 48.721 |      |      |     |           |
| 4     | 25.056   | 183433 | 9684   | 21.332 |      | SV   |     |           |
| Total |          | 859914 | 55874  |        |      |      |     |           |

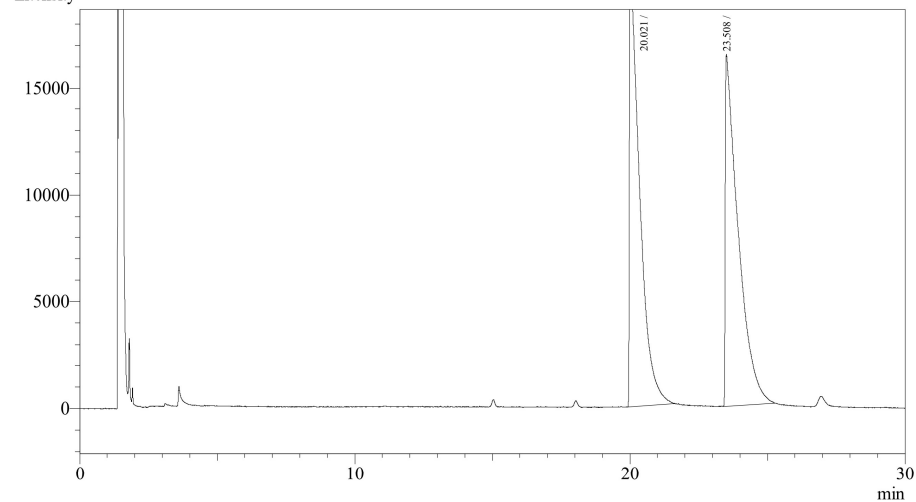

| Peak# | Ret.Time | Area    | Height | Conc.  | Unit | Mark | ID# | Cmpd Name |
|-------|----------|---------|--------|--------|------|------|-----|-----------|
| 1     | 20.021   | 530301  | 21057  | 49.720 |      |      |     |           |
| 2     | 23.508   | 536279  | 16485  | 50.280 |      | S    |     |           |
| Total |          | 1066580 | 37542  |        |      |      |     |           |

**Figure S22.** Gas chromatogram of catalytic mixture (top) and racemic mixture (bottom) of 1-(4'-methylphenyl)ethanol.

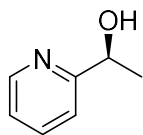

(S)-1-(2-pyridyl)ethanol

$^1\text{H NMR}$  (500 MHz,  $\text{CDCl}_3$ ):  $\delta$  8.52 (ddd,  $J = 5.1, 1.8, 1.1$  Hz, 1H), 7.67 (td,  $J = 7.7, 1.8$  Hz, 1H), 7.28 (dq,  $J = 8.1, 0.9$  Hz, 1H), 7.18 (ddd,  $J = 7.4, 4.9, 1.1$  Hz, 1H), 4.88 (q,  $J = 6.6$  Hz, 1H), 1.49 (d,  $J = 6.6$  Hz, 3H).  $^{13}\text{C}\{^1\text{H}\}$  NMR (125 MHz,  $\text{CDCl}_3$ ):  $\delta$  163.18, 148.21, 136.94, 122.33, 119.93, 68.97, 24.36.

Product ratio was determined by HPLC, Chiralpak OD-H column, 2% iPrOH in hexanes (30 min), 1.0 mL/min.  $t_{\text{maj}}$ : 17.9 min,  $t_{\text{min}}$ : 16.0 min,  $[\alpha]_D^{20}$ : -13.4 ( $c = 0.01$  g/mL,  $\text{CHCl}_3$ )

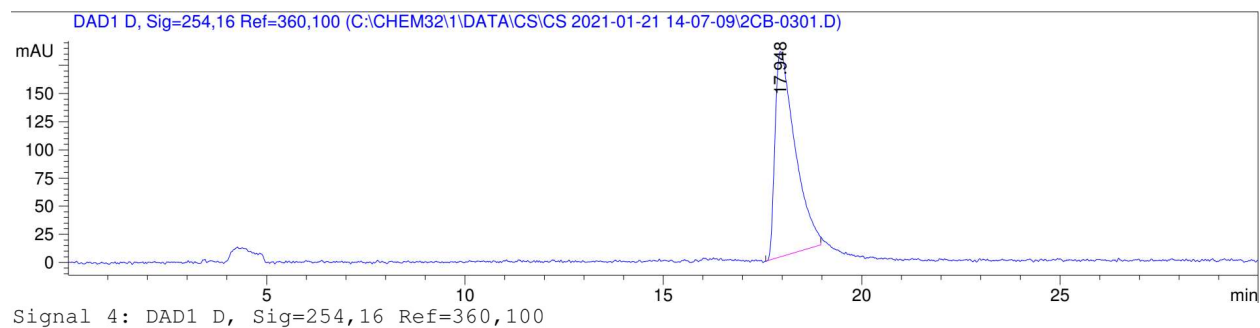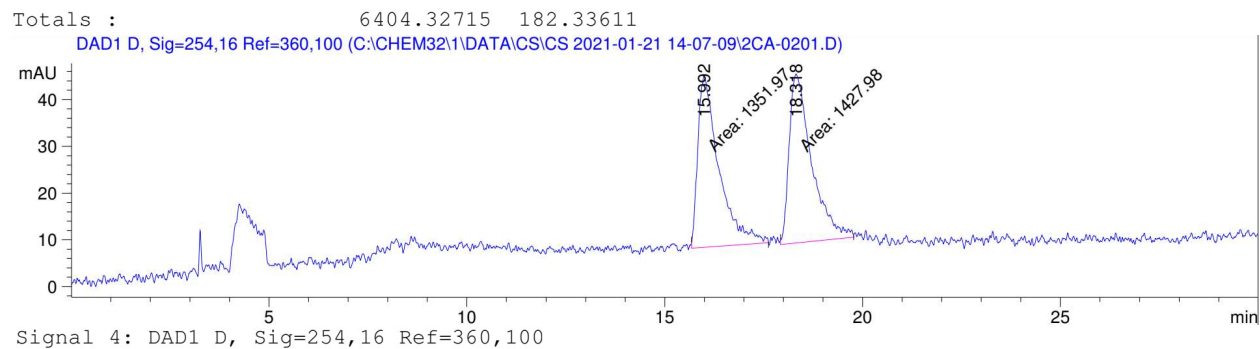

**Figure S23.** HPLC chromatogram of catalytic mixture (top) and racemic mixture (bottom) of 2-pyridylethanol.

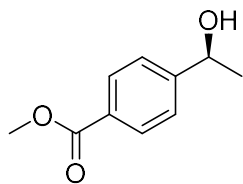

## Methyl 4-((1S)-1-hydroxyethyl)benzoate

Gas chromatograph was developed using following condition:

Carrier gas H<sub>2</sub>, Injector temperature: 250°C, Split ratio: 50, column flow: 0.96 mL/min, progression: 160/25, detector temperature: 275°C,  $t_{maj}$ : 12.4 min,  $t_{min}$ : 11.9 min,  $t_{SM}$ : 6.3 min,  $[\alpha_D^{20}]$ : -23.8 (c = 0.01 g/mL, CHCl<sub>3</sub>)

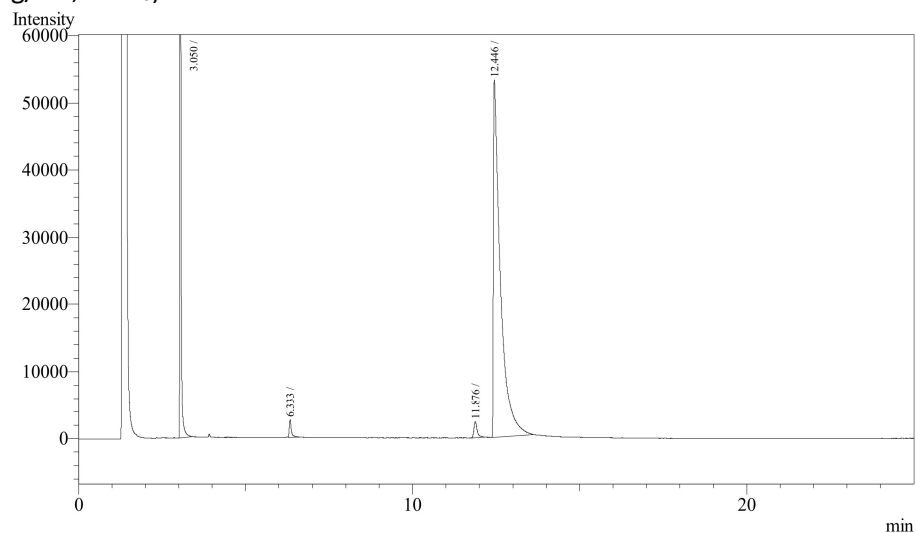

| Peak# | Ret. Time | Area    | Height | Conc.  | Unit | Mark | ID# | Cmpd Name |
|-------|-----------|---------|--------|--------|------|------|-----|-----------|
| 1     | 3.050     | 249930  | 107014 | 23.798 |      |      |     |           |
| 2     | 6.333     | 11777   | 2635   | 1.121  |      | SV   |     |           |
| 3     | 11.876    | 16025   | 2378   | 1.526  |      |      |     |           |
| 4     | 12.446    | 772464  | 53191  | 73.554 |      |      |     |           |
| Total |           | 1050196 | 165218 |        |      |      |     |           |

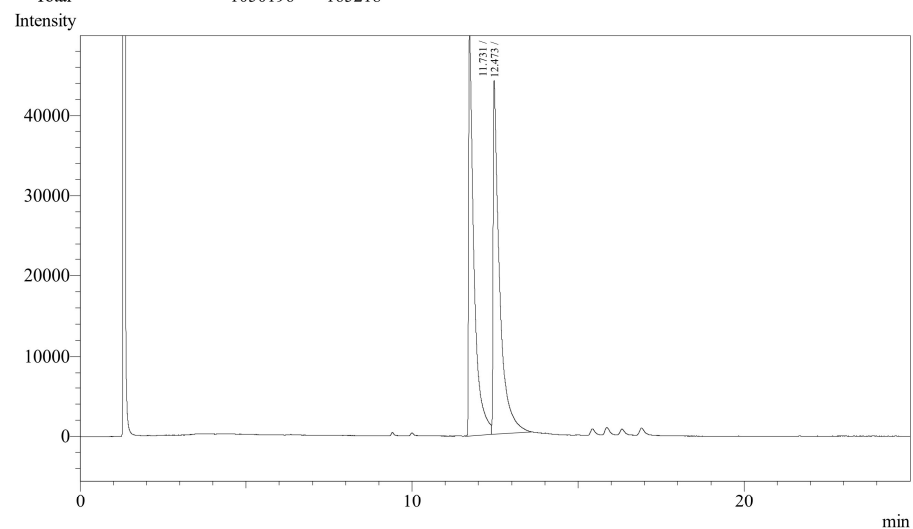

| Peak# | Ret. Time | Area    | Height | Conc.  | Unit | Mark | ID# | Cmpd Name |
|-------|-----------|---------|--------|--------|------|------|-----|-----------|
| 1     | 11.731    | 565134  | 50561  | 48.791 |      |      |     |           |
| 2     | 12.473    | 593133  | 44106  | 51.209 |      | V    |     |           |
| Total |           | 1158267 | 94667  |        |      |      |     |           |

**Figure S24.** Gas chromatogram of catalytic mixture (top) and racemic mixture (bottom) of methyl 4-(1-hydroxyethyl)benzoate.

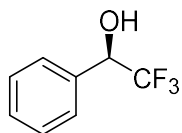

(*R*)-1-phenyl-2,2,2-trifluoroethanol

Gas chromatograph was developed using following condition:

Carrier gas H<sub>2</sub>, Injector temperature: 250°C, Split ratio: 50, column flow: 1.01 mL/min, progression: 130/25, detector temperature: 275°C,  $t_{maj}$ : 9.5 min,  $t_{min}$ : 9.2 min,  $t_{SM}$ : 1.8 min,  $[\alpha_D^{20}]$ : -7.6 (c = 0.01 g/mL, CHCl<sub>3</sub>)

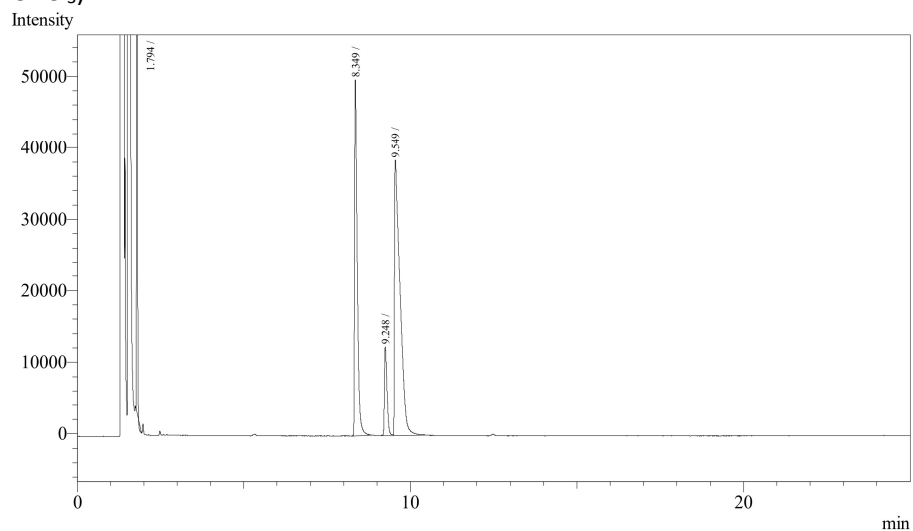

| Peak# | Ret.Time | Area   | Height | Conc.  | Unit | Mark | ID# | Cmpd Name |
|-------|----------|--------|--------|--------|------|------|-----|-----------|
| 1     | 1.794    | 170350 | 99725  | 17.796 |      |      |     |           |
| 2     | 8.349    | 275346 | 49664  | 28.764 |      | S    |     |           |
| 3     | 9.248    | 66607  | 12421  | 6.958  |      |      |     |           |
| 4     | 9.549    | 444963 | 38454  | 46.483 |      | SV   |     |           |
| Total |          | 957266 | 200264 |        |      |      |     |           |

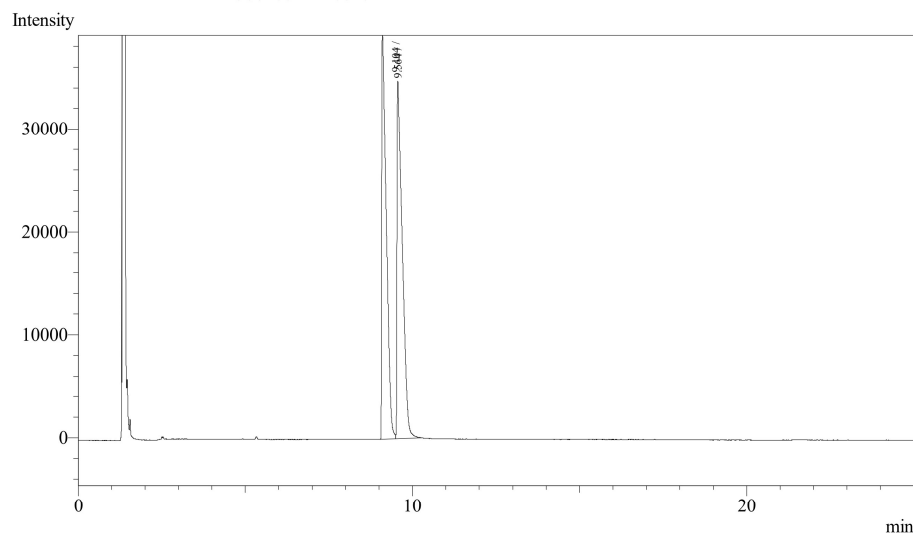

| Peak# | Ret.Time | Area   | Height | Conc.  | Unit | Mark | ID# | Cmpd Name |
|-------|----------|--------|--------|--------|------|------|-----|-----------|
| 1     | 9.104    | 378237 | 39519  | 49.685 |      |      |     |           |
| 2     | 9.564    | 383041 | 34689  | 50.315 |      | SV   |     |           |
| Total |          | 761278 | 74208  |        |      |      |     |           |

**Figure S25.** Gas chromatogram of catalytic mixture (top) and racemic mixture (bottom) of 1-phenyl-2,2,2-trifluoroethanol.

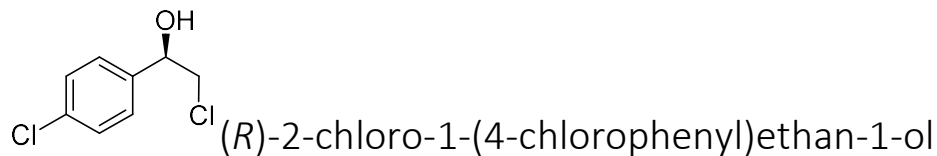

Gas chromatograph was developed using following condition:

Carrier gas H<sub>2</sub>, Injector temperature: 250°C, Split ratio: 50, column flow: 1.47 mL/min, progression: 145/30, detector temperature: 275°C, t<sub>maj</sub>: 23.2 min, t<sub>min</sub>: 20.6 min, t<sub>SM</sub>: 10.0 min, [ $\alpha_D^{20}$ ]: -26.6 (c = 0.01 g/mL, CHCl<sub>3</sub>)

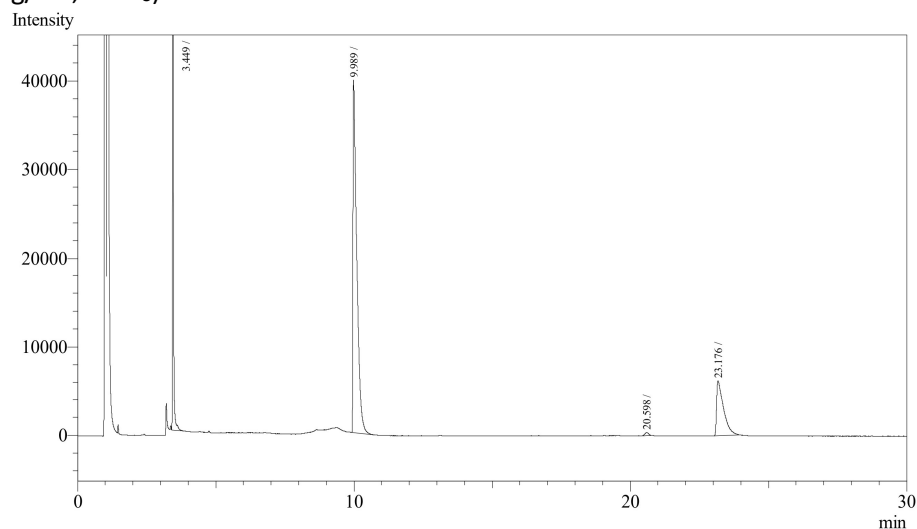

| Peak# | Ret.Time | Area   | Height | Conc.  | Unit | Mark | ID# | Cmpd Name |
|-------|----------|--------|--------|--------|------|------|-----|-----------|
| 1     | 3.449    | 131699 | 53407  | 21.126 |      | S    |     |           |
| 2     | 9.989    | 381640 | 39764  | 61.220 |      |      |     |           |
| 3     | 20.598   | 3219   | 345    | 0.516  |      | V    |     |           |
| 4     | 23.176   | 106837 | 6229   | 17.138 |      |      |     |           |
| Total |          | 623395 | 99745  |        |      |      |     |           |

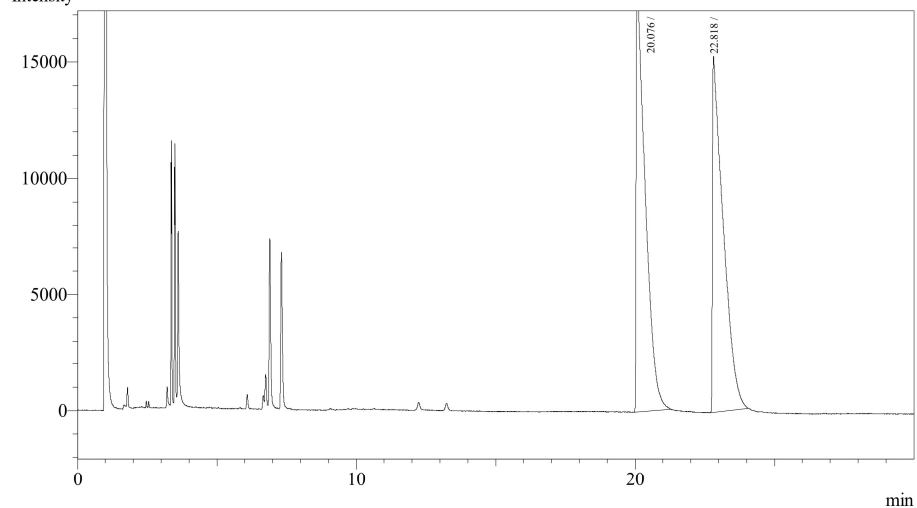

| Peak# | Ret.Time | Area   | Height | Conc.  | Unit | Mark | ID# | Cmpd Name |
|-------|----------|--------|--------|--------|------|------|-----|-----------|
| 1     | 20.076   | 416443 | 18388  | 50.351 |      |      |     |           |
| 2     | 22.818   | 410635 | 15299  | 49.649 |      |      |     |           |
| Total |          | 827078 | 33687  |        |      |      |     |           |

**Figure S26.** Gas chromatogram of catalytic mixture (top) and racemic mixture (bottom) of 2-chloro-1-(4-chlorophenyl)ethan-1-ol.



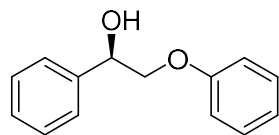

2-phenoxy-1-phenylethanol

$^1\text{H NMR}$  (500 MHz,  $\text{CDCl}_3$ ):  $\delta$  7.52-7.46 (m, 2H), 7.43 (ddd,  $J = 7.6, 6.4, 1.4$  Hz, 2H), 7.40-7.30 (m, 3H), 7.02 (tq,  $J = 7.3, 1.0$  Hz, 1H), 6.98-6.94 (m, 2H), 5.14 (dd,  $J = 8.8, 3.2$  Hz, 1H), 4.13 (dd,  $J = 9.7, 3.3$  Hz, 1H), 4.05 (dd,  $J = 9.6, 8.7$  Hz, 1H), 3.04 (br s, 1H).  $^{13}\text{C}\{^1\text{H}\}$  NMR (125 MHz,  $\text{CDCl}_3$ ):  $\delta$  158.45, 139.81, 129.61, 128.60, 128.20, 126.36, 121.33, 114.71, 73.35, 72.60.

Product ratio was determined by HPLC, Chiralpak AD-H column, IPA/Hex = 10:90 – 25 – 30:70, 1.0 mL/min.  $t_{\text{maj}}$ : 10.1 min,  $t_{\text{min}}$ : 12.4 min,  $t_{\text{SM}}$ : 8.7 min,  $[\alpha_D^{20}]$ : -34.8 ( $c = 0.01$  g/mL,  $\text{CHCl}_3$ )

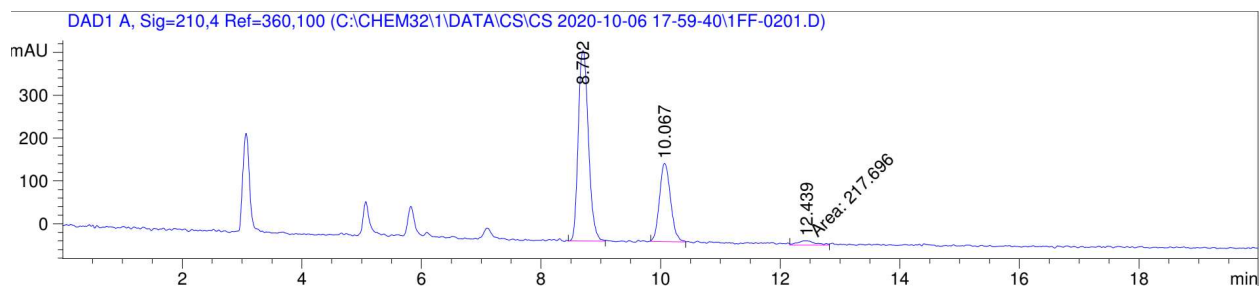

Signal 1: DAD1 A, Sig=210,4 Ref=360,100

| Peak # | RetTime [min] | Type | Width [min] | Area [mAU*s] | Height [mAU] | Area %  |
|--------|---------------|------|-------------|--------------|--------------|---------|
| 1      | 8.702         | BB   | 0.1879      | 5257.26123   | 444.77356    | 67.2013 |
| 2      | 10.067        | BB   | 0.1982      | 2348.19189   | 182.43895    | 30.0159 |
| 3      | 12.439        | MM   | 0.3544      | 217.69557    | 10.23825     | 2.7827  |

Totals : 7823.14870 637.45076

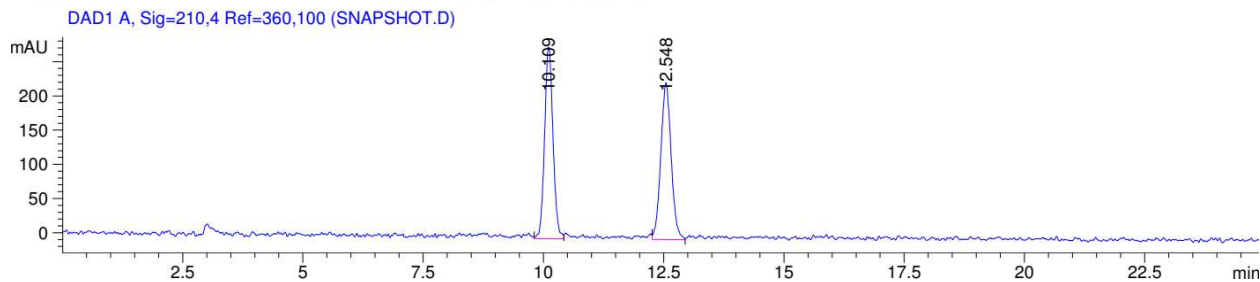

Signal 1: DAD1 A, Sig=210,4 Ref=360,100

| Peak # | RetTime [min] | Type | Width [min] | Area [mAU*s] | Height [mAU] | Area %  |
|--------|---------------|------|-------------|--------------|--------------|---------|
| 1      | 10.109        | VV   | 0.1839      | 3408.36499   | 280.24716    | 49.8309 |
| 2      | 12.548        | VV   | 0.2047      | 3431.49976   | 229.13759    | 50.1691 |

Totals : 6839.86475 509.38475

**Figure S27.** HPLC chromatogram of catalytic mixture (top) and racemic mixture (bottom) of 2-phenoxy-1-phenylethanol.

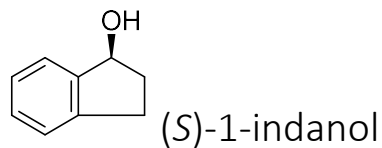

Gas chromatograph was developed using following condition:

Carrier gas H<sub>2</sub>, Injector temperature: 250°C, Split ratio: 50, column flow: 1.48 mL/min, progression: 90/50-13-120/10, detector temperature: 275°C,  $t_{maj}$ : 60.7 min,  $t_{min}$ : 61.7 min,  $t_{SM}$ : 45.6 min,  $[\alpha_D^{20}]$ : 6.8 (c = 0.01 g/mL, CHCl<sub>3</sub>)

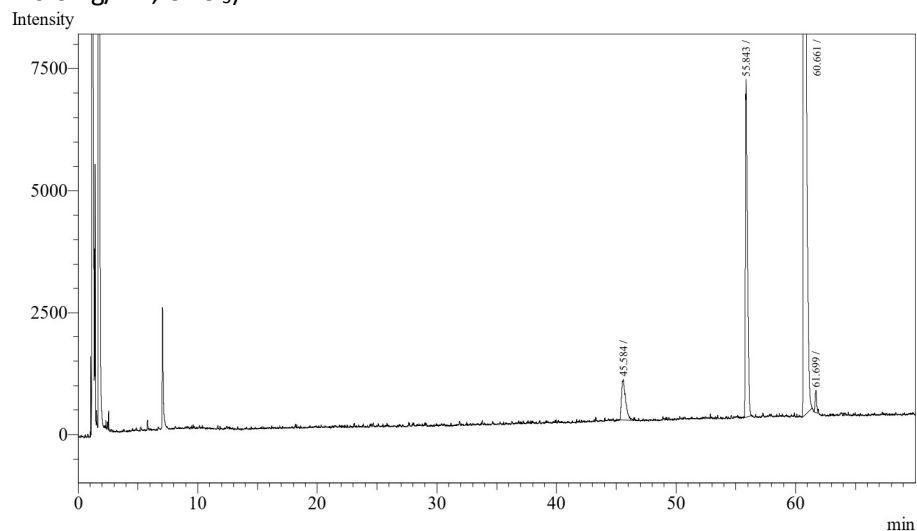

| Peak# | Ret.Time | Area   | Height | Conc.  | Unit | Mark | ID# | Cmpd Name |
|-------|----------|--------|--------|--------|------|------|-----|-----------|
| 1     | 45.584   | 19507  | 825    | 5.194  |      |      |     |           |
| 2     | 55.843   | 82612  | 6926   | 21.996 |      | V    |     |           |
| 3     | 60.661   | 269488 | 17801  | 71.754 |      |      |     |           |
| 4     | 61.699   | 3963   | 450    | 1.055  |      |      |     |           |
| Total |          | 375570 | 26002  |        |      |      |     |           |

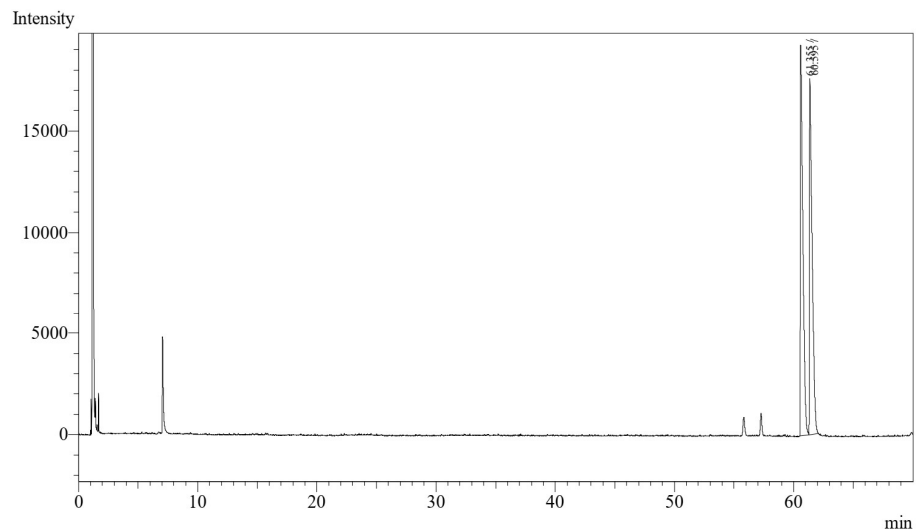

| Peak# | Ret.Time | Area   | Height | Conc.  | Unit | Mark | ID# | Cmpd Name |
|-------|----------|--------|--------|--------|------|------|-----|-----------|
| 1     | 60.595   | 281515 | 19303  | 50.124 |      | S    |     |           |
| 2     | 61.355   | 280118 | 17577  | 49.876 |      | V    |     |           |
| Total |          | 561633 | 36880  |        |      |      |     |           |

**Figure S28.** Gas chromatogram of catalytic mixture (top) and racemic mixture (bottom) of 1-indanol.

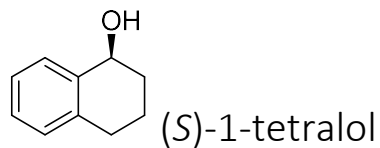

Gas chromatograph was developed using following condition:

Carrier gas H<sub>2</sub>, Injector temperature: 250°C, Split ratio: 50, column flow: 1.51 mL/min, progression: 110/40-4-130/10, detector temperature: 275°C, t<sub>maj</sub>: 16.0 min, t<sub>min</sub>: 17.1 min, t<sub>SM</sub>: 5.9 min, [α<sub>D</sub><sup>20</sup>]: 28.0 (c = 0.01 g/mL, CHCl<sub>3</sub>)

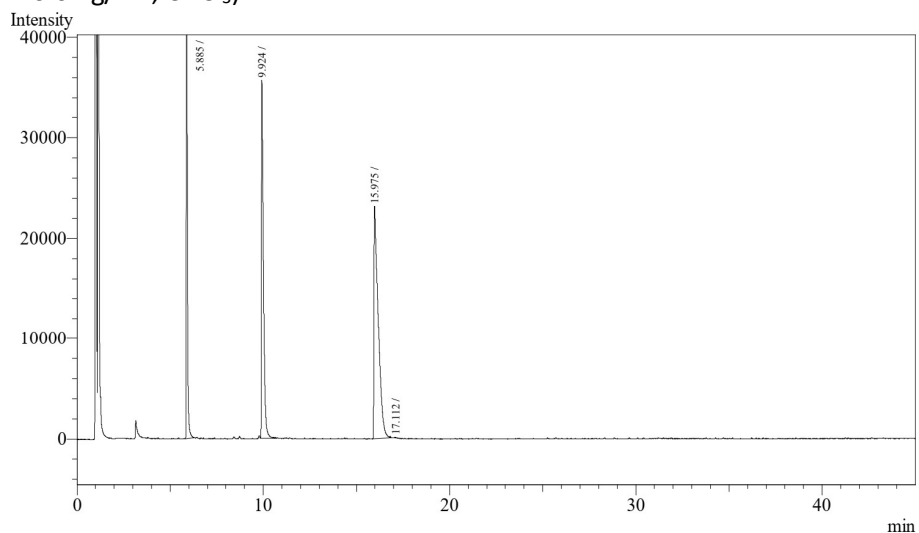

| Peak# | Ret.Time | Area   | Height | Conc.  | Unit | Mark | ID# | Cmpd Name |
|-------|----------|--------|--------|--------|------|------|-----|-----------|
| 1     | 5.885    | 205393 | 51678  | 24.410 |      |      |     |           |
| 2     | 9.924    | 267491 | 35628  | 31.790 |      | S    |     |           |
| 3     | 15.975   | 368128 | 23180  | 43.750 |      | S    |     |           |
| 4     | 17.112   | 423    | 73     | 0.050  |      |      |     |           |
| Total |          | 841435 | 110559 |        |      |      |     |           |

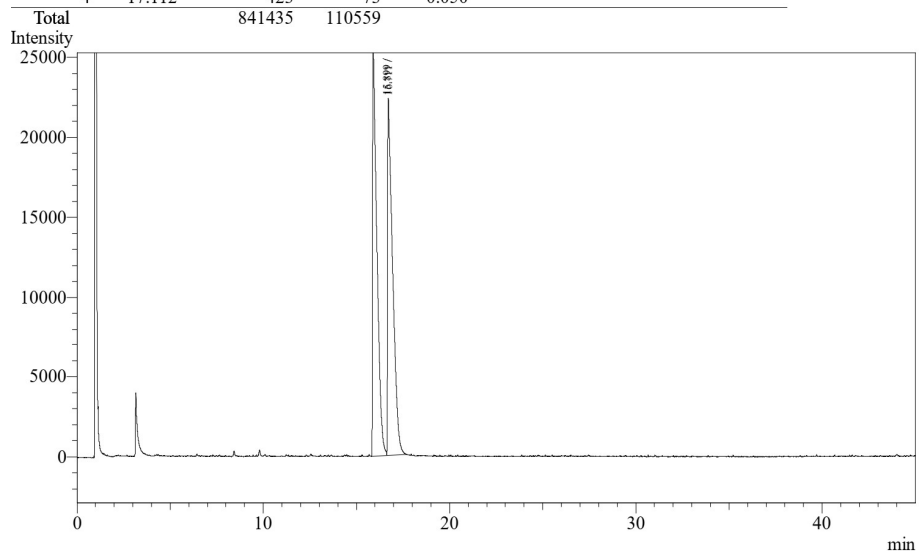

| Peak# | Ret.Time | Area   | Height | Conc.  | Unit | Mark | ID# | Cmpd Name |
|-------|----------|--------|--------|--------|------|------|-----|-----------|
| 1     | 15.899   | 413427 | 25927  | 49.935 |      |      |     |           |
| 2     | 16.711   | 414501 | 22359  | 50.065 |      | SV   |     |           |
| Total |          | 827928 | 48286  |        |      |      |     |           |

**Figure S29.** Gas chromatogram of catalytic mixture (top) and racemic mixture (bottom) of 1-tetralol.

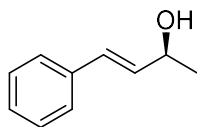

*trans*-4-phenyl-3-buten-2-ol

Gas chromatograph was developed using following condition:

Carrier gas H<sub>2</sub>, Injector temperature: 250°C, Split ratio: 50, column flow: 0.98 mL/min, progression: 125/20-5-140/25, detector temperature: 275°C, t<sub>maj</sub>: 20.7 min, t<sub>min</sub>: 20.3 min, t<sub>SM</sub>: 8.1 min

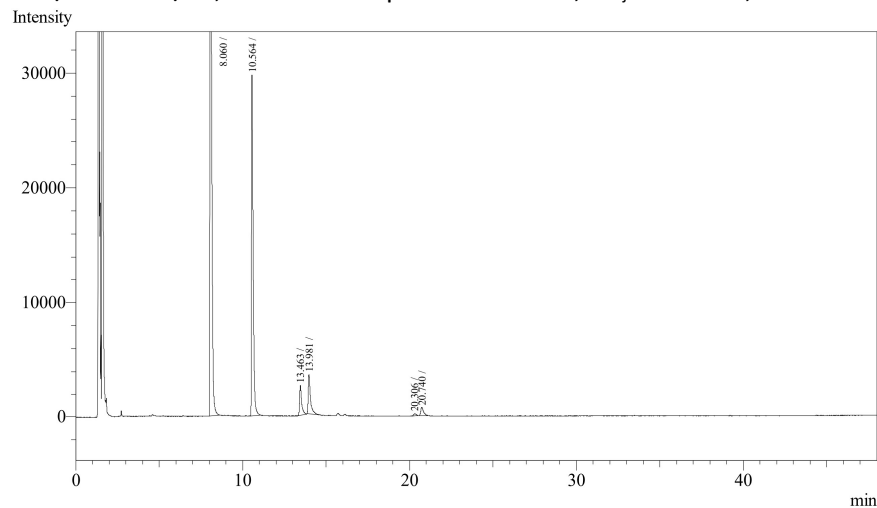

| Peak# | Ret.Time | Area   | Height | Conc.  | Unit | Mark | ID# | Cmpd Name |
|-------|----------|--------|--------|--------|------|------|-----|-----------|
| 1     | 8.060    | 459866 | 69724  | 63.296 |      |      |     |           |
| 2     | 10.564   | 200418 | 29732  | 27.586 |      |      |     |           |
| 3     | 13.463   | 22950  | 2655   | 3.159  |      |      |     |           |
| 4     | 13.981   | 33181  | 3519   | 4.567  |      |      |     |           |
| 5     | 20.306   | 1918   | 186    | 0.264  |      |      |     |           |
| 6     | 20.740   | 8200   | 726    | 1.129  |      |      |     |           |
| Total |          | 726533 | 106542 |        |      |      |     |           |

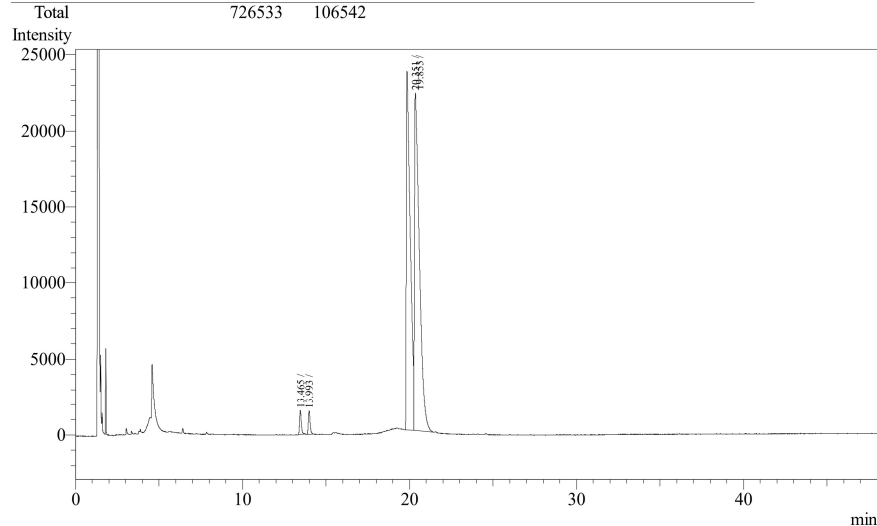

| Peak# | Ret.Time | Area   | Height | Conc.  | Unit | Mark | ID# | Cmpd Name |
|-------|----------|--------|--------|--------|------|------|-----|-----------|
| 1     | 13.465   | 10911  | 1572   | 1.266  |      |      |     |           |
| 2     | 13.993   | 11139  | 1531   | 1.293  |      |      |     |           |
| 3     | 19.853   | 385350 | 23580  | 44.718 |      |      |     |           |
| 4     | 20.351   | 454342 | 22217  | 52.724 |      | V    |     |           |
| Total |          | 861742 | 48900  |        |      |      |     |           |

**Figure S30.** Gas chromatogram of catalytic mixture (top) and racemic mixture (bottom) of *trans*-4-phenyl-3-buten-2-ol.

## Calculations

In order for comparison with past work with iron catalysts,<sup>3</sup> the calculations were standardized using Gaussian09<sup>4</sup> with the functional M11L and basis set 6-31G\*\* for all non-metal elements and SDD for the manganese. An ultrafine integration grid, a temperature of 353 K and the smd toluene solvation model were employed during optimization. An entropy value of 17.2 eu was used for dihydrogen<sup>5</sup> in toluene at 353 K instead of the gas phase (1 atm, 353 K) value of 32.3 eu (provided by the Gaussian09 calculation) in order to obtain exoergic hydrogenation reactions as observed experimentally (Table S1). This may still have an error of up to 3 eu but there is no experimental value for comparison. Transition states were located using the qst3 method and verified using IRC calculations. The Python program Goodvibes was used to correct for frequency modes of less than 50 cm<sup>-1</sup> using the Truhlar method.<sup>5</sup>

Table S1. Free energies of hydrogenation of the ketones using an entropy of 17.2 eu for H<sub>2</sub> at 353 K, corrected from the gas phase value of 32.3 eu.

| Ketone                                                                | $\Delta G^{\text{hydrog}}$ kcal/mol with $S = 32.3$ | $\Delta G^{\text{hydrog}}$ kcal/mol with $S = 17.2$ |
|-----------------------------------------------------------------------|-----------------------------------------------------|-----------------------------------------------------|
| MeCOPh                                                                | 1.6                                                 | -3.7                                                |
| MeCOC <sub>6</sub> H <sub>2</sub> (3,5-CF <sub>3</sub> ) <sub>2</sub> | 0.5                                                 | -4.8                                                |
| CF <sub>3</sub> COPh                                                  | -6.2                                                | -11.6                                               |
| MeCO(2-C <sub>5</sub> H <sub>4</sub> N)                               | 2.0                                                 | -3.3                                                |
| 1-indanone                                                            | 5.6                                                 | 0.2                                                 |

Energies, transition state wavenumbers, Cartesian coordinates.

1Mn

$\Delta H^{353}$  -2387.243149 Hartrees,  $\Delta S^{353}$  274.6 eu,  $\Delta G^{353}$  -2387.397628 Hartrees

```

15  3.387031000  0.553181000  0.350720000
 1  3.548443000  2.967066000  0.631155000
 6 -1.555304000  0.649300000  -0.166249000
 6  1.269741000 -0.726207000  2.085736000
 1 -1.567220000  0.973401000  -1.225021000
25  1.403388000 -0.488305000  0.354883000
 8  1.151156000 -0.772732000  3.232719000
 1 -0.870196000  1.582873000  1.659337000
 6 -0.626486000  1.632154000  0.562604000
 1  3.356520000  2.131878000  2.164557000
 6  2.999728000  2.144140000  1.122106000
15 -0.707407000 -0.996720000  -0.239172000
 6  4.922506000 -0.027068000  1.183148000
 1  5.621485000  0.835498000  1.203382000
 6  3.839824000  1.068945000  -1.366261000
 1  3.040812000  1.812789000  -1.573922000
 6  1.494334000  2.362419000  1.072530000
 1  1.299368000  3.363970000  0.636075000
 1  1.102592000  2.443168000  2.119492000
 7  0.765608000  1.333870000  0.369749000
 6  5.171272000  1.772047000  -1.491646000
 1  5.272890000  2.226582000  -2.490913000
 1  5.296447000  2.585071000  -0.758511000

```

|   |              |              |              |
|---|--------------|--------------|--------------|
| 1 | 6.024159000  | 1.085263000  | -1.369256000 |
| 6 | 3.679172000  | -0.046025000 | -2.375500000 |
| 1 | 2.655197000  | -0.458372000 | -2.372185000 |
| 1 | 3.875732000  | 0.323679000  | -3.395538000 |
| 1 | 4.367673000  | -0.888262000 | -2.197810000 |
| 6 | 4.610857000  | -0.438588000 | 2.605728000  |
| 1 | 5.540895000  | -0.676038000 | 3.147351000  |
| 1 | 4.085181000  | 0.333626000  | 3.188178000  |
| 1 | 3.983759000  | -1.345942000 | 2.623403000  |
| 6 | 5.583732000  | -1.179929000 | 0.460068000  |
| 1 | 4.902018000  | -2.040919000 | 0.362379000  |
| 1 | 5.942080000  | -0.923665000 | -0.546932000 |
| 1 | 6.459353000  | -1.530407000 | 1.030963000  |
| 6 | -0.959485000 | -1.498453000 | -1.980757000 |
| 6 | -2.061600000 | -1.094410000 | -2.731788000 |
| 6 | -0.029875000 | -2.344872000 | -2.580706000 |
| 6 | -2.222650000 | -1.514776000 | -4.039893000 |
| 6 | -0.191732000 | -2.766639000 | -3.888805000 |
| 6 | -1.286061000 | -2.349113000 | -4.624355000 |
| 1 | -2.823033000 | -0.442656000 | -2.290713000 |
| 1 | 0.838433000  | -2.693532000 | -2.014406000 |
| 1 | -3.096408000 | -1.184603000 | -4.609324000 |
| 1 | 0.553191000  | -3.429800000 | -4.337870000 |
| 1 | -1.412142000 | -2.677643000 | -5.659883000 |
| 6 | -1.700135000 | -2.257285000 | 0.620206000  |
| 6 | -3.029631000 | -2.513612000 | 0.287854000  |
| 6 | -1.096879000 | -3.030024000 | 1.606378000  |
| 6 | -3.739050000 | -3.500043000 | 0.944302000  |
| 6 | -1.807336000 | -4.023065000 | 2.259952000  |
| 6 | -3.130179000 | -4.255353000 | 1.933807000  |
| 1 | -3.527400000 | -1.927223000 | -0.492035000 |
| 1 | -0.045730000 | -2.861636000 | 1.859323000  |
| 1 | -4.783764000 | -3.683447000 | 0.677777000  |
| 1 | -1.315132000 | -4.623026000 | 3.030481000  |
| 1 | -3.693420000 | -5.038521000 | 2.449689000  |
| 6 | -2.953641000 | 0.719097000  | 0.360151000  |
| 6 | -3.247978000 | 0.349259000  | 1.670510000  |
| 6 | -3.986076000 | 1.207092000  | -0.433070000 |
| 6 | -4.536798000 | 0.442803000  | 2.160768000  |
| 6 | -5.278451000 | 1.299581000  | 0.054333000  |
| 6 | -5.558666000 | 0.912823000  | 1.352473000  |
| 1 | -2.450602000 | -0.035385000 | 2.317729000  |
| 1 | -3.761323000 | 1.545369000  | -1.452081000 |
| 1 | -4.746796000 | 0.140435000  | 3.190791000  |
| 1 | -6.073863000 | 1.690419000  | -0.587127000 |
| 1 | -6.578528000 | 0.985435000  | 1.740971000  |
| 6 | -1.041212000 | 3.020537000  | 0.107407000  |
| 6 | -1.877358000 | 3.810966000  | 0.880729000  |

|   |              |              |              |
|---|--------------|--------------|--------------|
| 6 | -0.637814000 | 3.495219000  | -1.135933000 |
| 6 | -2.303830000 | 5.048339000  | 0.426852000  |
| 6 | -1.053466000 | 4.732809000  | -1.588949000 |
| 6 | -1.891868000 | 5.513841000  | -0.808653000 |
| 1 | -2.205141000 | 3.441344000  | 1.860087000  |
| 1 | 0.034718000  | 2.876373000  | -1.743870000 |
| 1 | -2.966008000 | 5.657927000  | 1.049416000  |
| 1 | -0.718568000 | 5.096861000  | -2.565618000 |
| 1 | -2.222664000 | 6.493443000  | -1.166468000 |
| 6 | 2.078101000  | -2.116312000 | 0.051304000  |
| 8 | 2.516895000  | -3.177935000 | -0.083329000 |

### 3TS

$\Delta H^{353}$  -2387.232044 Hartrees,  $\Delta S^{353}$  270.4 eu,  $\Delta G^{353}$  -2387.384168 Hartrees,  $93i$  cm<sup>-1</sup>

|    |              |              |              |
|----|--------------|--------------|--------------|
| 15 | 3.387031000  | 0.553181000  | 0.350720000  |
| 1  | 3.548443000  | 2.967066000  | 0.631155000  |
| 6  | -1.555304000 | 0.649300000  | -0.166249000 |
| 6  | 1.269741000  | -0.726207000 | 2.085736000  |
| 1  | -1.567220000 | 0.973401000  | -1.225021000 |
| 25 | 1.403388000  | -0.488305000 | 0.354883000  |
| 8  | 1.151156000  | -0.772732000 | 3.232719000  |
| 1  | -0.870196000 | 1.582873000  | 1.659337000  |
| 6  | -0.626486000 | 1.632154000  | 0.562604000  |
| 1  | 3.356520000  | 2.131878000  | 2.164557000  |
| 6  | 2.999728000  | 2.144140000  | 1.122106000  |
| 15 | -0.707407000 | -0.996720000 | -0.239172000 |
| 6  | 4.922506000  | -0.027068000 | 1.183148000  |
| 1  | 5.621485000  | 0.835498000  | 1.203382000  |
| 6  | 3.839824000  | 1.068945000  | -1.366261000 |
| 1  | 3.040812000  | 1.812789000  | -1.573922000 |
| 6  | 1.494334000  | 2.362419000  | 1.072530000  |
| 1  | 1.299368000  | 3.363970000  | 0.636075000  |
| 1  | 1.102592000  | 2.443168000  | 2.119492000  |
| 7  | 0.765608000  | 1.333870000  | 0.369749000  |
| 6  | 5.171272000  | 1.772047000  | -1.491646000 |
| 1  | 5.272890000  | 2.226582000  | -2.490913000 |
| 1  | 5.296447000  | 2.585071000  | -0.758511000 |
| 1  | 6.024159000  | 1.085263000  | -1.369256000 |
| 6  | 3.679172000  | -0.046025000 | -2.375500000 |
| 1  | 2.655197000  | -0.458372000 | -2.372185000 |
| 1  | 3.875732000  | 0.323679000  | -3.395538000 |
| 1  | 4.367673000  | -0.888262000 | -2.197810000 |
| 6  | 4.610857000  | -0.438588000 | 2.605728000  |
| 1  | 5.540895000  | -0.676038000 | 3.147351000  |
| 1  | 4.085181000  | 0.333626000  | 3.188178000  |
| 1  | 3.983759000  | -1.345942000 | 2.623403000  |
| 6  | 5.583732000  | -1.179929000 | 0.460068000  |
| 1  | 4.902018000  | -2.040919000 | 0.362379000  |

|   |              |              |              |
|---|--------------|--------------|--------------|
| 1 | 5.942080000  | -0.923665000 | -0.546932000 |
| 1 | 6.459353000  | -1.530407000 | 1.030963000  |
| 6 | -0.959485000 | -1.498453000 | -1.980757000 |
| 6 | -2.061600000 | -1.094410000 | -2.731788000 |
| 6 | -0.029875000 | -2.344872000 | -2.580706000 |
| 6 | -2.222650000 | -1.514776000 | -4.039893000 |
| 6 | -0.191732000 | -2.766639000 | -3.888805000 |
| 6 | -1.286061000 | -2.349113000 | -4.624355000 |
| 1 | -2.823033000 | -0.442656000 | -2.290713000 |
| 1 | 0.838433000  | -2.693532000 | -2.014406000 |
| 1 | -3.096408000 | -1.184603000 | -4.609324000 |
| 1 | 0.553191000  | -3.429800000 | -4.337870000 |
| 1 | -1.412142000 | -2.677643000 | -5.659883000 |
| 6 | -1.700135000 | -2.257285000 | 0.620206000  |
| 6 | -3.029631000 | -2.513612000 | 0.287854000  |
| 6 | -1.096879000 | -3.030024000 | 1.606378000  |
| 6 | -3.739050000 | -3.500043000 | 0.944302000  |
| 6 | -1.807336000 | -4.023065000 | 2.259952000  |
| 6 | -3.130179000 | -4.255353000 | 1.933807000  |
| 1 | -3.527400000 | -1.927223000 | -0.492035000 |
| 1 | -0.045730000 | -2.861636000 | 1.859323000  |
| 1 | -4.783764000 | -3.683447000 | 0.677777000  |
| 1 | -1.315132000 | -4.623026000 | 3.030481000  |
| 1 | -3.693420000 | -5.038521000 | 2.449689000  |
| 6 | -2.953641000 | 0.719097000  | 0.360151000  |
| 6 | -3.247978000 | 0.349259000  | 1.670510000  |
| 6 | -3.986076000 | 1.207092000  | -0.433070000 |
| 6 | -4.536798000 | 0.442803000  | 2.160768000  |
| 6 | -5.278451000 | 1.299581000  | 0.054333000  |
| 6 | -5.558666000 | 0.912823000  | 1.352473000  |
| 1 | -2.450602000 | -0.035385000 | 2.317729000  |
| 1 | -3.761323000 | 1.545369000  | -1.452081000 |
| 1 | -4.746796000 | 0.140435000  | 3.190791000  |
| 1 | -6.073863000 | 1.690419000  | -0.587127000 |
| 1 | -6.578528000 | 0.985435000  | 1.740971000  |
| 6 | -1.041212000 | 3.020537000  | 0.107407000  |
| 6 | -1.877358000 | 3.810966000  | 0.880729000  |
| 6 | -0.637814000 | 3.495219000  | -1.135933000 |
| 6 | -2.303830000 | 5.048339000  | 0.426852000  |
| 6 | -1.053466000 | 4.732809000  | -1.588949000 |
| 6 | -1.891868000 | 5.513841000  | -0.808653000 |
| 1 | -2.205141000 | 3.441344000  | 1.860087000  |
| 1 | 0.034718000  | 2.876373000  | -1.743870000 |
| 1 | -2.966008000 | 5.657927000  | 1.049416000  |
| 1 | -0.718568000 | 5.096861000  | -2.565618000 |
| 1 | -2.222664000 | 6.493443000  | -1.166468000 |
| 6 | 2.078101000  | -2.116312000 | 0.051304000  |
| 8 | 2.516895000  | -3.177935000 | -0.083329000 |



## 6Mn

$\Delta H^{353}$  -2387.234535 Hartrees  $\Delta S^{353}$  272.9 eu  $\Delta G^{353}$  -2387.388064 Hartrees

|    |              |              |              |
|----|--------------|--------------|--------------|
| 1  | 6.186344000  | 1.486464000  | 0.100439000  |
| 1  | 4.311226000  | 0.222424000  | -3.549659000 |
| 1  | -3.683945000 | -1.271295000 | -2.618699000 |
| 6  | -4.637101000 | -0.995162000 | -2.139057000 |
| 6  | 0.605133000  | 1.673890000  | -0.327121000 |
| 15 | 0.745931000  | -0.991375000 | 0.310282000  |
| 6  | -2.993883000 | 2.218014000  | 0.163026000  |
| 1  | -0.800471000 | -2.604710000 | 2.140355000  |
| 1  | 3.365205000  | -1.398932000 | 4.529359000  |
| 6  | 3.031595000  | 0.403596000  | -1.837444000 |
| 7  | -0.742433000 | 1.348931000  | 0.048460000  |
| 1  | 3.571938000  | -1.931311000 | 0.372124000  |
| 6  | 1.704993000  | -3.917654000 | -2.362915000 |
| 1  | -0.033054000 | -2.782309000 | -1.820340000 |
| 6  | 5.388328000  | 0.850264000  | -1.794285000 |
| 6  | -2.010437000 | -2.140612000 | -0.059130000 |
| 1  | 3.005760000  | -0.593752000 | 2.240494000  |
| 6  | -4.580117000 | 0.411373000  | -1.578344000 |
| 6  | 1.683609000  | -2.226883000 | -0.642188000 |
| 6  | 2.234901000  | -1.211474000 | 2.714790000  |
| 6  | 3.044505000  | -4.157392000 | -2.122026000 |
| 6  | -1.604500000 | 2.415650000  | -0.380465000 |
| 1  | 1.172141000  | -4.484012000 | -3.131913000 |
| 1  | 3.580823000  | -4.913081000 | -2.703427000 |
| 6  | 4.249611000  | 0.472260000  | -2.486510000 |
| 25 | -1.385593000 | -0.464953000 | -0.163193000 |
| 1  | -4.875783000 | 1.289034000  | -3.522028000 |
| 15 | -3.451448000 | 0.483261000  | -0.116948000 |
| 1  | -1.635867000 | 2.486327000  | -1.500084000 |
| 1  | 6.352440000  | 0.902616000  | -2.308213000 |
| 1  | -5.419586000 | -1.067361000 | -2.912340000 |
| 6  | 4.074388000  | 1.102464000  | 0.195444000  |
| 1  | -4.217627000 | 2.436062000  | -2.345379000 |
| 1  | 1.768352000  | 0.918804000  | 1.281752000  |
| 6  | -4.186062000 | 1.384655000  | -2.666987000 |
| 6  | 1.029448000  | -2.957961000 | -1.627796000 |
| 1  | -5.591885000 | 0.688912000  | -1.217339000 |
| 6  | 3.030840000  | -2.489763000 | -0.398855000 |
| 6  | 2.926579000  | 0.707148000  | -0.481955000 |
| 1  | 3.999551000  | 1.383668000  | 1.252978000  |
| 8  | -2.400551000 | -3.228768000 | -0.054378000 |
| 6  | 1.609778000  | 0.645426000  | 0.221210000  |
| 6  | 1.069640000  | -1.536090000 | 2.023335000  |
| 6  | 5.296411000  | 1.169712000  | -0.451507000 |
| 1  | 0.703764000  | 1.684997000  | -1.447032000 |

|   |              |              |              |
|---|--------------|--------------|--------------|
| 6 | 0.330291000  | -2.785806000 | 3.953106000  |
| 1 | 1.653830000  | -2.806983000 | 5.649953000  |
| 1 | -1.241385000 | 3.409885000  | -0.049337000 |
| 1 | -3.173806000 | 1.180945000  | -3.053281000 |
| 1 | -2.956966000 | 2.355396000  | 1.260165000  |
| 1 | -0.428512000 | -3.407812000 | 4.436477000  |
| 6 | 1.490122000  | -2.452149000 | 4.628468000  |
| 6 | 0.121741000  | -2.330654000 | 2.662879000  |
| 1 | -4.851922000 | -1.765805000 | -1.384059000 |
| 1 | 2.139622000  | 0.087378000  | -2.392676000 |
| 6 | 2.442884000  | -1.665140000 | 4.004756000  |
| 1 | 4.764763000  | -3.629525000 | -0.938248000 |
| 1 | -3.714515000 | 2.954893000  | -0.228817000 |
| 6 | 3.705635000  | -3.442263000 | -1.136421000 |
| 6 | -4.542748000 | 0.134727000  | 1.337288000  |
| 1 | -6.338020000 | 1.235006000  | 0.769176000  |
| 6 | -5.179867000 | -1.235109000 | 1.309360000  |
| 6 | -5.593003000 | 1.195938000  | 1.581361000  |
| 1 | -4.461347000 | -2.047344000 | 1.123254000  |
| 1 | -3.823680000 | 0.160712000  | 2.183470000  |
| 1 | -5.667365000 | -1.447119000 | 2.274906000  |
| 1 | -5.968611000 | -1.299917000 | 0.540831000  |
| 1 | -5.176041000 | 2.206990000  | 1.698339000  |
| 1 | -6.150795000 | 0.970227000  | 2.505487000  |
| 6 | 1.094096000  | 3.029722000  | 0.147584000  |
| 6 | 1.814861000  | 3.865758000  | -0.691089000 |
| 6 | 0.881834000  | 3.427095000  | 1.463596000  |
| 6 | 2.313726000  | 5.073627000  | -0.231163000 |
| 6 | 1.369805000  | 4.635095000  | 1.923969000  |
| 6 | 2.090456000  | 5.463154000  | 1.076979000  |
| 1 | 1.992232000  | 3.555874000  | -1.728111000 |
| 1 | 0.300193000  | 2.772020000  | 2.124646000  |
| 1 | 2.882322000  | 5.720326000  | -0.906467000 |
| 1 | 1.185296000  | 4.939316000  | 2.959245000  |
| 1 | 2.478045000  | 6.419311000  | 1.441113000  |
| 6 | -1.201100000 | -0.517125000 | -1.905877000 |
| 8 | -1.027126000 | -0.461642000 | -3.045948000 |

H<sub>2</sub>

$\Delta H^{353}$  -1.164092 Hartrees  $\Delta S^{353}$  17.2 eu  $\Delta G^{353}$  -1.174287 Hartrees

|   |             |             |              |
|---|-------------|-------------|--------------|
| 1 | 0.000000000 | 0.000000000 | 0.374939000  |
| 1 | 0.000000000 | 0.000000000 | -0.374939000 |

1TS<sup>H2</sup>

$\Delta H^{353}$  -2388.388076 Hartrees,  $\Delta S^{353}$  272.9 eu,  $\Delta G^{353}$  -2388.541617 Hartrees, 914.6075i cm<sup>-1</sup>

|   |              |              |              |
|---|--------------|--------------|--------------|
| 1 | 6.152360000  | 1.444885000  | 0.566432000  |
| 1 | 4.513710000  | 0.487745000  | -3.285015000 |
| 1 | -3.732424000 | -1.016005000 | -2.629181000 |
| 6 | -4.681073000 | -0.757247000 | -2.131013000 |

|    |              |              |              |
|----|--------------|--------------|--------------|
| 6  | 0.639266000  | 1.665651000  | -0.194405000 |
| 15 | 0.694885000  | -1.057918000 | 0.248395000  |
| 6  | -2.964195000 | 2.266878000  | 0.363288000  |
| 1  | -0.785084000 | -2.898085000 | 1.898595000  |
| 1  | 3.460202000  | -2.009072000 | 4.286213000  |
| 6  | 3.133434000  | 0.503952000  | -1.643408000 |
| 7  | -0.698664000 | 1.457411000  | 0.251148000  |
| 1  | 3.501859000  | -2.056766000 | 0.132450000  |
| 6  | 1.537650000  | -3.663151000 | -2.777662000 |
| 1  | -0.160852000 | -2.560447000 | -2.071180000 |
| 6  | 5.477015000  | 0.969816000  | -1.421018000 |
| 6  | -2.087539000 | -2.098707000 | -0.190680000 |
| 1  | 3.022145000  | -0.903709000 | 2.141240000  |
| 6  | -4.601686000 | 0.608083000  | -1.478950000 |
| 6  | 1.590428000  | -2.179555000 | -0.874809000 |
| 6  | 2.268851000  | -1.584807000 | 2.551744000  |
| 6  | 2.874264000  | -3.961807000 | -2.593284000 |
| 6  | -1.578576000 | 2.493921000  | -0.183605000 |
| 1  | 0.976319000  | -4.125642000 | -3.594301000 |
| 1  | 3.379673000  | -4.659008000 | -3.267981000 |
| 6  | 4.386675000  | 0.642765000  | -2.209688000 |
| 25 | -1.434075000 | -0.444687000 | -0.120788000 |
| 1  | -4.919671000 | 1.623896000  | -3.349946000 |
| 15 | -3.460741000 | 0.557331000  | -0.024042000 |
| 1  | -1.616627000 | 2.535496000  | -1.304365000 |
| 1  | 6.468583000  | 1.076836000  | -1.869992000 |
| 1  | -5.465500000 | -0.767611000 | -2.905692000 |
| 6  | 4.044924000  | 1.033053000  | 0.500366000  |
| 1  | -4.222010000 | 2.675660000  | -2.109651000 |
| 1  | 1.676372000  | 0.761318000  | 1.428100000  |
| 6  | -4.212488000 | 1.648742000  | -2.504300000 |
| 6  | 0.900727000  | -2.778354000 | -1.923593000 |
| 1  | -5.606387000 | 0.870061000  | -1.088926000 |
| 6  | 2.933533000  | -2.505212000 | -0.688943000 |
| 6  | 2.944365000  | 0.687067000  | -0.275604000 |
| 1  | 3.903673000  | 1.224160000  | 1.571135000  |
| 8  | -2.501548000 | -3.173592000 | -0.269069000 |
| 6  | 1.584728000  | 0.576091000  | 0.338505000  |
| 6  | 1.081585000  | -1.819588000 | 1.862553000  |
| 6  | 5.301618000  | 1.168563000  | -0.063335000 |
| 1  | 0.678430000  | 1.626809000  | -1.317612000 |
| 6  | 0.414840000  | -3.332534000 | 3.621680000  |
| 1  | 1.796850000  | -3.578189000 | 5.254121000  |
| 1  | -1.226683000 | 3.498081000  | 0.135470000  |
| 1  | -3.211493000 | 1.458901000  | -2.924391000 |
| 1  | -2.925511000 | 2.340138000  | 1.467306000  |
| 1  | -0.325082000 | -4.021268000 | 4.039494000  |
| 6  | 1.596164000  | -3.085558000 | 4.298440000  |

|   |              |              |              |
|---|--------------|--------------|--------------|
| 6 | 0.158692000  | -2.702188000 | 2.417143000  |
| 1 | -4.906564000 | -1.572013000 | -1.426443000 |
| 1 | 2.282153000  | 0.230320000  | -2.278123000 |
| 6 | 2.522286000  | -2.209926000 | 3.760172000  |
| 1 | 4.626577000  | -3.618800000 | -1.388494000 |
| 1 | -3.673250000 | 3.038737000  | 0.022572000  |
| 6 | 3.570196000  | -3.382530000 | -1.544425000 |
| 6 | -4.562483000 | 0.165124000  | 1.409481000  |
| 1 | -5.208781000 | 2.225179000  | 1.812607000  |
| 6 | -5.190175000 | -1.206767000 | 1.333326000  |
| 6 | -5.618766000 | 1.212026000  | 1.685803000  |
| 1 | -4.461445000 | -2.006313000 | 1.131988000  |
| 1 | -3.844927000 | 0.164977000  | 2.256082000  |
| 1 | -5.686695000 | -1.451921000 | 2.286386000  |
| 1 | -5.969630000 | -1.255850000 | 0.554037000  |
| 1 | -6.157917000 | 0.966586000  | 2.616023000  |
| 1 | -6.380327000 | 1.258205000  | 0.889745000  |
| 6 | 1.214655000  | 3.006239000  | 0.217559000  |
| 6 | 1.921285000  | 3.792381000  | -0.679801000 |
| 6 | 1.082745000  | 3.444908000  | 1.530006000  |
| 6 | 2.489861000  | 4.989223000  | -0.277591000 |
| 6 | 1.643300000  | 4.642151000  | 1.934126000  |
| 6 | 2.352003000  | 5.417876000  | 1.030435000  |
| 1 | 2.033285000  | 3.450636000  | -1.715763000 |
| 1 | 0.507894000  | 2.834513000  | 2.237628000  |
| 1 | 3.046372000  | 5.596637000  | -0.997736000 |
| 1 | 1.524035000  | 4.978943000  | 2.968771000  |
| 1 | 2.796302000  | 6.365516000  | 1.348917000  |
| 6 | -1.240732000 | -0.292802000 | -1.885482000 |
| 8 | -1.076724000 | -0.130867000 | -3.015760000 |
| 1 | -1.087738000 | 0.607709000  | 1.218032000  |
| 1 | -1.479905000 | -0.224145000 | 1.558282000  |

## 5Mn

$\Delta H^{353}$  -2388.416589 Hartrees,  $\Delta S^{353}$  272.75 eu,  $\Delta G^{353}$  -2388.570027 Hartrees

|    |              |              |              |
|----|--------------|--------------|--------------|
| 1  | 6.179733000  | 1.152964000  | 0.686352000  |
| 1  | 4.463764000  | 0.618552000  | -3.212880000 |
| 1  | -3.945263000 | -0.875301000 | -2.574426000 |
| 6  | -4.867487000 | -0.466694000 | -2.126093000 |
| 6  | 0.664755000  | 1.690402000  | -0.043620000 |
| 15 | 0.631395000  | -1.067079000 | 0.225529000  |
| 6  | -2.979756000 | 2.225207000  | 0.571227000  |
| 1  | -0.815601000 | -3.117468000 | 1.571522000  |
| 1  | 3.193385000  | -2.277537000 | 4.353128000  |
| 6  | 3.097039000  | 0.580954000  | -1.560991000 |
| 7  | -0.701782000 | 1.451357000  | 0.406462000  |
| 1  | 3.398367000  | -2.198436000 | 0.274761000  |
| 6  | 1.715639000  | -3.300767000 | -3.019321000 |

|    |              |              |              |
|----|--------------|--------------|--------------|
| 1  | -0.016387000 | -2.229380000 | -2.341179000 |
| 6  | 5.465076000  | 0.886615000  | -1.325917000 |
| 6  | -2.074848000 | -2.041818000 | -0.553990000 |
| 1  | 2.848238000  | -0.982423000 | 2.300708000  |
| 6  | -4.589162000 | 0.833111000  | -1.403572000 |
| 6  | 1.603433000  | -2.098569000 | -0.929329000 |
| 6  | 2.103488000  | -1.734150000 | 2.583428000  |
| 6  | 3.016941000  | -3.676827000 | -2.745139000 |
| 6  | -1.600066000 | 2.543029000  | 0.060380000  |
| 1  | 1.232139000  | -3.621393000 | -3.946641000 |
| 1  | 3.573243000  | -4.293238000 | -3.457541000 |
| 6  | 4.352342000  | 0.692457000  | -2.127393000 |
| 25 | -1.442719000 | -0.426851000 | -0.218302000 |
| 1  | -4.782525000 | 1.990360000  | -3.207902000 |
| 15 | -3.433061000 | 0.540014000  | 0.014267000  |
| 1  | -1.592761000 | 2.629385000  | -1.043469000 |
| 1  | 6.458742000  | 0.970136000  | -1.775020000 |
| 1  | -5.586986000 | -0.310242000 | -2.947082000 |
| 6  | 4.050618000  | 0.875971000  | 0.609453000  |
| 1  | -3.918607000 | 2.855913000  | -1.933173000 |
| 1  | 1.671359000  | 0.673453000  | 1.530586000  |
| 6  | -4.064285000 | 1.860648000  | -2.380985000 |
| 6  | 1.014614000  | -2.517354000 | -2.117345000 |
| 1  | -5.538843000 | 1.222818000  | -0.985585000 |
| 6  | 2.909373000  | -2.503227000 | -0.656595000 |
| 6  | 2.928151000  | 0.659051000  | -0.180441000 |
| 1  | 3.929360000  | 0.981154000  | 1.694360000  |
| 8  | -2.484133000 | -3.104755000 | -0.754082000 |
| 6  | 1.567217000  | 0.548157000  | 0.433094000  |
| 6  | 0.983031000  | -1.952402000 | 1.787171000  |
| 6  | 5.309975000  | 0.982460000  | 0.045094000  |
| 1  | 0.624505000  | 1.680620000  | -1.151849000 |
| 6  | 0.290605000  | -3.683514000 | 3.321503000  |
| 1  | 1.565404000  | -4.028545000 | 5.023033000  |
| 1  | -1.245679000 | 3.513093000  | 0.460353000  |
| 1  | -3.111479000 | 1.550171000  | -2.837624000 |
| 1  | -2.965194000 | 2.222821000  | 1.677946000  |
| 1  | -0.431775000 | -4.454096000 | 3.606189000  |
| 6  | 1.403226000  | -3.446928000 | 4.110969000  |
| 6  | 0.079748000  | -2.938721000 | 2.176460000  |
| 1  | -5.284305000 | -1.249041000 | -1.473682000 |
| 1  | 2.228521000  | 0.400882000  | -2.206610000 |
| 6  | 2.308238000  | -2.469833000 | 3.739265000  |
| 1  | 4.639132000  | -3.576545000 | -1.331473000 |
| 1  | -3.699286000 | 3.007544000  | 0.277527000  |
| 6  | 3.611641000  | -3.277954000 | -1.558829000 |
| 6  | -4.525195000 | -0.000560000 | 1.410788000  |
| 1  | -6.555228000 | 0.511218000  | 0.805926000  |

|   |              |              |              |
|---|--------------|--------------|--------------|
| 6 | -4.797523000 | -1.485547000 | 1.444151000  |
| 6 | -5.803886000 | 0.790573000  | 1.563432000  |
| 1 | -3.871345000 | -2.077197000 | 1.412785000  |
| 1 | -3.871977000 | 0.223232000  | 2.279499000  |
| 1 | -5.326583000 | -1.751768000 | 2.374625000  |
| 1 | -5.441017000 | -1.816263000 | 0.612677000  |
| 1 | -5.653742000 | 1.881034000  | 1.496517000  |
| 1 | -6.263544000 | 0.589511000  | 2.545540000  |
| 1 | -0.694466000 | 1.370599000  | 1.426218000  |
| 6 | 1.241214000  | 3.016606000  | 0.388602000  |
| 6 | 1.794928000  | 3.880025000  | -0.544945000 |
| 6 | 1.255744000  | 3.385520000  | 1.729533000  |
| 6 | 2.351319000  | 5.085308000  | -0.152759000 |
| 6 | 1.801787000  | 4.592678000  | 2.124217000  |
| 6 | 2.353313000  | 5.445952000  | 1.182581000  |
| 1 | 1.795282000  | 3.592757000  | -1.602756000 |
| 1 | 0.826797000  | 2.718260000  | 2.488607000  |
| 1 | 2.787125000  | 5.752326000  | -0.902066000 |
| 1 | 1.799806000  | 4.871143000  | 3.182108000  |
| 1 | 2.788449000  | 6.399553000  | 1.494476000  |
| 6 | -1.158007000 | -0.029764000 | -1.936148000 |
| 1 | -1.688742000 | -0.670263000 | 1.325442000  |
| 8 | -0.962868000 | 0.213105000  | -3.053692000 |

2TS<sup>H2</sup>

$\Delta H^{353}$  -2388.381058 Hartrees,  $\Delta S^{353}$  273.2 eu,  $\Delta G^{353}$  -2388.534774 Hartrees, 538i cm<sup>-1</sup>

|    |              |              |              |
|----|--------------|--------------|--------------|
| 15 | 3.469503000  | 0.516857000  | 0.060386000  |
| 1  | 3.636534000  | 2.654908000  | -1.153314000 |
| 6  | -1.433127000 | 0.535500000  | -0.588641000 |
| 6  | 2.009294000  | -2.099444000 | 0.778672000  |
| 1  | -1.054405000 | 0.524739000  | -1.632631000 |
| 25 | 1.446666000  | -0.503198000 | 0.217586000  |
| 8  | 2.341471000  | -3.129549000 | 1.173973000  |
| 1  | -0.900760000 | 1.465421000  | 1.256435000  |
| 6  | -0.652677000 | 1.625065000  | 0.175812000  |
| 1  | 3.065076000  | 2.864836000  | 0.509563000  |
| 6  | 2.975189000  | 2.222028000  | -0.383389000 |
| 15 | -0.740504000 | -1.021483000 | 0.157138000  |
| 6  | 4.586132000  | 0.755612000  | 1.514220000  |
| 1  | 5.315224000  | 1.538888000  | 1.218068000  |
| 6  | 4.569920000  | 0.048537000  | -1.348864000 |
| 1  | 3.945458000  | 0.347505000  | -2.218390000 |
| 6  | 1.531726000  | 2.212515000  | -0.843811000 |
| 1  | 1.491896000  | 1.810508000  | -1.893005000 |
| 1  | 1.182012000  | 3.262482000  | -0.914750000 |
| 7  | 0.767301000  | 1.435052000  | 0.069255000  |
| 6  | 5.863822000  | 0.827133000  | -1.423960000 |
| 1  | 6.367730000  | 0.639147000  | -2.386307000 |

|   |              |              |              |
|---|--------------|--------------|--------------|
| 1 | 5.721762000  | 1.916610000  | -1.345150000 |
| 1 | 6.573088000  | 0.529408000  | -0.634316000 |
| 6 | 4.818865000  | -1.439394000 | -1.467057000 |
| 1 | 3.896361000  | -2.035166000 | -1.407338000 |
| 1 | 5.291395000  | -1.669420000 | -2.435893000 |
| 1 | 5.498231000  | -1.813719000 | -0.685683000 |
| 6 | 3.826184000  | 1.246609000  | 2.726691000  |
| 1 | 4.533831000  | 1.570385000  | 3.507366000  |
| 1 | 3.157890000  | 2.097785000  | 2.521518000  |
| 1 | 3.208082000  | 0.442981000  | 3.157565000  |
| 6 | 5.337197000  | -0.507552000 | 1.873090000  |
| 1 | 4.648813000  | -1.358336000 | 2.019481000  |
| 1 | 6.079991000  | -0.806860000 | 1.120271000  |
| 1 | 5.881993000  | -0.371009000 | 2.822086000  |
| 6 | -1.212633000 | -2.412856000 | -0.909323000 |
| 6 | -1.381362000 | -2.286222000 | -2.284393000 |
| 6 | -1.264757000 | -3.690277000 | -0.351142000 |
| 6 | -1.625872000 | -3.396707000 | -3.073403000 |
| 6 | -1.503379000 | -4.799092000 | -1.140743000 |
| 6 | -1.692722000 | -4.655222000 | -2.504667000 |
| 1 | -1.304020000 | -1.306484000 | -2.763497000 |
| 1 | -1.117010000 | -3.820288000 | 0.726792000  |
| 1 | -1.762159000 | -3.272375000 | -4.151536000 |
| 1 | -1.541535000 | -5.790869000 | -0.681119000 |
| 1 | -1.885699000 | -5.531988000 | -3.129290000 |
| 6 | -1.756578000 | -1.341514000 | 1.632345000  |
| 6 | -3.073286000 | -1.790835000 | 1.524321000  |
| 6 | -1.223554000 | -1.133814000 | 2.900448000  |
| 6 | -3.835986000 | -2.009391000 | 2.655418000  |
| 6 | -1.989732000 | -1.352291000 | 4.033638000  |
| 6 | -3.296593000 | -1.787435000 | 3.912272000  |
| 1 | -3.511807000 | -1.966075000 | 0.535519000  |
| 1 | -0.184857000 | -0.803396000 | 2.999618000  |
| 1 | -4.868376000 | -2.355941000 | 2.553308000  |
| 1 | -1.553888000 | -1.188072000 | 5.023425000  |
| 1 | -3.901747000 | -1.963747000 | 4.806542000  |
| 1 | 1.189855000  | 0.852476000  | 1.237414000  |
| 6 | -2.919636000 | 0.680831000  | -0.605845000 |
| 6 | -3.628469000 | 1.096551000  | 0.520898000  |
| 6 | -3.643228000 | 0.403243000  | -1.762680000 |
| 6 | -5.005418000 | 1.212441000  | 0.491714000  |
| 6 | -5.021675000 | 0.512769000  | -1.792367000 |
| 6 | -5.710387000 | 0.915564000  | -0.661976000 |
| 1 | -3.096348000 | 1.325810000  | 1.450296000  |
| 1 | -3.107461000 | 0.101991000  | -2.670010000 |
| 1 | -5.537024000 | 1.540514000  | 1.389859000  |
| 1 | -5.563551000 | 0.286532000  | -2.715545000 |
| 1 | -6.800145000 | 1.006746000  | -0.682262000 |

|   |              |              |              |
|---|--------------|--------------|--------------|
| 6 | -1.097863000 | 3.029313000  | -0.139641000 |
| 6 | -1.024148000 | 3.994343000  | 0.856664000  |
| 6 | -1.512188000 | 3.418547000  | -1.407274000 |
| 6 | -1.354809000 | 5.312606000  | 0.599823000  |
| 6 | -1.845308000 | 4.735539000  | -1.669275000 |
| 6 | -1.768274000 | 5.687153000  | -0.667051000 |
| 1 | -0.696872000 | 3.695338000  | 1.859760000  |
| 1 | -1.577768000 | 2.678239000  | -2.212522000 |
| 1 | -1.295208000 | 6.056122000  | 1.400432000  |
| 1 | -2.173561000 | 5.022755000  | -2.672673000 |
| 1 | -2.036844000 | 6.727144000  | -0.873866000 |
| 6 | 1.534032000  | -0.906375000 | -1.515836000 |
| 8 | 1.596290000  | -1.131094000 | -2.644775000 |
| 1 | 1.338806000  | 0.102739000  | 1.794767000  |

### 7Mn

$\Delta H^{353}$  -2388.407017 Hartrees,  $\Delta S^{353}$  273.4 eu,  $\Delta G^{353}$  -2388.56083 Hartrees

|    |              |              |              |
|----|--------------|--------------|--------------|
| 15 | 3.445365000  | 0.446977000  | 0.029945000  |
| 1  | 3.567823000  | 2.189760000  | -1.705861000 |
| 6  | -1.389365000 | 0.509253000  | -0.592417000 |
| 6  | 2.022097000  | -2.152657000 | 0.754011000  |
| 1  | -1.027722000 | 0.466242000  | -1.640116000 |
| 25 | 1.470042000  | -0.568103000 | 0.202141000  |
| 8  | 2.357834000  | -3.166753000 | 1.191840000  |
| 1  | -0.853716000 | 1.516493000  | 1.210077000  |
| 6  | -0.650235000 | 1.635453000  | 0.124445000  |
| 1  | 3.268794000  | 2.894035000  | -0.124905000 |
| 6  | 2.993663000  | 2.045059000  | -0.775598000 |
| 15 | -0.694971000 | -1.039850000 | 0.198923000  |
| 6  | 4.439336000  | 1.004635000  | 1.489870000  |
| 1  | 5.252438000  | 1.652866000  | 1.102128000  |
| 6  | 4.688346000  | -0.212875000 | -1.174571000 |
| 1  | 4.168826000  | -0.038262000 | -2.140585000 |
| 6  | 1.508074000  | 2.091373000  | -1.070354000 |
| 1  | 1.269255000  | 1.555760000  | -2.006767000 |
| 1  | 1.187898000  | 3.141733000  | -1.206916000 |
| 7  | 0.810292000  | 1.431345000  | 0.026123000  |
| 6  | 5.997179000  | 0.541153000  | -1.212311000 |
| 1  | 6.598548000  | 0.224909000  | -2.080785000 |
| 1  | 5.864490000  | 1.632893000  | -1.294448000 |
| 1  | 6.612538000  | 0.350234000  | -0.317201000 |
| 6  | 4.904871000  | -1.704911000 | -1.059630000 |
| 1  | 3.967253000  | -2.269799000 | -1.164674000 |
| 1  | 5.585445000  | -2.051902000 | -1.854903000 |
| 1  | 5.358177000  | -1.998689000 | -0.099468000 |
| 6  | 3.611620000  | 1.818064000  | 2.459490000  |
| 1  | 4.250848000  | 2.199738000  | 3.272898000  |
| 1  | 3.132408000  | 2.699374000  | 2.001462000  |



|   |              |              |              |
|---|--------------|--------------|--------------|
| 1 | 2.821009000  | 1.205544000  | 2.920648000  |
| 6 | 5.046860000  | -0.177829000 | 2.210432000  |
| 1 | 4.271140000  | -0.909821000 | 2.496409000  |
| 1 | 5.802288000  | -0.708612000 | 1.612119000  |
| 1 | 5.544567000  | 0.146706000  | 3.139511000  |
| 6 | -1.229879000 | -2.435502000 | -0.835796000 |
| 6 | -1.320547000 | -2.349226000 | -2.222076000 |
| 6 | -1.381804000 | -3.689164000 | -0.243547000 |
| 6 | -1.594981000 | -3.468619000 | -2.987544000 |
| 6 | -1.647650000 | -4.809017000 | -1.009357000 |
| 6 | -1.764766000 | -4.701539000 | -2.384250000 |
| 1 | -1.154389000 | -1.394528000 | -2.729918000 |
| 1 | -1.289402000 | -3.792622000 | 0.843017000  |
| 1 | -1.668748000 | -3.373475000 | -4.074795000 |
| 1 | -1.763016000 | -5.781133000 | -0.521259000 |
| 1 | -1.978641000 | -5.586422000 | -2.990401000 |
| 6 | -1.748445000 | -1.261681000 | 1.673159000  |
| 6 | -3.069985000 | -1.699369000 | 1.573099000  |
| 6 | -1.241814000 | -0.955383000 | 2.932145000  |
| 6 | -3.860327000 | -1.817482000 | 2.700315000  |
| 6 | -2.037141000 | -1.069348000 | 4.061027000  |
| 6 | -3.346416000 | -1.499178000 | 3.947175000  |
| 1 | -3.493338000 | -1.944867000 | 0.592535000  |
| 1 | -0.198242000 | -0.635545000 | 3.018472000  |
| 1 | -4.895161000 | -2.158590000 | 2.602493000  |
| 1 | -1.620862000 | -0.828815000 | 5.043939000  |
| 1 | -3.973335000 | -1.594416000 | 4.838958000  |
| 1 | 1.188492000  | 1.833435000  | 0.885013000  |
| 6 | -2.877495000 | 0.657245000  | -0.601867000 |
| 6 | -3.575968000 | 1.161625000  | 0.493524000  |
| 6 | -3.611869000 | 0.256709000  | -1.714482000 |
| 6 | -4.955145000 | 1.248953000  | 0.478132000  |
| 6 | -4.992531000 | 0.337179000  | -1.729785000 |
| 6 | -5.671359000 | 0.832770000  | -0.630688000 |
| 1 | -3.036520000 | 1.479580000  | 1.392498000  |
| 1 | -3.084614000 | -0.126709000 | -2.594777000 |
| 1 | -5.478938000 | 1.646628000  | 1.352211000  |
| 1 | -5.544128000 | 0.013427000  | -2.617290000 |
| 1 | -6.762832000 | 0.901814000  | -0.640654000 |
| 6 | -1.080941000 | 3.029171000  | -0.249594000 |
| 6 | -0.990253000 | 4.034587000  | 0.704843000  |
| 6 | -1.502417000 | 3.366008000  | -1.530394000 |
| 6 | -1.304341000 | 5.345010000  | 0.392612000  |
| 6 | -1.818653000 | 4.674630000  | -1.846517000 |
| 6 | -1.719396000 | 5.668118000  | -0.887394000 |
| 1 | -0.672440000 | 3.776557000  | 1.722974000  |
| 1 | -1.590026000 | 2.591057000  | -2.300027000 |
| 1 | -1.232459000 | 6.121255000  | 1.159964000  |

|   |              |              |              |
|---|--------------|--------------|--------------|
| 1 | -2.152258000 | 4.922018000  | -2.858369000 |
| 1 | -1.974886000 | 6.701504000  | -1.138265000 |
| 6 | 1.561152000  | -0.945993000 | -1.537580000 |
| 8 | 1.674492000  | -1.230122000 | -2.656410000 |
| 1 | 1.458966000  | -0.261437000 | 1.751048000  |

#### 4TS

$\Delta H^{353}$  -2388.353399 Hartrees,  $\Delta S^{353}$  273.2 eu,  $\Delta G^{353}$  -2388.507382 Hartrees, 570i cm<sup>-1</sup>

|    |              |              |              |
|----|--------------|--------------|--------------|
| 15 | 3.413881000  | 0.700488000  | 0.033178000  |
| 1  | 3.309615000  | 2.722106000  | -1.342898000 |
| 6  | -1.360149000 | 0.452154000  | -0.479396000 |
| 6  | 2.363320000  | -2.323021000 | 0.413207000  |
| 1  | -0.937545000 | 0.498369000  | -1.504863000 |
| 25 | 1.661844000  | -0.738448000 | 0.146657000  |
| 8  | 2.815799000  | -3.354011000 | 0.659685000  |
| 1  | -1.203044000 | 1.558953000  | 1.351659000  |
| 6  | -0.887400000 | 1.702546000  | 0.297409000  |
| 1  | 3.023360000  | 3.087553000  | 0.356502000  |
| 6  | 2.756112000  | 2.383492000  | -0.450098000 |
| 15 | -0.559820000 | -1.114144000 | 0.252717000  |
| 6  | 4.396132000  | 1.134517000  | 1.536270000  |
| 1  | 5.061688000  | 1.974280000  | 1.245325000  |
| 6  | 4.648762000  | 0.431752000  | -1.321756000 |
| 1  | 4.044354000  | 0.673622000  | -2.222482000 |
| 6  | 1.266835000  | 2.505976000  | -0.728770000 |
| 1  | 1.022964000  | 2.062959000  | -1.723625000 |
| 1  | 0.996305000  | 3.573916000  | -0.785907000 |
| 7  | 0.561221000  | 1.885354000  | 0.375864000  |
| 6  | 5.837683000  | 1.364592000  | -1.293045000 |
| 1  | 6.419755000  | 1.271490000  | -2.224731000 |
| 1  | 5.557450000  | 2.426116000  | -1.195599000 |
| 1  | 6.527680000  | 1.129297000  | -0.465972000 |
| 6  | 5.079471000  | -1.012031000 | -1.451917000 |
| 1  | 4.225359000  | -1.692280000 | -1.584391000 |
| 1  | 5.734856000  | -1.135283000 | -2.329888000 |
| 1  | 5.646217000  | -1.366314000 | -0.576432000 |
| 6  | 3.501815000  | 1.601820000  | 2.663525000  |
| 1  | 4.115740000  | 2.017404000  | 3.479716000  |
| 1  | 2.779302000  | 2.377868000  | 2.366201000  |
| 1  | 2.920314000  | 0.763735000  | 3.076492000  |
| 6  | 5.239223000  | -0.031429000 | 2.000716000  |
| 1  | 4.619405000  | -0.932706000 | 2.152559000  |
| 1  | 6.046835000  | -0.293131000 | 1.301020000  |
| 1  | 5.715428000  | 0.200030000  | 2.967906000  |
| 6  | -1.094907000 | -2.494823000 | -0.795014000 |
| 6  | -1.235700000 | -2.373858000 | -2.173956000 |
| 6  | -1.157524000 | -3.770071000 | -0.232981000 |
| 6  | -1.480022000 | -3.484634000 | -2.961337000 |

|   |              |              |              |
|---|--------------|--------------|--------------|
| 6 | -1.398146000 | -4.879315000 | -1.021843000 |
| 6 | -1.570516000 | -4.739984000 | -2.388137000 |
| 1 | -1.127317000 | -1.399736000 | -2.657555000 |
| 1 | -1.010480000 | -3.899469000 | 0.844692000  |
| 1 | -1.593250000 | -3.363796000 | -4.042495000 |
| 1 | -1.446209000 | -5.868974000 | -0.558714000 |
| 1 | -1.762212000 | -5.617655000 | -3.011715000 |
| 6 | -1.502053000 | -1.353904000 | 1.790157000  |
| 6 | -2.751994000 | -1.972228000 | 1.816290000  |
| 6 | -0.991718000 | -0.825679000 | 2.973342000  |
| 6 | -3.464333000 | -2.066848000 | 2.997206000  |
| 6 | -1.715314000 | -0.906155000 | 4.151034000  |
| 6 | -2.949692000 | -1.531104000 | 4.166115000  |
| 1 | -3.184572000 | -2.374007000 | 0.894262000  |
| 1 | -0.002919000 | -0.354350000 | 2.965805000  |
| 1 | -4.441484000 | -2.558495000 | 3.001136000  |
| 1 | -1.300127000 | -0.485741000 | 5.071580000  |
| 1 | -3.516407000 | -1.605617000 | 5.099068000  |
| 1 | 0.950787000  | 0.955185000  | 0.294491000  |
| 6 | -2.855739000 | 0.399564000  | -0.586386000 |
| 6 | -3.677835000 | 0.640651000  | 0.513990000  |
| 6 | -3.468525000 | 0.143134000  | -1.809799000 |
| 6 | -5.054570000 | 0.602257000  | 0.394818000  |
| 6 | -4.845207000 | 0.101475000  | -1.930855000 |
| 6 | -5.645702000 | 0.326144000  | -0.825353000 |
| 1 | -3.239568000 | 0.857097000  | 1.493849000  |
| 1 | -2.847336000 | -0.011302000 | -2.698672000 |
| 1 | -5.675010000 | 0.793777000  | 1.275154000  |
| 1 | -5.297240000 | -0.102203000 | -2.905884000 |
| 1 | -6.735098000 | 0.296101000  | -0.916971000 |
| 6 | -1.525248000 | 2.986724000  | -0.166533000 |
| 6 | -1.784517000 | 3.975350000  | 0.773623000  |
| 6 | -1.796392000 | 3.251276000  | -1.503647000 |
| 6 | -2.303996000 | 5.199557000  | 0.392966000  |
| 6 | -2.318149000 | 4.473400000  | -1.887181000 |
| 6 | -2.573132000 | 5.451063000  | -0.940739000 |
| 1 | -1.570878000 | 3.772909000  | 1.829293000  |
| 1 | -1.602875000 | 2.488976000  | -2.266330000 |
| 1 | -2.505839000 | 5.964490000  | 1.148265000  |
| 1 | -2.532519000 | 4.663639000  | -2.942761000 |
| 1 | -2.990093000 | 6.415031000  | -1.245848000 |
| 6 | 1.632579000  | -0.847996000 | -1.640160000 |
| 8 | 1.667661000  | -0.947242000 | -2.791754000 |
| 1 | 1.770642000  | -0.691449000 | 1.708797000  |

8Mn

$\Delta H^{353}$  -2388.417328 Hartrees,  $\Delta S^{353}$  273.7 eu,  $\Delta G^{353}$  -2388.571299 Hartrees

|   |             |             |             |
|---|-------------|-------------|-------------|
| 1 | 6.141582000 | 1.136371000 | 1.089035000 |
|---|-------------|-------------|-------------|

|    |              |              |              |
|----|--------------|--------------|--------------|
| 1  | 4.761809000  | 0.814186000  | -2.963331000 |
| 1  | -3.363038000 | -0.836999000 | -2.819342000 |
| 6  | -4.356364000 | -0.464173000 | -2.520187000 |
| 6  | 0.716013000  | 1.645032000  | -0.043122000 |
| 15 | 0.616081000  | -1.087798000 | 0.090425000  |
| 6  | -2.920512000 | 2.378732000  | 0.313574000  |
| 1  | -0.572382000 | -3.480978000 | 1.044781000  |
| 1  | 3.454509000  | -2.805612000 | 3.844592000  |
| 6  | 3.268571000  | 0.632869000  | -1.435552000 |
| 7  | -0.655122000 | 1.495743000  | 0.450303000  |
| 1  | 3.204739000  | -2.473350000 | -0.290084000 |
| 6  | 1.324781000  | -2.555124000 | -3.660337000 |
| 1  | -0.256297000 | -1.500555000 | -2.643632000 |
| 6  | 5.601664000  | 0.980513000  | -0.988794000 |
| 6  | -2.115363000 | -1.961227000 | -0.544469000 |
| 1  | 2.940689000  | -1.210593000 | 2.055857000  |
| 6  | -4.235879000 | 0.876798000  | -1.828845000 |
| 6  | 1.403535000  | -1.903605000 | -1.340681000 |
| 6  | 2.262894000  | -2.052403000 | 2.224177000  |
| 6  | 2.582487000  | -3.120510000 | -3.554440000 |
| 6  | -1.478180000 | 2.593844000  | -0.049225000 |
| 1  | 0.786003000  | -2.588544000 | -4.612040000 |
| 1  | 3.045923000  | -3.598291000 | -4.422970000 |
| 6  | 4.562540000  | 0.811339000  | -1.887850000 |
| 25 | -1.493299000 | -0.421378000 | 0.054326000  |
| 1  | -4.067544000 | 1.909076000  | -3.710010000 |
| 15 | -3.403147000 | 0.689204000  | -0.184793000 |
| 1  | -1.349681000 | 2.605948000  | -1.146791000 |
| 1  | 6.625102000  | 1.118328000  | -1.348993000 |
| 1  | -4.963097000 | -0.371411000 | -3.436430000 |
| 6  | 4.036338000  | 0.810694000  | 0.817554000  |
| 1  | -3.497580000 | 2.879328000  | -2.346180000 |
| 1  | 1.605066000  | 0.526528000  | 1.540443000  |
| 6  | -3.535676000 | 1.853632000  | -2.745267000 |
| 6  | 0.737453000  | -1.951041000 | -2.561145000 |
| 1  | -5.253192000 | 1.269876000  | -1.628684000 |
| 6  | 2.663216000  | -2.492190000 | -1.242164000 |
| 6  | 2.985081000  | 0.614556000  | -0.071757000 |
| 1  | 3.825541000  | 0.848663000  | 1.893411000  |
| 8  | -2.500386000 | -2.966488000 | -0.967134000 |
| 6  | 1.578982000  | 0.474803000  | 0.430554000  |
| 6  | 1.135709000  | -2.219927000 | 1.425952000  |
| 6  | 5.333153000  | 0.984593000  | 0.367925000  |
| 1  | 0.632551000  | 1.597189000  | -1.147891000 |
| 6  | 0.629035000  | -4.239730000 | 2.651121000  |
| 1  | 1.985171000  | -4.767583000 | 4.239139000  |
| 1  | -1.119960000 | 3.572078000  | 0.326030000  |
| 1  | -2.504500000 | 1.530314000  | -2.964429000 |

|   |              |              |              |
|---|--------------|--------------|--------------|
| 1 | -3.039509000 | 2.438889000  | 1.413219000  |
| 1 | -0.023853000 | -5.102049000 | 2.814210000  |
| 6 | 1.748102000  | -4.053651000 | 3.445150000  |
| 6 | 0.324127000  | -3.329483000 | 1.657038000  |
| 1 | -4.819695000 | -1.244280000 | -1.897747000 |
| 1 | 2.461549000  | 0.490696000  | -2.163081000 |
| 6 | 2.563471000  | -2.958538000 | 3.228120000  |
| 1 | 4.242936000  | -3.539386000 | -2.248013000 |
| 1 | -3.550384000 | 3.182225000  | -0.104994000 |
| 6 | 3.250071000  | -3.089756000 | -2.340965000 |
| 6 | -4.787513000 | 0.370306000  | 1.002282000  |
| 1 | -6.550542000 | 1.264961000  | 0.081519000  |
| 6 | -5.317003000 | -1.043302000 | 0.930793000  |
| 6 | -5.919131000 | 1.371965000  | 0.978828000  |
| 1 | -4.513729000 | -1.797226000 | 0.923589000  |
| 1 | -4.262510000 | 0.474582000  | 1.975448000  |
| 1 | -5.960643000 | -1.259177000 | 1.799314000  |
| 1 | -5.937196000 | -1.203764000 | 0.032965000  |
| 1 | -5.576180000 | 2.418184000  | 1.021299000  |
| 1 | -6.584200000 | 1.217852000  | 1.845136000  |
| 1 | -0.621788000 | 1.589244000  | 1.469603000  |
| 6 | 1.345066000  | 2.963611000  | 0.335382000  |
| 6 | 1.803402000  | 3.836424000  | -0.640296000 |
| 6 | 1.485717000  | 3.324727000  | 1.670807000  |
| 6 | 2.386618000  | 5.043200000  | -0.294506000 |
| 6 | 2.061540000  | 4.531920000  | 2.020801000  |
| 6 | 2.514752000  | 5.395186000  | 1.037029000  |
| 1 | 1.703566000  | 3.556820000  | -1.695579000 |
| 1 | 1.140238000  | 2.646757000  | 2.462131000  |
| 1 | 2.744965000  | 5.718206000  | -1.077033000 |
| 1 | 2.162678000  | 4.801082000  | 3.076298000  |
| 1 | 2.973811000  | 6.348774000  | 1.312479000  |
| 6 | -1.800006000 | -0.785302000 | 1.774493000  |
| 1 | -1.228357000 | 0.017590000  | -1.443740000 |
| 8 | -2.015913000 | -1.008450000 | 2.890119000  |

## Acetophenone

$\Delta H^{353}$  -384.668121 Hartrees,  $\Delta S^{353}$  93.4 eu,  $\Delta G^{353}$  -384.720678 Hartrees

|   |              |              |             |
|---|--------------|--------------|-------------|
| 6 | 0.000000000  | 0.213092000  | 0.000000000 |
| 6 | -1.045835000 | -0.707674000 | 0.000000000 |
| 6 | 1.313700000  | -0.252293000 | 0.000000000 |
| 6 | -0.782139000 | -2.066474000 | 0.000000000 |
| 6 | 1.577223000  | -1.607961000 | 0.000000000 |
| 6 | 0.528621000  | -2.517427000 | 0.000000000 |
| 1 | -2.086225000 | -0.364355000 | 0.000000000 |
| 1 | 2.123700000  | 0.484100000  | 0.000000000 |
| 1 | -1.609075000 | -2.783725000 | 0.000000000 |
| 1 | 2.611949000  | -1.965584000 | 0.000000000 |

|   |              |              |              |
|---|--------------|--------------|--------------|
| 1 | 0.736227000  | -3.592679000 | 0.000000000  |
| 6 | -0.218399000 | 1.688078000  | 0.000000000  |
| 6 | -1.628478000 | 2.197532000  | 0.000000000  |
| 1 | -1.617502000 | 3.294621000  | 0.000000000  |
| 1 | -2.184444000 | 1.844411000  | 0.883699000  |
| 1 | -2.184444000 | 1.844411000  | -0.883699000 |
| 8 | 0.717708000  | 2.444695000  | 0.000000000  |

TS<sup>S</sup>

$\Delta H^{353}$  -2773.061633 Hartrees,  $\Delta S^{353}$  314.4 eu,  $\Delta G^{353}$  -2773.238522 Hartrees, 995i cm<sup>-1</sup>

|    |              |              |              |
|----|--------------|--------------|--------------|
| 1  | -6.377771000 | 1.080086000  | -2.065885000 |
| 1  | -5.812846000 | 0.839959000  | 2.183923000  |
| 1  | 1.756121000  | -0.424442000 | 4.190312000  |
| 6  | 2.820816000  | -0.175053000 | 4.062313000  |
| 6  | -1.312822000 | 1.705419000  | 0.114896000  |
| 15 | -1.165569000 | -1.071948000 | 0.043117000  |
| 6  | 2.274147000  | 2.488094000  | 0.767371000  |
| 1  | 0.264613000  | -3.452849000 | -0.540007000 |
| 1  | -2.901793000 | -2.848078000 | -4.298225000 |
| 6  | -4.047939000 | 0.658530000  | 0.979176000  |
| 7  | 0.138039000  | 1.537090000  | 0.110228000  |
| 1  | -3.956652000 | -2.048809000 | -0.203953000 |
| 6  | -2.568612000 | -3.327543000 | 3.161767000  |
| 1  | -0.759810000 | -2.292186000 | 2.667818000  |
| 6  | -6.250486000 | 0.966564000  | 0.079504000  |
| 6  | 1.480651000  | -1.875435000 | 1.231420000  |
| 1  | -2.871512000 | -1.217873000 | -2.466223000 |
| 6  | 3.003772000  | 1.110064000  | 3.278989000  |
| 6  | -2.269774000 | -2.023760000 | 1.151655000  |
| 6  | -2.176673000 | -2.063284000 | -2.436142000 |
| 6  | -3.854915000 | -3.650833000 | 2.775105000  |
| 6  | 0.780084000  | 2.677562000  | 0.760400000  |
| 1  | -2.162182000 | -3.710215000 | 4.102239000  |
| 1  | -4.478108000 | -4.285495000 | 3.412071000  |
| 6  | -5.406564000 | 0.825463000  | 1.168509000  |
| 25 | 0.791300000  | -0.289286000 | 0.815570000  |
| 1  | 2.533604000  | 2.337609000  | 4.981320000  |
| 15 | 2.652610000  | 0.853349000  | 1.471927000  |
| 1  | 0.376081000  | 2.750066000  | 1.789321000  |
| 1  | -7.325879000 | 1.096652000  | 0.230324000  |
| 1  | 3.247035000  | -0.069012000 | 5.073951000  |
| 6  | -4.361401000 | 0.788927000  | -1.385774000 |
| 1  | 2.390944000  | 3.209120000  | 3.450468000  |
| 1  | -1.819723000 | 0.536474000  | -1.594824000 |
| 6  | 2.224661000  | 2.231465000  | 3.927727000  |
| 6  | -1.782571000 | -2.520523000 | 2.355679000  |
| 1  | 4.077657000  | 1.385004000  | 3.328794000  |
| 6  | -3.557344000 | -2.389959000 | 0.757450000  |

|   |              |              |              |
|---|--------------|--------------|--------------|
| 6 | -3.505540000 | 0.626738000  | -0.303191000 |
| 1 | -3.943602000 | 0.811551000  | -2.399311000 |
| 8 | 1.943399000  | -2.902286000 | 1.486465000  |
| 6 | -2.026681000 | 0.492870000  | -0.505024000 |
| 6 | -1.285043000 | -2.207627000 | -1.380006000 |
| 6 | -5.723103000 | 0.951263000  | -1.199160000 |
| 1 | -1.614301000 | 1.778147000  | 1.180447000  |
| 6 | -0.470232000 | -4.239924000 | -2.395285000 |
| 1 | -1.361821000 | -4.794321000 | -4.275869000 |
| 1 | 0.518555000  | 3.625251000  | 0.251238000  |
| 1 | 1.140972000  | 2.037049000  | 3.939337000  |
| 1 | 2.625794000  | 2.463746000  | -0.280970000 |
| 1 | 0.204851000  | -5.100273000 | -2.370186000 |
| 6 | -1.343919000 | -4.070451000 | -3.456279000 |
| 6 | -0.440168000 | -3.314978000 | -1.368037000 |
| 1 | 3.301716000  | -1.048266000 | 3.596522000  |
| 1 | -3.393925000 | 0.529111000  | 1.850273000  |
| 6 | -2.199553000 | -2.983710000 | -3.470368000 |
| 1 | -5.356352000 | -3.449274000 | 1.243620000  |
| 1 | 2.780620000  | 3.333401000  | 1.262063000  |
| 6 | -4.345816000 | -3.183343000 | 1.566656000  |
| 6 | 4.341013000  | 0.492570000  | 0.821596000  |
| 1 | 5.499539000  | 2.045513000  | 1.850970000  |
| 6 | 4.979474000  | -0.717389000 | 1.463875000  |
| 6 | 5.283270000  | 1.674547000  | 0.834045000  |
| 1 | 4.327254000  | -1.605219000 | 1.445230000  |
| 1 | 4.149620000  | 0.234493000  | -0.228902000 |
| 1 | 5.899586000  | -0.984480000 | 0.917481000  |
| 1 | 5.275568000  | -0.533391000 | 2.511362000  |
| 1 | 4.912669000  | 2.524553000  | 0.240647000  |
| 1 | 6.251676000  | 1.380517000  | 0.393823000  |
| 1 | 0.481368000  | 1.549832000  | -0.865503000 |
| 6 | -1.779101000 | 2.959601000  | -0.586156000 |
| 6 | -2.684154000 | 3.817087000  | 0.022244000  |
| 6 | -1.340752000 | 3.246618000  | -1.875317000 |
| 6 | -3.148972000 | 4.939795000  | -0.640524000 |
| 6 | -1.798241000 | 4.373569000  | -2.533849000 |
| 6 | -2.705939000 | 5.221042000  | -1.920527000 |
| 1 | -3.038330000 | 3.591625000  | 1.035011000  |
| 1 | -0.609294000 | 2.591504000  | -2.367605000 |
| 1 | -3.865355000 | 5.604381000  | -0.148783000 |
| 1 | -1.438335000 | 4.593736000  | -3.543297000 |
| 1 | -3.068088000 | 6.109899000  | -2.445154000 |
| 6 | -0.007179000 | 0.033560000  | 2.366489000  |
| 1 | 1.437045000  | -0.391300000 | -0.809488000 |
| 6 | 1.803702000  | 0.234403000  | -2.275353000 |
| 6 | 3.226236000  | -0.263543000 | -2.321044000 |
| 6 | 3.577735000  | -1.579518000 | -2.043106000 |

|   |              |              |              |
|---|--------------|--------------|--------------|
| 6 | 4.218949000  | 0.642452000  | -2.670607000 |
| 6 | 4.901607000  | -1.973619000 | -2.081063000 |
| 1 | 2.800558000  | -2.293337000 | -1.741160000 |
| 6 | 5.545391000  | 0.246951000  | -2.717617000 |
| 1 | 3.926387000  | 1.675472000  | -2.882974000 |
| 6 | 5.890788000  | -1.058988000 | -2.414423000 |
| 1 | 5.171048000  | -3.005561000 | -1.836051000 |
| 1 | 6.321752000  | 0.969382000  | -2.989064000 |
| 1 | 6.939168000  | -1.371121000 | -2.439041000 |
| 6 | 0.861792000  | -0.566793000 | -3.137141000 |
| 8 | 1.614353000  | 1.463517000  | -2.214622000 |
| 1 | 0.918829000  | -1.655521000 | -3.009068000 |
| 1 | 1.131655000  | -0.337511000 | -4.183556000 |
| 1 | -0.174899000 | -0.233706000 | -2.991572000 |
| 8 | -0.596461000 | 0.302060000  | 3.325200000  |

TS<sup>R</sup>

$\Delta H^{353}$  -2773.053028 Hartrees,  $\Delta S^{353}$  313.3 eu,  $\Delta G^{353}$  -2773.229255 Hartrees, 1061i cm<sup>-1</sup>

|    |              |              |              |
|----|--------------|--------------|--------------|
| 1  | -5.917990000 | 1.856801000  | -1.207354000 |
| 1  | -4.352533000 | 3.297918000  | 2.521860000  |
| 1  | 3.584141000  | 0.771476000  | 3.339302000  |
| 6  | 4.527302000  | 0.559651000  | 2.813779000  |
| 6  | -0.427401000 | 1.918010000  | -0.284285000 |
| 15 | -0.793783000 | -0.586090000 | 0.820775000  |
| 6  | 3.218565000  | 1.700944000  | -1.080765000 |
| 1  | -0.283062000 | -3.281508000 | 1.474505000  |
| 1  | -4.469464000 | -3.326001000 | -1.164946000 |
| 6  | -3.011824000 | 2.141315000  | 1.312161000  |
| 7  | 0.869253000  | 1.331921000  | -0.611202000 |
| 1  | -3.589131000 | -0.558061000 | 1.808721000  |
| 6  | -1.281390000 | -0.781265000 | 4.890663000  |
| 1  | 0.356634000  | -0.732182000 | 3.514811000  |
| 6  | -5.278897000 | 2.631374000  | 0.696424000  |
| 6  | 1.936338000  | -1.688416000 | 1.494761000  |
| 1  | -3.232307000 | -1.226055000 | -0.893755000 |
| 6  | 4.593749000  | 1.282582000  | 1.481975000  |
| 6  | -1.538330000 | -0.558454000 | 2.498613000  |
| 6  | -2.841237000 | -2.136308000 | -0.431153000 |
| 6  | -2.652932000 | -0.759229000 | 5.053922000  |
| 6  | 1.897765000  | 2.356332000  | -0.759918000 |
| 1  | -0.623577000 | -0.882264000 | 5.758547000  |
| 1  | -3.089878000 | -0.832874000 | 6.054118000  |
| 6  | -4.226347000 | 2.739863000  | 1.589566000  |
| 25 | 1.425843000  | -0.228133000 | 0.613279000  |
| 1  | 5.018174000  | 3.168309000  | 2.419958000  |
| 15 | 3.552687000  | 0.440579000  | 0.190876000  |
| 1  | 1.946009000  | 2.934033000  | 0.183567000  |
| 1  | -6.239984000 | 3.104092000  | 0.917752000  |



|   |              |              |              |
|---|--------------|--------------|--------------|
| 1 | 5.342350000  | 0.901341000  | 3.473311000  |
| 6 | -3.882596000 | 1.337871000  | -0.760732000 |
| 1 | 4.422136000  | 3.352186000  | 0.767272000  |
| 1 | -1.559150000 | 0.362225000  | -1.212672000 |
| 6 | 4.308933000  | 2.754015000  | 1.683816000  |
| 6 | -0.729971000 | -0.683058000 | 3.623570000  |
| 1 | 5.633331000  | 1.203700000  | 1.100793000  |
| 6 | -2.922605000 | -0.588952000 | 2.676930000  |
| 6 | -2.825258000 | 1.415540000  | 0.138102000  |
| 1 | -3.735129000 | 0.814896000  | -1.713614000 |
| 8 | 2.282102000  | -2.636823000 | 2.055123000  |
| 6 | -1.494019000 | 0.812716000  | -0.197047000 |
| 6 | -1.667495000 | -2.103262000 | 0.309362000  |
| 6 | -5.101156000 | 1.932013000  | -0.483712000 |
| 1 | -0.325389000 | 2.392708000  | 0.714238000  |
| 6 | -1.906922000 | -4.467856000 | 0.731685000  |
| 1 | -3.652765000 | -5.415340000 | -0.102254000 |
| 1 | 1.632777000  | 3.077104000  | -1.556870000 |
| 1 | 3.301039000  | 2.933629000  | 2.088432000  |
| 1 | 3.109316000  | 1.174071000  | -2.046559000 |
| 1 | -1.529524000 | -5.384878000 | 1.193661000  |
| 6 | -3.088125000 | -4.484909000 | 0.008430000  |
| 6 | -1.204119000 | -3.288334000 | 0.879928000  |
| 1 | 4.611378000  | -0.533635000 | 2.733152000  |
| 1 | -2.194901000 | 2.226117000  | 2.037850000  |
| 6 | -3.545708000 | -3.320080000 | -0.578165000 |
| 1 | -4.560706000 | -0.679891000 | 4.056007000  |
| 1 | 4.016927000  | 2.450552000  | -1.211577000 |
| 6 | -3.473015000 | -0.670415000 | 3.940672000  |
| 6 | 4.800444000  | -0.695965000 | -0.570212000 |
| 1 | 6.504071000  | -0.728161000 | -1.892815000 |
| 6 | 5.501639000  | -1.575045000 | 0.441538000  |
| 6 | 5.802321000  | 0.004139000  | -1.459274000 |
| 1 | 4.801314000  | -2.126464000 | 1.088140000  |
| 1 | 4.187568000  | -1.367149000 | -1.191721000 |
| 1 | 6.111107000  | -2.327730000 | -0.084971000 |
| 1 | 6.193050000  | -1.011138000 | 1.089805000  |
| 1 | 6.415806000  | 0.736812000  | -0.906698000 |
| 1 | 5.334682000  | 0.536440000  | -2.301856000 |
| 1 | 0.790365000  | 0.885847000  | -1.543195000 |
| 6 | -0.873854000 | 2.987630000  | -1.253267000 |
| 6 | -1.237717000 | 4.245121000  | -0.794678000 |
| 6 | -0.951833000 | 2.720257000  | -2.616520000 |
| 6 | -1.678973000 | 5.219058000  | -1.673617000 |
| 6 | -1.384926000 | 3.695700000  | -3.496082000 |
| 6 | -1.753469000 | 4.946041000  | -3.027566000 |
| 1 | -1.180670000 | 4.460742000  | 0.278804000  |
| 1 | -0.644326000 | 1.738311000  | -2.998347000 |

|   |              |              |              |
|---|--------------|--------------|--------------|
| 1 | -1.966329000 | 6.204402000  | -1.295217000 |
| 1 | -1.434014000 | 3.476341000  | -4.566898000 |
| 1 | -2.098848000 | 5.714508000  | -3.725178000 |
| 6 | 1.349704000  | 0.864661000  | 2.004867000  |
| 1 | 1.429263000  | -1.096745000 | -0.964324000 |
| 6 | 0.065006000  | -2.052682000 | -2.745553000 |
| 6 | 0.106524000  | -3.376601000 | -2.323068000 |
| 6 | -1.020093000 | -1.624584000 | -3.501456000 |
| 6 | -0.898330000 | -4.256689000 | -2.673753000 |
| 6 | -2.028712000 | -2.505148000 | -3.852692000 |
| 6 | -1.963164000 | -3.826764000 | -3.450393000 |
| 1 | 0.935462000  | -3.720146000 | -1.693329000 |
| 1 | -1.030040000 | -0.586994000 | -3.850927000 |
| 1 | -0.858107000 | -5.294553000 | -2.328876000 |
| 1 | -2.868354000 | -2.158476000 | -4.463756000 |
| 1 | -2.754826000 | -4.528709000 | -3.730142000 |
| 6 | 1.233477000  | -1.109440000 | -2.616360000 |
| 6 | 2.541036000  | -1.762186000 | -3.006842000 |
| 1 | 3.349714000  | -1.018715000 | -3.006413000 |
| 1 | 2.428727000  | -2.112285000 | -4.048524000 |
| 1 | 2.827444000  | -2.631637000 | -2.398628000 |
| 8 | 1.064952000  | 0.071892000  | -2.974721000 |
| 8 | 1.257884000  | 1.646740000  | 2.851668000  |

### MnNH-S-alkoxide

$\Delta H^{353}$  -2773.07802 Hartrees,  $\Delta S^{353}$  317.4 eu,  $\Delta G^{353}$  -2773.256584 Hartrees

|    |              |              |              |
|----|--------------|--------------|--------------|
| 1  | 5.979038000  | 1.635289000  | 2.450671000  |
| 1  | 6.041926000  | 0.733790000  | -1.746535000 |
| 1  | -1.873753000 | -1.260175000 | -4.171438000 |
| 6  | -2.947568000 | -1.040735000 | -4.056904000 |
| 6  | 1.215070000  | 1.576762000  | -0.472501000 |
| 15 | 1.221860000  | -1.120419000 | 0.052143000  |
| 6  | -2.392214000 | 2.103220000  | -1.209221000 |
| 1  | -0.570539000 | -3.138475000 | 1.042617000  |
| 1  | 2.654743000  | -2.236924000 | 4.689815000  |
| 6  | 4.129701000  | 0.626410000  | -0.781016000 |
| 7  | -0.225959000 | 1.337849000  | -0.454823000 |
| 1  | 3.989661000  | -1.945181000 | 0.739930000  |
| 6  | 3.063729000  | -3.599076000 | -2.623768000 |
| 1  | 1.171269000  | -2.613315000 | -2.446783000 |
| 6  | 6.166924000  | 1.193670000  | 0.352552000  |
| 6  | -1.265669000 | -2.257606000 | -1.314799000 |
| 1  | 2.831952000  | -0.992884000 | 2.579533000  |
| 6  | -3.174548000 | 0.335685000  | -3.465767000 |
| 6  | 2.471868000  | -2.144628000 | -0.790538000 |
| 6  | 2.040419000  | -1.740999000 | 2.694114000  |
| 6  | 4.302236000  | -3.826972000 | -2.055248000 |
| 6  | -0.906735000 | 2.349162000  | -1.254477000 |

|    |              |              |              |
|----|--------------|--------------|--------------|
| 1  | 2.792539000  | -4.079206000 | -3.568002000 |
| 1  | 5.021934000  | -4.484910000 | -2.550790000 |
| 6  | 5.494351000  | 0.843778000  | -0.806055000 |
| 25 | -0.734120000 | -0.575894000 | -0.979890000 |
| 1  | -2.831023000 | 1.318629000  | -5.347268000 |
| 15 | -2.710261000 | 0.375949000  | -1.672871000 |
| 1  | -0.517042000 | 2.319149000  | -2.294128000 |
| 1  | 7.247056000  | 1.363905000  | 0.331403000  |
| 1  | -3.393994000 | -1.101323000 | -5.063076000 |
| 6  | 4.094266000  | 1.126935000  | 1.554962000  |
| 1  | -2.685164000 | 2.414290000  | -3.967019000 |
| 1  | 1.562941000  | 0.760510000  | 1.464286000  |
| 6  | -2.482565000 | 1.386823000  | -4.303419000 |
| 6  | 2.154832000  | -2.764954000 | -1.994420000 |
| 1  | -4.263367000 | 0.545287000  | -3.494705000 |
| 6  | 3.716651000  | -2.403228000 | -0.216158000 |
| 6  | 3.409822000  | 0.752595000  | 0.404323000  |
| 1  | 3.532186000  | 1.274782000  | 2.485119000  |
| 8  | -1.595611000 | -3.331616000 | -1.565614000 |
| 6  | 1.925284000  | 0.559969000  | 0.433878000  |
| 6  | 1.140122000  | -1.975188000 | 1.658996000  |
| 6  | 5.461471000  | 1.339377000  | 1.533550000  |
| 1  | 1.568975000  | 1.420357000  | -1.516522000 |
| 6  | 0.055957000  | -3.639235000 | 3.030855000  |
| 1  | 0.874350000  | -3.938191000 | 4.999109000  |
| 1  | -0.692874000 | 3.366546000  | -0.873884000 |
| 1  | -1.390235000 | 1.247482000  | -4.328129000 |
| 1  | -2.714563000 | 2.204000000  | -0.154796000 |
| 1  | -0.731417000 | -4.388002000 | 3.156265000  |
| 6  | 0.951327000  | -3.389228000 | 4.056420000  |
| 6  | 0.148722000  | -2.935675000 | 1.843551000  |
| 1  | -3.382098000 | -1.855269000 | -3.458470000 |
| 1  | 3.614706000  | 0.334993000  | -1.704277000 |
| 6  | 1.943481000  | -2.440198000 | 3.884220000  |
| 1  | 5.598365000  | -3.414927000 | -0.384838000 |
| 1  | -2.951188000 | 2.849918000  | -1.796093000 |
| 6  | 4.624716000  | -3.230116000 | -0.847087000 |
| 6  | -4.290618000 | -0.007950000 | -0.803901000 |
| 1  | -5.695057000 | 1.161601000  | -2.011767000 |
| 6  | -4.835740000 | -1.378341000 | -1.130077000 |
| 6  | -5.353206000 | 1.055256000  | -0.967947000 |
| 1  | -4.084784000 | -2.177164000 | -1.019599000 |
| 1  | -3.990869000 | -0.016066000 | 0.258396000  |
| 1  | -5.665630000 | -1.619914000 | -0.445481000 |
| 1  | -5.241797000 | -1.434605000 | -2.154949000 |
| 1  | -5.025612000 | 2.046005000  | -0.617718000 |
| 1  | -6.240043000 | 0.786111000  | -0.370038000 |
| 1  | -0.619930000 | 1.514086000  | 0.580561000  |

|   |              |              |              |
|---|--------------|--------------|--------------|
| 6 | 1.634358000  | 2.975968000  | -0.081196000 |
| 6 | 2.444309000  | 3.715900000  | -0.930823000 |
| 6 | 1.259968000  | 3.523440000  | 1.142819000  |
| 6 | 2.880439000  | 4.979908000  | -0.573541000 |
| 6 | 1.690611000  | 4.790629000  | 1.494083000  |
| 6 | 2.503318000  | 5.520729000  | 0.642377000  |
| 1 | 2.745295000  | 3.284369000  | -1.893292000 |
| 1 | 0.593349000  | 2.960212000  | 1.808732000  |
| 1 | 3.521140000  | 5.548375000  | -1.254240000 |
| 1 | 1.383244000  | 5.217694000  | 2.453783000  |
| 1 | 2.842722000  | 6.520696000  | 0.928641000  |
| 6 | 0.035720000  | -0.402648000 | -2.556806000 |
| 1 | -1.274429000 | -0.304768000 | 1.529573000  |
| 6 | -1.547323000 | 0.534443000  | 2.287500000  |
| 6 | -3.036600000 | 0.311870000  | 2.514816000  |
| 6 | -3.567978000 | -0.963157000 | 2.677144000  |
| 6 | -3.898682000 | 1.398624000  | 2.526719000  |
| 6 | -4.930963000 | -1.152728000 | 2.818853000  |
| 1 | -2.893007000 | -1.831094000 | 2.663168000  |
| 6 | -5.264254000 | 1.215000000  | 2.676818000  |
| 1 | -3.464389000 | 2.394395000  | 2.389847000  |
| 6 | -5.786573000 | -0.060518000 | 2.813910000  |
| 1 | -5.335609000 | -2.164310000 | 2.928931000  |
| 1 | -5.935620000 | 2.080799000  | 2.676118000  |
| 1 | -6.865845000 | -0.207158000 | 2.920485000  |
| 6 | -0.791482000 | 0.200659000  | 3.569934000  |
| 8 | -1.247321000 | 1.734243000  | 1.822288000  |
| 1 | -0.940057000 | -0.832704000 | 3.929354000  |
| 1 | -1.123314000 | 0.889932000  | 4.365062000  |
| 1 | 0.289156000  | 0.364930000  | 3.428312000  |
| 8 | 0.577397000  | -0.240616000 | -3.560957000 |

### Mn(S-alkoxide)

$\Delta H^{353}$  -2773.100996 Hartrees,  $\Delta S^{353}$  317.7 eu,  $\Delta G^{353}$  -2773.279745 Hartrees

|    |              |              |              |
|----|--------------|--------------|--------------|
| 1  | 6.222769000  | 1.658241000  | -1.226543000 |
| 1  | 5.580642000  | -2.538974000 | -0.588042000 |
| 1  | -2.240242000 | -4.324155000 | 0.545808000  |
| 6  | -3.295566000 | -4.157515000 | 0.276694000  |
| 6  | 1.109973000  | -0.452582000 | -1.686608000 |
| 15 | 0.983534000  | -0.166348000 | 1.083575000  |
| 6  | -2.528448000 | -0.893517000 | -2.358378000 |
| 1  | -0.677176000 | 0.769736000  | 3.185526000  |
| 1  | 2.459977000  | 4.472505000  | 2.207451000  |
| 6  | 3.835642000  | -1.293112000 | -0.542767000 |
| 7  | -0.331256000 | -0.405637000 | -1.479810000 |
| 1  | 3.687200000  | 0.432317000  | 2.144100000  |
| 6  | 2.651026000  | -3.049275000 | 3.452579000  |
| 1  | 0.822628000  | -2.772080000 | 2.369150000  |

|    |              |              |              |
|----|--------------|--------------|--------------|
| 6  | 6.056336000  | -0.463919000 | -0.910180000 |
| 6  | -1.578503000 | -1.559064000 | 2.008959000  |
| 1  | 2.618035000  | 2.384675000  | 0.933165000  |
| 6  | -3.420056000 | -3.357360000 | -1.004616000 |
| 6  | 2.155522000  | -1.094685000 | 2.127011000  |
| 6  | 1.845034000  | 2.478710000  | 1.703074000  |
| 6  | 3.876750000  | -2.514056000 | 3.800302000  |
| 6  | -1.048371000 | -0.986587000 | -2.604830000 |
| 1  | 2.347541000  | -4.028207000 | 3.834107000  |
| 1  | 4.553537000  | -3.070650000 | 4.455146000  |
| 6  | 5.192142000  | -1.520444000 | -0.675947000 |
| 25 | -0.990988000 | -1.063726000 | 0.395666000  |
| 1  | -3.034142000 | -5.078965000 | -2.237320000 |
| 15 | -2.919974000 | -1.594702000 | -0.722084000 |
| 1  | -0.718168000 | -2.039264000 | -2.699969000 |
| 1  | 7.130272000  | -0.644162000 | -1.011286000 |
| 1  | -3.755297000 | -5.152110000 | 0.152838000  |
| 6  | 4.191673000  | 1.042940000  | -0.895120000 |
| 1  | -2.782971000 | -3.554096000 | -3.095877000 |
| 1  | 1.659938000  | 1.323043000  | -0.661741000 |
| 6  | -2.665065000 | -4.046577000 | -2.118573000 |
| 6  | 1.795981000  | -2.343278000 | 2.622359000  |
| 1  | -4.491276000 | -3.331163000 | -1.291810000 |
| 6  | 3.385537000  | -0.557074000 | 2.504973000  |
| 6  | 3.315755000  | -0.004750000 | -0.638417000 |
| 1  | 3.792643000  | 2.056920000  | -1.018070000 |
| 8  | -1.931891000 | -1.934263000 | 3.039358000  |
| 6  | 1.841463000  | 0.236628000  | -0.529378000 |
| 6  | 0.966429000  | 1.428749000  | 1.958865000  |
| 6  | 5.551269000  | 0.818856000  | -1.023894000 |
| 1  | 1.388170000  | -1.527013000 | -1.700218000 |
| 6  | -0.057281000 | 2.758981000  | 3.689907000  |
| 1  | 0.735393000  | 4.739394000  | 3.973165000  |
| 1  | -0.785017000 | -0.489847000 | -3.558030000 |
| 1  | -1.587183000 | -4.124294000 | -1.902529000 |
| 1  | -2.813559000 | 0.175055000  | -2.311721000 |
| 1  | -0.823329000 | 2.864445000  | 4.463336000  |
| 6  | 0.807279000  | 3.802396000  | 3.413506000  |
| 6  | 0.026910000  | 1.579942000  | 2.972722000  |
| 1  | -3.778276000 | -3.681895000 | 1.143341000  |
| 1  | 3.164717000  | -2.136357000 | -0.336764000 |
| 6  | 1.764293000  | 3.656476000  | 2.424223000  |
| 1  | 5.204404000  | -0.828415000 | 3.606757000  |
| 1  | -3.100208000 | -1.331834000 | -3.192865000 |
| 6  | 4.240567000  | -1.263240000 | 3.327364000  |
| 6  | -4.518884000 | -0.762424000 | -0.330425000 |
| 1  | -5.812384000 | -1.720853000 | -1.817377000 |
| 6  | -5.180627000 | -1.337711000 | 0.900881000  |

|   |              |              |              |
|---|--------------|--------------|--------------|
| 6 | -5.496371000 | -0.717543000 | -1.484078000 |
| 1 | -4.488043000 | -1.455373000 | 1.748866000  |
| 1 | -4.211741000 | 0.273007000  | -0.091490000 |
| 1 | -5.992140000 | -0.674117000 | 1.240707000  |
| 1 | -5.636517000 | -2.322915000 | 0.698823000  |
| 1 | -5.108798000 | -0.180899000 | -2.362788000 |
| 1 | -6.414205000 | -0.190874000 | -1.173139000 |
| 1 | -0.642168000 | 0.567682000  | -1.363071000 |
| 6 | 1.566515000  | 0.159763000  | -2.989395000 |
| 6 | 2.420131000  | -0.532161000 | -3.835227000 |
| 6 | 1.175998000  | 1.447997000  | -3.339521000 |
| 6 | 2.878364000  | 0.047014000  | -5.006027000 |
| 6 | 1.624285000  | 2.025741000  | -4.512734000 |
| 6 | 2.479842000  | 1.326489000  | -5.348356000 |
| 1 | 2.739698000  | -1.544019000 | -3.559980000 |
| 1 | 0.496653000  | 2.014694000  | -2.687286000 |
| 1 | 3.554924000  | -0.510752000 | -5.659796000 |
| 1 | 1.302220000  | 3.036608000  | -4.779004000 |
| 1 | 2.837555000  | 1.784587000  | -6.274736000 |
| 6 | -0.240950000 | -2.641724000 | 0.097415000  |
| 6 | -2.374577000 | 1.652848000  | 0.948819000  |
| 6 | -2.320693000 | 3.037078000  | 0.401843000  |
| 6 | -3.401691000 | 3.913639000  | 0.467218000  |
| 6 | -1.155137000 | 3.484847000  | -0.216738000 |
| 6 | -3.313793000 | 5.192744000  | -0.050144000 |
| 1 | -4.340886000 | 3.569786000  | 0.912822000  |
| 6 | -1.060672000 | 4.767089000  | -0.725467000 |
| 1 | -0.295983000 | 2.806697000  | -0.262877000 |
| 6 | -2.141700000 | 5.628610000  | -0.646140000 |
| 1 | -4.180314000 | 5.859583000  | 0.002216000  |
| 1 | -0.126504000 | 5.102209000  | -1.188206000 |
| 1 | -2.073832000 | 6.640759000  | -1.055878000 |
| 6 | -3.154234000 | 1.395995000  | 2.023863000  |
| 8 | -1.625483000 | 0.823585000  | 0.304410000  |
| 1 | -3.689523000 | 2.196049000  | 2.534390000  |
| 1 | -3.200979000 | 0.400397000  | 2.467226000  |
| 8 | 0.286055000  | -3.643863000 | -0.139217000 |

$T_{\text{NH-O}}$

$\Delta H^{353}$  -2773.076955 Hartrees,  $\Delta S^{353}$  315.0 eu,  $\Delta G^{353}$  -2773.254181 Hartrees, 1735i cm<sup>-1</sup>

|    |              |              |              |
|----|--------------|--------------|--------------|
| 1  | -6.018131000 | 1.479054000  | -2.498203000 |
| 1  | -6.038034000 | 0.827061000  | 1.745434000  |
| 1  | 1.848375000  | -1.001562000 | 4.247889000  |
| 6  | 2.920762000  | -0.778238000 | 4.129268000  |
| 6  | -1.222919000 | 1.604524000  | 0.381678000  |
| 15 | -1.225614000 | -1.111806000 | 0.007487000  |
| 6  | 2.368282000  | 2.192530000  | 1.100109000  |
| 1  | 0.554463000  | -3.194213000 | -0.874825000 |

|    |              |              |              |
|----|--------------|--------------|--------------|
| 1  | -2.662250000 | -2.459248000 | -4.567094000 |
| 6  | -4.134812000 | 0.669677000  | 0.769513000  |
| 7  | 0.211093000  | 1.356420000  | 0.391571000  |
| 1  | -3.990816000 | -1.980535000 | -0.633281000 |
| 6  | -3.046796000 | -3.477974000 | 2.797764000  |
| 1  | -1.158381000 | -2.493861000 | 2.569672000  |
| 6  | -6.185275000 | 1.162434000  | -0.375757000 |
| 6  | 1.276410000  | -2.160381000 | 1.408908000  |
| 1  | -2.827456000 | -1.102454000 | -2.526977000 |
| 6  | 3.138682000  | 0.564917000  | 3.463116000  |
| 6  | -2.467298000 | -2.103843000 | 0.899889000  |
| 6  | -2.041045000 | -1.860795000 | -2.601926000 |
| 6  | -4.287085000 | -3.734435000 | 2.245378000  |
| 6  | 0.880077000  | 2.426869000  | 1.111793000  |
| 1  | -2.770182000 | -3.915240000 | 3.761043000  |
| 1  | -5.002675000 | -4.371660000 | 2.772887000  |
| 6  | -5.500106000 | 0.883487000  | 0.794706000  |
| 25 | 0.720337000  | -0.499437000 | 1.013688000  |
| 1  | 2.768184000  | 1.651548000  | 5.281761000  |
| 15 | 2.688661000  | 0.497729000  | 1.667474000  |
| 1  | 0.489983000  | 2.484090000  | 2.153754000  |
| 1  | -7.265800000 | 1.330190000  | -0.354217000 |
| 1  | 3.359935000  | -0.777565000 | 5.140533000  |
| 6  | -4.123485000 | 1.031021000  | -1.591576000 |
| 1  | 2.621147000  | 2.663147000  | 3.838392000  |
| 1  | -1.588575000 | 0.682331000  | -1.503461000 |
| 6  | 2.427731000  | 1.654683000  | 4.233020000  |
| 6  | -2.143229000 | -2.669198000 | 2.128705000  |
| 1  | 4.224936000  | 0.788143000  | 3.489783000  |
| 6  | -3.713232000 | -2.392412000 | 0.342490000  |
| 6  | -3.425839000 | 0.728485000  | -0.427666000 |
| 1  | -3.571648000 | 1.126709000  | -2.534645000 |
| 8  | 1.622324000  | -3.219986000 | 1.700049000  |
| 6  | -1.941010000 | 0.539268000  | -0.459882000 |
| 6  | -1.143560000 | -2.047464000 | -1.554528000 |
| 6  | -5.491307000 | 1.239511000  | -1.569965000 |
| 1  | -1.596174000 | 1.523077000  | 1.430915000  |
| 6  | -0.075130000 | -3.793013000 | -2.834906000 |
| 1  | -0.898052000 | -4.191588000 | -4.783839000 |
| 1  | 0.666907000  | 3.414578000  | 0.656948000  |
| 1  | 1.336977000  | 1.504202000  | 4.256622000  |
| 1  | 2.710953000  | 2.235112000  | 0.048299000  |
| 1  | 0.704533000  | -4.555538000 | -2.919524000 |
| 6  | -0.968584000 | -3.590908000 | -3.872760000 |
| 6  | -0.161301000 | -3.025833000 | -1.686866000 |
| 1  | 3.368100000  | -1.620593000 | 3.580738000  |
| 1  | -3.610630000 | 0.434130000  | 1.703217000  |
| 6  | -1.951431000 | -2.624514000 | -3.752417000 |

|   |              |              |              |
|---|--------------|--------------|--------------|
| 1 | -5.591082000 | -3.401244000 | 0.563452000  |
| 1 | 2.915109000  | 2.974219000  | 1.652179000  |
| 6 | -4.616340000 | -3.192997000 | 1.013287000  |
| 6 | 4.281001000  | 0.073130000  | 0.837150000  |
| 1 | 5.659694000  | 1.341643000  | 1.973021000  |
| 6 | 4.840243000  | -1.265114000 | 1.258859000  |
| 6 | 5.330976000  | 1.156949000  | 0.936011000  |
| 1 | 4.101136000  | -2.079789000 | 1.195618000  |
| 1 | 3.990353000  | -0.009541000 | -0.224614000 |
| 1 | 5.680367000  | -1.540464000 | 0.599807000  |
| 1 | 5.236570000  | -1.246822000 | 2.288847000  |
| 1 | 4.998212000  | 2.116581000  | 0.512069000  |
| 1 | 6.227531000  | 0.854742000  | 0.369010000  |
| 1 | 0.698292000  | 1.492570000  | -0.831897000 |
| 6 | -1.635030000 | 2.977299000  | -0.104929000 |
| 6 | -2.420201000 | 3.790701000  | 0.699393000  |
| 6 | -1.271281000 | 3.432590000  | -1.369089000 |
| 6 | -2.839054000 | 5.034655000  | 0.259877000  |
| 6 | -1.684945000 | 4.678659000  | -1.804980000 |
| 6 | -2.471195000 | 5.482363000  | -0.995991000 |
| 1 | -2.713962000 | 3.434690000  | 1.694385000  |
| 1 | -0.627102000 | 2.815080000  | -2.007279000 |
| 1 | -3.459689000 | 5.661257000  | 0.907580000  |
| 1 | -1.384634000 | 5.029803000  | -2.797174000 |
| 1 | -2.797453000 | 6.466028000  | -1.346765000 |
| 6 | -0.056308000 | -0.265780000 | 2.577666000  |
| 1 | 1.285776000  | -0.408716000 | -1.546486000 |
| 6 | 1.585074000  | 0.348628000  | -2.355467000 |
| 6 | 3.074990000  | 0.118637000  | -2.529964000 |
| 6 | 3.603550000  | -1.167021000 | -2.577514000 |
| 6 | 3.941049000  | 1.199363000  | -2.610838000 |
| 6 | 4.968163000  | -1.370838000 | -2.675567000 |
| 1 | 2.924606000  | -2.028861000 | -2.508273000 |
| 6 | 5.308379000  | 0.999594000  | -2.717865000 |
| 1 | 3.513802000  | 2.205893000  | -2.562285000 |
| 6 | 5.827647000  | -0.284038000 | -2.741908000 |
| 1 | 5.370103000  | -2.389103000 | -2.694939000 |
| 1 | 5.982916000  | 1.860860000  | -2.772171000 |
| 1 | 6.908053000  | -0.441544000 | -2.814987000 |
| 6 | 0.851059000  | -0.052647000 | -3.625311000 |
| 8 | 1.281741000  | 1.601049000  | -1.988539000 |
| 1 | 1.004536000  | -1.105950000 | -3.915650000 |
| 1 | 1.198309000  | 0.584298000  | -4.456151000 |
| 1 | -0.230814000 | 0.120547000  | -3.509606000 |
| 8 | -0.606037000 | -0.053380000 | 3.568169000  |

1-phenylethanol

$\Delta H^{353}$  -385.846516 Hartrees,  $\Delta S^{353}$  95.7 eu,  $\Delta G^{353}$  -385.900375 Hartrees



|   |              |              |              |
|---|--------------|--------------|--------------|
| 1 | -1.891030000 | 1.153959000  | -1.530796000 |
| 1 | -1.847004000 | -1.106908000 | -1.019854000 |
| 6 | -0.154115000 | -0.126027000 | -0.169658000 |
| 6 | 0.690802000  | -1.212954000 | -0.360493000 |
| 6 | 0.398743000  | 1.102208000  | 0.175397000  |
| 6 | 2.060470000  | -1.080475000 | -0.205903000 |
| 6 | 1.769406000  | 1.238684000  | 0.325699000  |
| 6 | 2.603868000  | 0.148232000  | 0.137259000  |
| 1 | 0.262146000  | -2.183759000 | -0.642352000 |
| 1 | -0.265740000 | 1.961018000  | 0.324286000  |
| 1 | 2.714451000  | -1.944773000 | -0.364201000 |
| 1 | 2.194026000  | 2.211973000  | 0.594960000  |
| 1 | 3.687211000  | 0.257083000  | 0.253341000  |
| 6 | -1.650926000 | -0.282158000 | -0.291620000 |
| 6 | -2.274336000 | -0.659725000 | 1.027668000  |
| 1 | -1.854501000 | -1.601688000 | 1.411353000  |
| 1 | -2.087482000 | 0.128333000  | 1.775830000  |
| 8 | -2.276470000 | 0.892312000  | -0.694109000 |
| 1 | -3.363783000 | -0.780440000 | 0.920210000  |
| 1 | -1.891030000 | 1.153959000  | -1.530796000 |
| 1 | -1.847004000 | -1.106908000 | -1.019854000 |
| 6 | -0.154115000 | -0.126027000 | -0.169658000 |
| 6 | 0.690802000  | -1.212954000 | -0.360493000 |
| 6 | 0.398743000  | 1.102208000  | 0.175397000  |
| 6 | 2.060470000  | -1.080475000 | -0.205903000 |
| 6 | 1.769406000  | 1.238684000  | 0.325699000  |
| 6 | 2.603868000  | 0.148232000  | 0.137259000  |
| 1 | 0.262146000  | -2.183759000 | -0.642352000 |
| 1 | -0.265740000 | 1.961018000  | 0.324286000  |
| 1 | 2.714451000  | -1.944773000 | -0.364201000 |
| 1 | 2.194026000  | 2.211973000  | 0.594960000  |
| 1 | 3.687211000  | 0.257083000  | 0.253341000  |
| 6 | -1.650926000 | -0.282158000 | -0.291620000 |
| 6 | -2.274336000 | -0.659725000 | 1.027668000  |
| 1 | -1.854501000 | -1.601688000 | 1.411353000  |
| 1 | -2.087482000 | 0.128333000  | 1.775830000  |
| 8 | -2.276470000 | 0.892312000  | -0.694109000 |
| 1 | -3.363783000 | -0.780440000 | 0.920210000  |

### 3,5-bis(trifluoromethyl)acetophenone

$\Delta H^{353}$  -1058.486733 Hartrees,  $\Delta S^{353}$  136.3 eu,  $\Delta G^{353}$  -1058.563417 Hartrees

|   |              |              |              |
|---|--------------|--------------|--------------|
| 6 | -0.189468000 | 1.626696000  | 0.001861000  |
| 6 | -1.290749000 | 0.779057000  | -0.017972000 |
| 6 | 1.090214000  | 1.081949000  | 0.021068000  |
| 6 | -1.109750000 | -0.594016000 | -0.020614000 |
| 6 | 1.262534000  | -0.288298000 | 0.021049000  |
| 6 | 0.164488000  | -1.134824000 | -0.001105000 |
| 1 | -2.308041000 | 1.182793000  | -0.035201000 |

|   |              |              |              |
|---|--------------|--------------|--------------|
| 1 | 1.946559000  | 1.763210000  | 0.038622000  |
| 1 | 0.303598000  | -2.220815000 | -0.002730000 |
| 6 | -0.308475000 | 3.118963000  | 0.003206000  |
| 6 | -1.678351000 | 3.718596000  | -0.021769000 |
| 1 | -1.596761000 | 4.812310000  | -0.020603000 |
| 1 | -2.270061000 | 3.401689000  | 0.852429000  |
| 1 | -2.239412000 | 3.400917000  | -0.915640000 |
| 8 | 0.683356000  | 3.796709000  | 0.024002000  |
| 6 | -2.293498000 | -1.513526000 | -0.000178000 |
| 9 | -3.388556000 | -0.909071000 | -0.414750000 |
| 9 | -2.102596000 | -2.567083000 | -0.769260000 |
| 9 | -2.538037000 | -1.968585000 | 1.215023000  |
| 6 | 2.639149000  | -0.882656000 | 0.000004000  |
| 9 | 3.547658000  | -0.030200000 | 0.422764000  |
| 9 | 2.712377000  | -1.957575000 | 0.761391000  |
| 9 | 2.989233000  | -1.254756000 | -1.217634000 |

### TS<sup>S</sup> 3,5-CF3

$\Delta H^{353}$  -3446.865899 Hartrees,  $\Delta S^{353}$  351.9 eu,  $\Delta G^{353}$  -3447.063794 Hartrees, 909i cm<sup>-1</sup>

|    |              |              |              |
|----|--------------|--------------|--------------|
| 1  | -6.789825000 | 0.875981000  | -3.112523000 |
| 1  | -7.085082000 | 0.511907000  | 1.155436000  |
| 1  | 0.100609000  | -0.344791000 | 4.622669000  |
| 6  | 1.155230000  | -0.034453000 | 4.676804000  |
| 6  | -2.315620000 | 1.692690000  | 0.071694000  |
| 15 | -1.981900000 | -1.063779000 | -0.047023000 |
| 6  | 1.052995000  | 2.653288000  | 1.359825000  |
| 1  | -0.318622000 | -3.333599000 | -0.388006000 |
| 1  | -2.753242000 | -2.816609000 | -4.668327000 |
| 6  | -5.104734000 | 0.470833000  | 0.333181000  |
| 7  | -0.877545000 | 1.610846000  | 0.318180000  |
| 1  | -4.611451000 | -2.176862000 | -0.838273000 |
| 6  | -3.812176000 | -3.490106000 | 2.700545000  |
| 1  | -2.003246000 | -2.350219000 | 2.581730000  |
| 6  | -7.093773000 | 0.690260000  | -0.990107000 |
| 6  | 0.458333000  | -1.754558000 | 1.589846000  |
| 1  | -3.176634000 | -1.240369000 | -2.834677000 |
| 6  | 1.390298000  | 1.272410000  | 3.945089000  |
| 6  | -3.215256000 | -2.107910000 | 0.813476000  |
| 6  | -2.444625000 | -2.041456000 | -2.689755000 |
| 6  | -4.982752000 | -3.865846000 | 2.070251000  |
| 6  | -0.425345000 | 2.765164000  | 1.091904000  |
| 1  | -3.568775000 | -3.882095000 | 3.692044000  |
| 1  | -5.677791000 | -4.551681000 | 2.563504000  |
| 6  | -6.481185000 | 0.556347000  | 0.244648000  |
| 25 | -0.245831000 | -0.198987000 | 1.087811000  |
| 1  | 0.543446000  | 2.438016000  | 5.540992000  |
| 15 | 1.390070000  | 1.026286000  | 2.103384000  |
| 1  | -1.008862000 | 2.788291000  | 2.032893000  |

|   |              |              |              |
|---|--------------|--------------|--------------|
| 1 | -8.183197000 | 0.755748000  | -1.059625000 |
| 1 | 1.399184000  | 0.078409000  | 5.746216000  |
| 6 | -4.939339000 | 0.671028000  | -2.041627000 |
| 1 | 0.617677000  | 3.324835000  | 4.014237000  |
| 1 | -2.401685000 | 0.566420000  | -1.737412000 |
| 6 | 0.434932000  | 2.330283000  | 4.448738000  |
| 6 | -2.935005000 | -2.618391000 | 2.076252000  |
| 1 | 2.417645000  | 1.616385000  | 4.185994000  |
| 6 | -4.382393000 | -2.527440000 | 0.173901000  |
| 6 | -4.312468000 | 0.514456000  | -0.811274000 |
| 1 | -4.327145000 | 0.754805000  | -2.947623000 |
| 8 | 0.934037000  | -2.756881000 | 1.907935000  |
| 6 | -2.817585000 | 0.468914000  | -0.712173000 |
| 6 | -1.758659000 | -2.160159000 | -1.487044000 |
| 6 | -6.317864000 | 0.751433000  | -2.133701000 |
| 1 | -2.802873000 | 1.694406000  | 1.068806000  |
| 6 | -0.636451000 | -4.109957000 | -2.362092000 |
| 1 | -1.120607000 | -4.664115000 | -4.386060000 |
| 1 | -0.645206000 | 3.711578000  | 0.561572000  |
| 1 | -0.617959000 | 2.065299000  | 4.265371000  |
| 1 | 1.582890000  | 2.673916000  | 0.389229000  |
| 1 | 0.075756000  | -4.928236000 | -2.222350000 |
| 6 | -1.304152000 | -3.963649000 | -3.566547000 |
| 6 | -0.860590000 | -3.213949000 | -1.333088000 |
| 1 | 1.756920000  | -0.871540000 | 4.293077000  |
| 1 | -4.635264000 | 0.346031000  | 1.316251000  |
| 6 | -2.211714000 | -2.931551000 | -3.724673000 |
| 1 | -6.177933000 | -3.692261000 | 0.285866000  |
| 1 | 1.418497000  | 3.513568000  | 1.944863000  |
| 6 | -5.263149000 | -3.385756000 | 0.801102000  |
| 6 | 3.188798000  | 0.761550000  | 1.776900000  |
| 1 | 4.045371000  | 2.396160000  | 2.957948000  |
| 6 | 3.773522000  | -0.400095000 | 2.547773000  |
| 6 | 4.043105000  | 1.999699000  | 1.927871000  |
| 1 | 3.194223000  | -1.329687000 | 2.428400000  |
| 1 | 3.199167000  | 0.475285000  | 0.717281000  |
| 1 | 4.793363000  | -0.610229000 | 2.184066000  |
| 1 | 3.862072000  | -0.189830000 | 3.627392000  |
| 1 | 3.739548000  | 2.817742000  | 1.256600000  |
| 1 | 5.093281000  | 1.762582000  | 1.681888000  |
| 1 | -0.379270000 | 1.674744000  | -0.584162000 |
| 6 | -2.736637000 | 2.950449000  | -0.650955000 |
| 6 | -3.775715000 | 3.730922000  | -0.165804000 |
| 6 | -2.114244000 | 3.320760000  | -1.839010000 |
| 6 | -4.193192000 | 4.857878000  | -0.852322000 |
| 6 | -2.524805000 | 4.452348000  | -2.520003000 |
| 6 | -3.567525000 | 5.221597000  | -2.031156000 |
| 1 | -4.274199000 | 3.440196000  | 0.766338000  |

|   |              |              |              |
|---|--------------|--------------|--------------|
| 1 | -1.276754000 | 2.728411000  | -2.231191000 |
| 1 | -5.016912000 | 5.460624000  | -0.458930000 |
| 1 | -2.020544000 | 4.738349000  | -3.447841000 |
| 1 | -3.892574000 | 6.114006000  | -2.573646000 |
| 6 | -1.317699000 | 0.012567000  | 2.485712000  |
| 1 | 0.669967000  | -0.215988000 | -0.411664000 |
| 6 | 1.248699000  | 0.492085000  | -1.807163000 |
| 6 | 2.685830000  | 0.102958000  | -1.564292000 |
| 6 | 3.077480000  | -1.198241000 | -1.276087000 |
| 6 | 3.642569000  | 1.102698000  | -1.618522000 |
| 6 | 4.402551000  | -1.480437000 | -1.012302000 |
| 1 | 2.324560000  | -1.991276000 | -1.203744000 |
| 6 | 4.970943000  | 0.812324000  | -1.349744000 |
| 1 | 3.317003000  | 2.124972000  | -1.832845000 |
| 6 | 5.359512000  | -0.475846000 | -1.037423000 |
| 1 | 6.404535000  | -0.701414000 | -0.808168000 |
| 6 | 0.554020000  | -0.356082000 | -2.837321000 |
| 8 | 0.964067000  | 1.699095000  | -1.759783000 |
| 1 | 0.654137000  | -1.440562000 | -2.702316000 |
| 1 | 1.007075000  | -0.094457000 | -3.810172000 |
| 1 | -0.510027000 | -0.092555000 | -2.896010000 |
| 8 | -2.070527000 | 0.198756000  | 3.343309000  |
| 6 | 4.825143000  | -2.858470000 | -0.617021000 |
| 9 | 5.930148000  | -3.224981000 | -1.239268000 |
| 9 | 5.080814000  | -2.935070000 | 0.677620000  |
| 9 | 3.902350000  | -3.757135000 | -0.885525000 |
| 6 | 5.993374000  | 1.901452000  | -1.396569000 |
| 9 | 5.479144000  | 3.068974000  | -1.063608000 |
| 9 | 6.996789000  | 1.662062000  | -0.573085000 |
| 9 | 6.513876000  | 2.042911000  | -2.601818000 |

### TS<sup>R</sup> 3,5-CF3

$\Delta H^{353}$  -3446.865925 Hartrees,  $\Delta S^{353}$  350.8 eu,  $\Delta G^{353}$  -3447.057644 Hartrees, 953i cm<sup>-1</sup>

|    |              |              |              |
|----|--------------|--------------|--------------|
| 1  | -2.726978000 | 5.527743000  | -0.334449000 |
| 1  | 0.785791000  | 5.935974000  | 2.100548000  |
| 1  | 5.070232000  | -1.243307000 | 1.986563000  |
| 6  | 5.366803000  | -2.112177000 | 1.380181000  |
| 6  | 1.439048000  | 1.872618000  | -0.769277000 |
| 15 | 0.184043000  | 0.485489000  | 1.263895000  |
| 6  | 3.462002000  | -0.905280000 | -2.240721000 |
| 1  | -0.818089000 | -1.745831000 | 2.691250000  |
| 1  | -4.781513000 | 0.947212000  | 1.442036000  |
| 6  | 0.494028000  | 4.027521000  | 1.166509000  |
| 7  | 1.834520000  | 0.515639000  | -1.139051000 |
| 1  | -1.264206000 | 2.581625000  | 2.787479000  |
| 6  | 1.483721000  | 1.167471000  | 5.094740000  |
| 1  | 2.028400000  | -0.105244000 | 3.463704000  |
| 6  | -1.017863000 | 5.875360000  | 0.927171000  |

|    |              |              |              |
|----|--------------|--------------|--------------|
| 6  | 1.697244000  | -2.103517000 | 1.660913000  |
| 1  | -2.574421000 | 1.577934000  | 0.590726000  |
| 6  | 5.263871000  | -1.815008000 | -0.103861000 |
| 6  | 0.415379000  | 1.223989000  | 2.928293000  |
| 6  | -2.659653000 | 0.701261000  | 1.237980000  |
| 6  | 0.641863000  | 2.163138000  | 5.551010000  |
| 6  | 3.077032000  | 0.513942000  | -1.905038000 |
| 1  | 2.240240000  | 0.737205000  | 5.757036000  |
| 1  | 0.733217000  | 2.535059000  | 6.575716000  |
| 6  | 0.142743000  | 5.333177000  | 1.452764000  |
| 25 | 1.826339000  | -0.824593000 | 0.428062000  |
| 1  | 7.059222000  | -0.636018000 | -0.084276000 |
| 15 | 3.501095000  | -1.868369000 | -0.694860000 |
| 1  | 3.853782000  | 1.014138000  | -1.294922000 |
| 1  | -1.295342000 | 6.908308000  | 1.155493000  |
| 1  | 6.410521000  | -2.345254000 | 1.648910000  |
| 6  | -1.460359000 | 3.800328000  | -0.187706000 |
| 1  | 6.053507000  | -0.316043000 | -1.500796000 |
| 1  | -0.652470000 | 1.441669000  | -0.738018000 |
| 6  | 6.014384000  | -0.542056000 | -0.424677000 |
| 6  | 1.370071000  | 0.702006000  | 3.795046000  |
| 1  | 5.770615000  | -2.636305000 | -0.652052000 |
| 6  | -0.460134000 | 2.193196000  | 3.420847000  |
| 6  | -0.311170000 | 3.234828000  | 0.352512000  |
| 1  | -2.081572000 | 3.203921000  | -0.868058000 |
| 8  | 1.616111000  | -2.947652000 | 2.443751000  |
| 6  | 0.097244000  | 1.840211000  | -0.018372000 |
| 6  | -1.534870000 | -0.036867000 | 1.582555000  |
| 6  | -1.817334000 | 5.105305000  | 0.101741000  |
| 1  | 2.220920000  | 2.259030000  | -0.082253000 |
| 6  | -2.939136000 | -1.498940000 | 2.892464000  |
| 1  | -5.035715000 | -1.011208000 | 2.951653000  |
| 1  | 2.976181000  | 1.106511000  | -2.834019000 |
| 1  | 5.596070000  | 0.333459000  | 0.095337000  |
| 1  | 2.665591000  | -1.333321000 | -2.877023000 |
| 1  | -3.043278000 | -2.375454000 | 3.538069000  |
| 6  | -4.050424000 | -0.740070000 | 2.562366000  |
| 6  | -1.693771000 | -1.151127000 | 2.405810000  |
| 1  | 4.750051000  | -2.960244000 | 1.711063000  |
| 1  | 1.408725000  | 3.609681000  | 1.602478000  |
| 6  | -3.908268000 | 0.351263000  | 1.726072000  |
| 1  | -1.026069000 | 3.439154000  | 5.070108000  |
| 1  | 4.393055000  | -0.937541000 | -2.831136000 |
| 6  | -0.336607000 | 2.669742000  | 4.711010000  |
| 6  | 3.365344000  | -3.635237000 | -1.227886000 |
| 1  | 3.951798000  | -5.005557000 | -2.786244000 |
| 6  | 3.756149000  | -4.615133000 | -0.143927000 |
| 6  | 4.089615000  | -3.944595000 | -2.518017000 |

|   |              |              |              |
|---|--------------|--------------|--------------|
| 1 | 3.224637000  | -4.439568000 | 0.804211000  |
| 1 | 2.284559000  | -3.767559000 | -1.391652000 |
| 1 | 3.506829000  | -5.639570000 | -0.465471000 |
| 1 | 4.838944000  | -4.608194000 | 0.065106000  |
| 1 | 5.178336000  | -3.780933000 | -2.439905000 |
| 1 | 3.728860000  | -3.349584000 | -3.371131000 |
| 1 | 1.114987000  | 0.141171000  | -1.779884000 |
| 6 | 1.355593000  | 2.822621000  | -1.940387000 |
| 6 | 2.057275000  | 4.018970000  | -1.924649000 |
| 6 | 0.557634000  | 2.526707000  | -3.040787000 |
| 6 | 1.962569000  | 4.909700000  | -2.979717000 |
| 6 | 0.468532000  | 3.412285000  | -4.099328000 |
| 6 | 1.167466000  | 4.607683000  | -4.070476000 |
| 1 | 2.684770000  | 4.259937000  | -1.058465000 |
| 1 | 0.012942000  | 1.574978000  | -3.081764000 |
| 1 | 2.519258000  | 5.850776000  | -2.948893000 |
| 1 | -0.157180000 | 3.164564000  | -4.961888000 |
| 1 | 1.092674000  | 5.308422000  | -4.906941000 |
| 6 | 3.010419000  | 0.187631000  | 1.273529000  |
| 1 | 0.659446000  | -1.665883000 | -0.639291000 |
| 6 | -1.609156000 | -1.659859000 | -1.531635000 |
| 6 | -2.167734000 | -2.629837000 | -0.710454000 |
| 6 | -2.418556000 | -0.639534000 | -2.005113000 |
| 6 | -3.513176000 | -2.592330000 | -0.400337000 |
| 6 | -3.762989000 | -0.599634000 | -1.679414000 |
| 6 | -4.324447000 | -1.580587000 | -0.886402000 |
| 1 | -1.540424000 | -3.424400000 | -0.293694000 |
| 1 | -1.977096000 | 0.110402000  | -2.669560000 |
| 1 | -5.386618000 | -1.551723000 | -0.632023000 |
| 6 | -0.213160000 | -1.757436000 | -2.094242000 |
| 6 | 0.155143000  | -3.161742000 | -2.508331000 |
| 1 | 1.143435000  | -3.165496000 | -2.986567000 |
| 1 | -0.573635000 | -3.474552000 | -3.277293000 |
| 1 | 0.125770000  | -3.908814000 | -1.703480000 |
| 8 | 0.174925000  | -0.824931000 | -2.815693000 |
| 8 | 3.766606000  | 0.917138000  | 1.755273000  |
| 6 | -4.585408000 | 0.557998000  | -2.136976000 |
| 9 | -5.877035000 | 0.306028000  | -2.083613000 |
| 9 | -4.376384000 | 1.631403000  | -1.383590000 |
| 9 | -4.298047000 | 0.912358000  | -3.373290000 |
| 6 | -4.114442000 | -3.692281000 | 0.413721000  |
| 9 | -4.526414000 | -4.690126000 | -0.351548000 |
| 9 | -3.252354000 | -4.203865000 | 1.268972000  |
| 9 | -5.165563000 | -3.287287000 | 1.099320000  |

1-(3,5-bis(trifluoromethyl)phenyl)ethanol

$\Delta H^{353}$  -1059.667354 Hartrees,  $\Delta S^{353}$  137.8 eu,  $\Delta G^{353}$  -1059.744881 Hartrees

|   |             |             |              |
|---|-------------|-------------|--------------|
| 1 | 2.094089000 | 2.763172000 | -1.741026000 |
|---|-------------|-------------|--------------|

|   |              |              |              |
|---|--------------|--------------|--------------|
| 1 | 0.171134000  | 3.547602000  | -0.777900000 |
| 6 | 0.447743000  | 1.522561000  | -0.168597000 |
| 6 | -0.906537000 | 1.234337000  | -0.133126000 |
| 6 | 1.359621000  | 0.474264000  | -0.111344000 |
| 6 | -1.346741000 | -0.078224000 | -0.039185000 |
| 6 | 0.914862000  | -0.832390000 | -0.022382000 |
| 6 | -0.441702000 | -1.120794000 | 0.015536000  |
| 1 | -1.638228000 | 2.050679000  | -0.186386000 |
| 1 | 2.431100000  | 0.695754000  | -0.144943000 |
| 1 | -0.789993000 | -2.155554000 | 0.079156000  |
| 6 | 0.936829000  | 2.951301000  | -0.226889000 |
| 6 | 1.088318000  | 3.527836000  | 1.157189000  |
| 1 | 0.137432000  | 3.498737000  | 1.709752000  |
| 1 | 1.835111000  | 2.952966000  | 1.729111000  |
| 8 | 2.181015000  | 3.053790000  | -0.832649000 |
| 1 | 1.429005000  | 4.572864000  | 1.100352000  |
| 6 | -2.821184000 | -0.340691000 | -0.023505000 |
| 9 | -3.098470000 | -1.615700000 | 0.152432000  |
| 9 | -3.423014000 | 0.332036000  | 0.940746000  |
| 9 | -3.393847000 | 0.033905000  | -1.154005000 |
| 6 | 1.888253000  | -1.968451000 | 0.059551000  |
| 9 | 3.122108000  | -1.584340000 | -0.193999000 |
| 9 | 1.890301000  | -2.524552000 | 1.258075000  |
| 9 | 1.587973000  | -2.927464000 | -0.797740000 |

### 1,1,1-trifluoroacetophenone

$\Delta H^{353}$  -1058.486733 Hartrees,  $\Delta S^{353}$  136.3 eu,  $\Delta G^{353}$  -1058.563417 Hartrees

|   |              |              |              |
|---|--------------|--------------|--------------|
| 6 | -0.040365000 | 0.723345000  | 0.000000000  |
| 6 | -1.395044000 | 0.387027000  | 0.000000000  |
| 6 | 0.337277000  | 2.067466000  | 0.000000000  |
| 6 | -2.351402000 | 1.385827000  | 0.000000000  |
| 6 | -0.621317000 | 3.059026000  | 0.000000000  |
| 6 | -1.967444000 | 2.717892000  | 0.000000000  |
| 1 | -1.717474000 | -0.657840000 | 0.000000000  |
| 1 | 1.404605000  | 2.309777000  | 0.000000000  |
| 1 | -3.412898000 | 1.121272000  | 0.000000000  |
| 1 | -0.321557000 | 4.111293000  | 0.000000000  |
| 1 | -2.729449000 | 3.504195000  | 0.000000000  |
| 6 | 1.045564000  | -0.270957000 | 0.000000000  |
| 6 | 0.672336000  | -1.773506000 | 0.000000000  |
| 8 | 2.210000000  | 0.005574000  | 0.000000000  |
| 9 | 1.749523000  | -2.508938000 | 0.000000000  |
| 9 | -0.040365000 | -2.090532000 | 1.065056000  |
| 9 | -0.040365000 | -2.090532000 | -1.065056000 |

### TS<sup>S</sup> 1,1,1-F3

$\Delta H^{353}$  -682.283409 Hartrees,  $\Delta S^{353}$  326.4 eu,  $\Delta G^{353}$  -682.342952 Hartrees, 351i cm<sup>-1</sup>

|   |             |             |              |
|---|-------------|-------------|--------------|
| 1 | 6.408132000 | 0.416803000 | 2.293014000  |
| 1 | 5.931972000 | 1.487669000 | -1.837799000 |

|    |              |              |              |
|----|--------------|--------------|--------------|
| 1  | -2.828672000 | 1.587807000  | -5.203351000 |
| 6  | -2.473276000 | 1.174974000  | -4.244427000 |
| 6  | 1.384193000  | 1.718340000  | 0.312943000  |
| 15 | 1.242806000  | -0.951961000 | -0.453986000 |
| 6  | -2.167452000 | 2.717314000  | -0.269871000 |
| 1  | -0.057636000 | -3.425998000 | -0.806272000 |
| 1  | 2.734434000  | -3.984008000 | 3.242807000  |
| 6  | 4.140748000  | 0.969292000  | -0.778179000 |
| 7  | -0.069165000 | 1.569887000  | 0.217746000  |
| 1  | 4.009326000  | -1.994841000 | -0.397731000 |
| 6  | 2.788296000  | -2.172650000 | -4.052795000 |
| 1  | 0.954080000  | -1.319426000 | -3.352480000 |
| 6  | 6.325543000  | 0.964217000  | 0.213022000  |
| 6  | -1.336190000 | -1.329462000 | -1.961755000 |
| 1  | 2.724581000  | -1.832393000 | 2.066967000  |
| 6  | -2.710771000 | 2.170248000  | -3.125673000 |
| 6  | 2.390436000  | -1.537249000 | -1.757541000 |
| 6  | 2.104457000  | -2.648737000 | 1.684034000  |
| 6  | 4.056599000  | -2.611334000 | -3.725031000 |
| 6  | -0.680186000 | 2.863981000  | -0.086567000 |
| 1  | 2.427343000  | -2.247418000 | -5.082522000 |
| 1  | 4.711244000  | -3.028562000 | -4.495829000 |
| 6  | 5.503998000  | 1.170705000  | -0.882483000 |
| 25 | -0.681397000 | 0.049973000  | -1.050187000 |
| 1  | -2.116124000 | 3.836909000  | -4.348447000 |
| 15 | -2.489813000 | 1.376356000  | -1.459398000 |
| 1  | -0.199971000 | 3.244100000  | -1.009372000 |
| 1  | 7.404577000  | 1.121702000  | 0.128998000  |
| 1  | -2.986132000 | 0.212985000  | -4.095421000 |
| 6  | 4.404995000  | 0.371216000  | 1.519616000  |
| 1  | -2.099942000 | 4.215659000  | -2.622849000 |
| 1  | 1.872005000  | 0.089867000  | 1.600039000  |
| 6  | -1.889983000 | 3.419291000  | -3.352913000 |
| 6  | 1.962024000  | -1.640454000 | -3.076241000 |
| 1  | -3.778598000 | 2.468904000  | -3.162705000 |
| 6  | 3.659302000  | -2.020634000 | -1.435543000 |
| 6  | 3.571080000  | 0.555337000  | 0.423351000  |
| 1  | 3.966219000  | 0.088944000  | 2.484104000  |
| 8  | -1.780517000 | -2.229456000 | -2.532104000 |
| 6  | 2.088878000  | 0.373558000  | 0.552892000  |
| 6  | 1.318649000  | -2.470108000 | 0.553125000  |
| 6  | 5.771198000  | 0.566649000  | 1.416446000  |
| 1  | 1.711692000  | 2.110503000  | -0.671467000 |
| 6  | 0.579208000  | -4.758476000 | 0.748234000  |
| 1  | 1.359818000  | -5.876436000 | 2.415228000  |
| 1  | -0.463416000 | 3.602993000  | 0.708448000  |
| 1  | -0.807606000 | 3.219213000  | -3.338167000 |
| 1  | -2.614216000 | 2.399441000  | 0.689787000  |



|   |              |              |              |
|---|--------------|--------------|--------------|
| 1 | -0.025324000 | -5.588381000 | 0.370886000  |
| 6 | 1.351467000  | -4.919162000 | 1.886381000  |
| 6 | 0.563716000  | -3.544742000 | 0.089222000  |
| 1 | -1.402931000 | 0.952091000  | -4.370944000 |
| 1 | 3.506046000  | 1.115178000  | -1.660874000 |
| 6 | 2.115388000  | -3.863543000 | 2.348827000  |
| 1 | 5.483297000  | -2.901014000 | -2.136387000 |
| 1 | -2.626708000 | 3.685439000  | -0.530312000 |
| 6 | 4.488236000  | -2.538957000 | -2.410245000 |
| 6 | -4.225221000 | 0.884326000  | -1.067889000 |
| 1 | -5.308990000 | 2.685408000  | -1.695068000 |
| 6 | -4.810578000 | -0.077571000 | -2.076155000 |
| 6 | -5.166407000 | 2.039416000  | -0.811722000 |
| 1 | -4.159854000 | -0.946147000 | -2.266072000 |
| 1 | -4.115846000 | 0.332713000  | -0.124266000 |
| 1 | -5.770094000 | -0.470859000 | -1.700237000 |
| 1 | -5.025772000 | 0.405496000  | -3.045092000 |
| 1 | -4.842897000 | 2.681124000  | 0.022294000  |
| 1 | -6.164059000 | 1.651126000  | -0.543073000 |
| 1 | -0.437849000 | 1.293307000  | 1.137025000  |
| 6 | 1.819947000  | 2.704461000  | 1.370136000  |
| 6 | 2.712720000  | 3.720679000  | 1.062555000  |
| 6 | 1.360655000  | 2.585681000  | 2.678109000  |
| 6 | 3.143711000  | 4.602489000  | 2.038374000  |
| 6 | 1.783462000  | 3.472234000  | 3.651757000  |
| 6 | 2.678038000  | 4.481177000  | 3.335360000  |
| 1 | 3.084850000  | 3.813068000  | 0.035473000  |
| 1 | 0.648599000  | 1.793557000  | 2.944363000  |
| 1 | 3.850822000  | 5.396175000  | 1.780395000  |
| 1 | 1.407931000  | 3.372724000  | 4.674350000  |
| 1 | 3.013470000  | 5.179218000  | 4.107706000  |
| 6 | 0.209888000  | 0.811689000  | -2.383168000 |
| 1 | -1.440351000 | -0.541551000 | 0.380925000  |
| 6 | -2.090298000 | -0.267102000 | 2.060425000  |
| 6 | -3.477514000 | -0.768199000 | 1.831762000  |
| 6 | -3.775149000 | -1.933497000 | 1.132336000  |
| 6 | -4.511082000 | 0.011922000  | 2.337993000  |
| 6 | -5.091904000 | -2.300160000 | 0.932073000  |
| 1 | -2.967142000 | -2.528193000 | 0.695087000  |
| 6 | -5.828075000 | -0.360489000 | 2.138878000  |
| 1 | -4.257678000 | 0.927531000  | 2.880643000  |
| 6 | -6.120190000 | -1.513991000 | 1.430528000  |
| 1 | -5.322180000 | -3.205475000 | 0.363220000  |
| 1 | -6.636899000 | 0.258529000  | 2.538296000  |
| 1 | -7.161202000 | -1.805480000 | 1.262627000  |
| 6 | -1.153629000 | -1.259568000 | 2.763579000  |
| 8 | -1.876563000 | 0.905068000  | 2.352136000  |
| 8 | 0.850136000  | 1.344180000  | -3.186463000 |

|   |              |              |             |
|---|--------------|--------------|-------------|
| 9 | -1.118206000 | -2.474773000 | 2.278084000 |
| 9 | 0.074588000  | -0.786805000 | 2.810194000 |
| 9 | -1.570402000 | -1.359691000 | 4.017742000 |

TS<sup>R</sup> 1,1,1-F3

$\Delta H^{353}$  -3070.674752 Hartrees,  $\Delta S^{353}$  327.2 eu,  $\Delta G^{353}$  -3070.858813 Hartrees, 506i cm<sup>-1</sup>

|    |              |              |              |
|----|--------------|--------------|--------------|
| 1  | 6.335094000  | 0.118370000  | -1.991844000 |
| 1  | 5.691682000  | -1.932908000 | 1.724930000  |
| 1  | -1.887013000 | -1.963572000 | 3.922504000  |
| 6  | -2.940537000 | -2.173950000 | 3.680559000  |
| 6  | 1.270427000  | -1.765743000 | -0.642405000 |
| 15 | 0.995098000  | 0.667637000  | 0.667686000  |
| 6  | -2.254358000 | -3.005880000 | -0.453526000 |
| 1  | -0.121406000 | 3.059095000  | 1.655975000  |
| 1  | 2.803932000  | 4.428728000  | -2.095223000 |
| 6  | 3.937678000  | -1.229627000 | 0.710848000  |
| 7  | -0.191916000 | -1.674139000 | -0.603702000 |
| 1  | 3.731361000  | 1.726984000  | 1.026013000  |
| 6  | 2.317330000  | 1.019163000  | 4.543361000  |
| 1  | 0.542074000  | 0.341428000  | 3.559926000  |
| 6  | 6.168861000  | -0.917262000 | -0.112614000 |
| 6  | -1.635362000 | 0.642754000  | 2.116798000  |
| 1  | 2.469389000  | 2.047674000  | -1.630990000 |
| 6  | -3.073914000 | -2.964991000 | 2.394274000  |
| 6  | 2.054134000  | 0.940636000  | 2.143251000  |
| 6  | 1.964539000  | 2.783560000  | -1.000435000 |
| 6  | 3.592244000  | 1.531474000  | 4.401311000  |
| 6  | -0.757925000 | -3.023927000 | -0.611787000 |
| 1  | 1.899612000  | 0.846230000  | 5.539398000  |
| 1  | 4.196301000  | 1.758940000  | 5.284671000  |
| 6  | 5.300987000  | -1.408303000 | 0.848316000  |
| 25 | -0.927514000 | -0.490650000 | 0.946283000  |
| 1  | -2.519131000 | -4.794731000 | 3.380308000  |
| 15 | -2.704163000 | -1.892363000 | 0.921774000  |
| 1  | -0.289947000 | -3.566602000 | 0.233008000  |
| 1  | 7.248178000  | -1.055691000 | -0.002171000 |
| 1  | -3.355054000 | -2.748221000 | 4.525811000  |
| 6  | 4.294097000  | -0.086452000 | -1.355453000 |
| 1  | -2.428479000 | -4.912874000 | 1.620887000  |
| 1  | 1.736693000  | 0.114023000  | -1.520737000 |
| 6  | -2.254201000 | -4.233432000 | 2.468587000  |
| 6  | 1.555758000  | 0.726395000  | 3.423402000  |
| 1  | -4.136560000 | -3.263945000 | 2.292867000  |
| 6  | 3.327578000  | 1.498879000  | 2.018547000  |
| 6  | 3.412604000  | -0.554354000 | -0.388464000 |
| 1  | 3.895912000  | 0.407926000  | -2.249075000 |
| 8  | -2.103013000 | 1.399546000  | 2.852796000  |
| 6  | 1.932235000  | -0.386243000 | -0.553275000 |

|   |              |              |              |
|---|--------------|--------------|--------------|
| 6 | 1.157896000  | 2.380023000  | 0.054757000  |
| 6 | 5.660359000  | -0.258994000 | -1.217913000 |
| 1 | 1.555713000  | -2.353558000 | 0.253568000  |
| 6 | 0.711745000  | 4.699214000  | 0.554210000  |
| 1 | 1.693664000  | 6.153008000  | -0.696144000 |
| 1 | -0.473790000 | -3.573501000 | -1.529381000 |
| 1 | -1.173358000 | -4.033581000 | 2.529063000  |
| 1 | -2.723909000 | -2.602392000 | -1.365073000 |
| 1 | 0.199928000  | 5.448825000  | 1.164867000  |
| 6 | 1.537647000  | 5.090523000  | -0.486796000 |
| 6 | 0.525690000  | 3.357451000  | 0.821553000  |
| 1 | -3.463977000 | -1.205872000 | 3.656441000  |
| 1 | 3.265326000  | -1.599855000 | 1.494464000  |
| 6 | 2.155011000  | 4.130148000  | -1.266168000 |
| 1 | 5.093920000  | 2.200506000  | 3.008416000  |
| 1 | -2.635907000 | -4.034403000 | -0.349089000 |
| 6 | 4.093538000  | 1.776130000  | 3.132942000  |
| 6 | -4.390634000 | -1.333633000 | 0.418163000  |
| 1 | -4.925408000 | -3.099682000 | -0.771873000 |
| 6 | -5.037475000 | -0.432772000 | 1.444740000  |
| 6 | -5.335134000 | -2.442910000 | 0.010749000  |
| 1 | -4.377244000 | 0.384451000  | 1.776409000  |
| 1 | -4.180146000 | -0.724608000 | -0.476733000 |
| 1 | -5.946824000 | 0.030351000  | 1.028141000  |
| 1 | -5.353817000 | -0.992214000 | 2.341989000  |
| 1 | -6.266282000 | -2.011988000 | -0.393629000 |
| 1 | -5.633258000 | -3.081435000 | 0.858684000  |
| 1 | -0.491019000 | -1.189263000 | -1.456134000 |
| 6 | 1.786071000  | -2.497478000 | -1.858313000 |
| 6 | 2.627889000  | -3.591446000 | -1.723346000 |
| 6 | 1.437132000  | -2.069740000 | -3.135617000 |
| 6 | 3.115144000  | -4.250185000 | -2.838970000 |
| 6 | 1.916041000  | -2.733297000 | -4.250571000 |
| 6 | 2.757471000  | -3.824034000 | -4.105532000 |
| 1 | 2.913347000  | -3.926020000 | -0.719066000 |
| 1 | 0.776667000  | -1.201855000 | -3.264068000 |
| 1 | 3.781476000  | -5.108864000 | -2.715852000 |
| 1 | 1.629909000  | -2.391046000 | -5.249507000 |
| 1 | 3.137652000  | -4.345359000 | -4.988675000 |
| 6 | -0.080583000 | -1.523248000 | 2.120960000  |
| 1 | -1.672731000 | 0.367041000  | -0.291851000 |
| 6 | -1.793107000 | 2.605543000  | -1.505321000 |
| 6 | -2.754717000 | 2.907062000  | -0.547458000 |
| 6 | -1.187887000 | 3.635782000  | -2.214422000 |
| 6 | -3.095665000 | 4.221903000  | -0.298492000 |
| 6 | -1.545650000 | 4.949682000  | -1.976236000 |
| 6 | -2.497544000 | 5.245434000  | -1.016994000 |
| 1 | -3.218137000 | 2.098083000  | 0.027527000  |

|   |              |              |              |
|---|--------------|--------------|--------------|
| 1 | -0.430355000 | 3.385595000  | -2.963300000 |
| 1 | -3.839215000 | 4.453245000  | 0.469485000  |
| 1 | -1.063409000 | 5.754138000  | -2.539671000 |
| 1 | -2.774569000 | 6.285654000  | -0.821392000 |
| 6 | -1.437599000 | 1.218434000  | -1.930628000 |
| 6 | -2.593758000 | 0.485600000  | -2.634391000 |
| 8 | -0.335559000 | 0.901892000  | -2.345778000 |
| 8 | 0.507287000  | -2.217278000 | 2.836673000  |
| 9 | -2.644015000 | 0.943115000  | -3.873730000 |
| 9 | -3.790123000 | 0.665525000  | -2.119445000 |
| 9 | -2.372941000 | -0.813169000 | -2.719010000 |

## 2,2,2-trifluoro-1-phenylethanol

$\Delta H^{353}$  -683.474095 Hartrees,  $\Delta S^{353}$  108.6 eu,  $\Delta G^{353}$  -683.535185 Hartrees

|   |              |              |              |
|---|--------------|--------------|--------------|
| 1 | 0.668991000  | -1.861649000 | -1.757183000 |
| 1 | 1.024467000  | 0.477539000  | -1.699960000 |
| 6 | -0.613715000 | -0.090310000 | -0.432474000 |
| 6 | -1.352633000 | 1.044396000  | -0.741798000 |
| 6 | -1.213045000 | -1.125003000 | 0.276624000  |
| 6 | -2.676251000 | 1.145566000  | -0.349141000 |
| 6 | -2.538417000 | -1.025433000 | 0.664361000  |
| 6 | -3.271578000 | 0.109112000  | 0.353095000  |
| 1 | -0.880372000 | 1.861036000  | -1.301256000 |
| 1 | -0.624301000 | -2.014675000 | 0.524484000  |
| 1 | -3.253093000 | 2.041465000  | -0.600403000 |
| 1 | -3.005728000 | -1.844168000 | 1.221173000  |
| 1 | -4.320145000 | 0.185520000  | 0.658821000  |
| 6 | 0.829746000  | -0.202698000 | -0.839466000 |
| 6 | 1.747826000  | 0.291182000  | 0.265031000  |
| 8 | 1.242287000  | -1.496950000 | -1.082748000 |
| 9 | 3.011518000  | 0.226428000  | -0.098096000 |
| 9 | 1.617112000  | -0.414277000 | 1.367885000  |
| 9 | 1.480292000  | 1.548921000  | 0.556757000  |

## 2-acetylpyridine

$\Delta H^{353}$  -400.705156 Hartrees,  $\Delta S^{353}$  93.3 eu,  $\Delta G^{353}$  -400.757629 Hartrees

|   |              |              |             |
|---|--------------|--------------|-------------|
| 6 | 0.000000000  | 0.188618000  | 0.000000000 |
| 7 | -0.919031000 | -0.770471000 | 0.000000000 |
| 6 | 1.369269000  | -0.049369000 | 0.000000000 |
| 6 | -0.485131000 | -2.016746000 | 0.000000000 |
| 6 | 1.805549000  | -1.360606000 | 0.000000000 |
| 6 | 0.857081000  | -2.369724000 | 0.000000000 |
| 1 | 2.058397000  | 0.799581000  | 0.000000000 |
| 1 | -1.259222000 | -2.796162000 | 0.000000000 |
| 1 | 2.874585000  | -1.597113000 | 0.000000000 |
| 1 | 1.148692000  | -3.423785000 | 0.000000000 |
| 6 | -0.497640000 | 1.602709000  | 0.000000000 |
| 6 | -1.978114000 | 1.799459000  | 0.000000000 |
| 1 | -2.207037000 | 2.872768000  | 0.000000000 |

|   |              |             |              |
|---|--------------|-------------|--------------|
| 1 | -2.437764000 | 1.316688000 | 0.876194000  |
| 1 | -2.437764000 | 1.316688000 | -0.876194000 |
| 8 | 0.283406000  | 2.517323000 | 0.000000000  |

TS<sup>S</sup> Acpy

$\Delta H^{353}$  -2789.098644 Hartrees,  $\Delta S^{353}$  314.3 eu,  $\Delta G^{353}$  -2789.275459 Hartrees, 848i cm<sup>-1</sup>

|    |              |              |              |
|----|--------------|--------------|--------------|
| 1  | -6.362728000 | 1.297598000  | -1.986319000 |
| 1  | -5.756350000 | 0.929416000  | 2.248504000  |
| 1  | 3.231857000  | -1.179090000 | 3.613927000  |
| 6  | 2.784082000  | -0.286186000 | 4.074911000  |
| 6  | -1.262852000 | 1.701682000  | 0.145934000  |
| 15 | -1.186381000 | -1.074974000 | -0.000957000 |
| 6  | 2.357603000  | 2.366480000  | 0.751805000  |
| 1  | 0.185771000  | -3.456318000 | -0.692442000 |
| 1  | -3.119595000 | -2.733261000 | -4.307065000 |
| 6  | -4.013243000 | 0.717583000  | 1.017395000  |
| 7  | 0.182680000  | 1.496353000  | 0.104626000  |
| 1  | -4.016636000 | -1.951081000 | -0.197881000 |
| 6  | -2.584243000 | -3.377172000 | 3.088115000  |
| 1  | -0.755663000 | -2.386614000 | 2.576727000  |
| 6  | -6.214202000 | 1.124167000  | 0.153675000  |
| 6  | 1.458759000  | -1.968726000 | 1.132501000  |
| 1  | -2.981438000 | -1.130982000 | -2.453597000 |
| 6  | 3.007089000  | 0.987661000  | 3.282817000  |
| 6  | -2.294516000 | -2.021591000 | 1.110629000  |
| 6  | -2.306055000 | -1.992642000 | -2.462948000 |
| 6  | -3.890695000 | -3.645685000 | 2.728047000  |
| 6  | 0.871417000  | 2.612632000  | 0.747105000  |
| 1  | -2.165827000 | -3.801614000 | 4.005149000  |
| 1  | -4.517937000 | -4.278748000 | 3.362669000  |
| 6  | -5.362882000 | 0.926655000  | 1.227947000  |
| 25 | 0.797722000  | -0.354577000 | 0.778045000  |
| 1  | 2.544006000  | 2.237865000  | 4.970332000  |
| 15 | 2.673756000  | 0.724953000  | 1.472907000  |
| 1  | 0.474931000  | 2.704226000  | 1.777254000  |
| 1  | -7.282478000 | 1.287926000  | 0.321409000  |
| 1  | 1.712486000  | -0.497546000 | 4.209234000  |
| 6  | -4.349748000 | 0.919514000  | -1.339400000 |
| 1  | 2.438815000  | 3.101421000  | 3.431761000  |
| 1  | -1.819834000 | 0.588591000  | -1.587763000 |
| 6  | 2.245437000  | 2.130980000  | 3.913825000  |
| 6  | -1.793216000 | -2.571672000 | 2.285492000  |
| 1  | 4.086097000  | 1.239113000  | 3.345252000  |
| 6  | -3.603525000 | -2.333587000 | 0.741595000  |
| 6  | -3.487438000 | 0.699479000  | -0.272215000 |
| 1  | -3.942961000 | 0.955095000  | -2.357092000 |
| 8  | 1.904004000  | -3.012690000 | 1.340010000  |
| 6  | -2.015688000 | 0.525401000  | -0.495858000 |

|   |              |              |              |
|---|--------------|--------------|--------------|
| 6 | -1.378270000 | -2.175089000 | -1.443700000 |
| 6 | -5.702685000 | 1.123610000  | -1.131541000 |
| 1 | -1.540330000 | 1.748808000  | 1.219345000  |
| 6 | -0.650235000 | -4.207940000 | -2.518593000 |
| 1 | -1.627816000 | -4.715874000 | -4.368733000 |
| 1 | 0.645606000  | 3.568548000  | 0.236349000  |
| 1 | 1.157741000  | 1.959323000  | 3.913715000  |
| 1 | 2.704359000  | 2.320782000  | -0.298125000 |
| 1 | 0.010167000  | -5.079639000 | -2.534133000 |
| 6 | -1.561412000 | -4.004165000 | -3.540911000 |
| 6 | -0.557938000 | -3.299077000 | -1.481335000 |
| 1 | 3.218340000  | -0.188139000 | 5.083905000  |
| 1 | -3.353865000 | 0.542812000  | 1.876490000  |
| 6 | -2.390366000 | -2.897182000 | -3.508037000 |
| 1 | -5.424372000 | -3.346170000 | 1.245017000  |
| 1 | 2.896513000  | 3.198667000  | 1.235101000  |
| 6 | -4.397066000 | -3.124734000 | 1.548196000  |
| 6 | 4.364415000  | 0.303135000  | 0.859848000  |
| 1 | 5.529147000  | 1.860353000  | 1.870311000  |
| 6 | 4.964470000  | -0.904720000 | 1.542035000  |
| 6 | 5.333955000  | 1.462943000  | 0.859269000  |
| 1 | 4.293454000  | -1.777944000 | 1.530526000  |
| 1 | 4.181004000  | 0.016524000  | -0.184376000 |
| 1 | 5.888351000  | -1.203044000 | 1.018059000  |
| 1 | 5.247804000  | -0.703354000 | 2.589487000  |
| 1 | 4.998529000  | 2.302896000  | 0.231275000  |
| 1 | 6.308970000  | 1.135228000  | 0.458667000  |
| 1 | 0.495786000  | 1.507985000  | -0.880777000 |
| 6 | -1.712456000 | 2.990300000  | -0.501135000 |
| 6 | -2.546222000 | 3.867678000  | 0.176678000  |
| 6 | -1.326721000 | 3.296543000  | -1.802448000 |
| 6 | -2.993136000 | 5.028977000  | -0.429421000 |
| 6 | -1.766103000 | 4.461387000  | -2.404991000 |
| 6 | -2.602632000 | 5.328916000  | -1.722140000 |
| 1 | -2.858642000 | 3.626164000  | 1.199489000  |
| 1 | -0.653276000 | 2.623183000  | -2.349111000 |
| 1 | -3.653202000 | 5.708960000  | 0.116987000  |
| 1 | -1.449113000 | 4.696039000  | -3.425531000 |
| 1 | -2.950892000 | 6.247922000  | -2.202423000 |
| 6 | 0.001867000  | -0.057249000 | 2.334532000  |
| 1 | 1.479139000  | -0.433709000 | -0.821660000 |
| 6 | 1.801802000  | 0.206554000  | -2.326177000 |
| 6 | 3.261537000  | -0.178776000 | -2.329199000 |
| 7 | 3.577514000  | -1.453923000 | -2.141393000 |
| 6 | 4.201991000  | 0.813077000  | -2.580564000 |
| 6 | 4.858104000  | -1.766807000 | -2.153955000 |
| 6 | 5.539746000  | 0.465589000  | -2.596798000 |
| 1 | 3.858803000  | 1.836368000  | -2.751386000 |

|   |              |              |              |
|---|--------------|--------------|--------------|
| 6 | 5.881995000  | -0.853333000 | -2.362605000 |
| 1 | 5.094306000  | -2.825186000 | -1.983309000 |
| 1 | 6.311454000  | 1.218803000  | -2.785661000 |
| 1 | 6.924312000  | -1.181228000 | -2.353544000 |
| 6 | 0.946460000  | -0.709710000 | -3.154115000 |
| 8 | 1.528585000  | 1.418909000  | -2.294889000 |
| 1 | 1.095787000  | -1.774085000 | -2.939585000 |
| 1 | 1.223367000  | -0.530997000 | -4.209045000 |
| 1 | -0.113660000 | -0.444926000 | -3.049965000 |
| 8 | -0.578644000 | 0.202190000  | 3.301628000  |

TS<sup>R</sup> Acpy

$\Delta H^{353}$  -2789.096041 Hartrees,  $\Delta S^{353}$  312.5 eu,  $\Delta G^{353}$  -2789.271855 Hartrees, 558i cm<sup>-1</sup>

|    |              |              |              |
|----|--------------|--------------|--------------|
| 1  | 6.376552000  | -0.126208000 | -1.391662000 |
| 1  | 5.233707000  | -1.954172000 | 2.321496000  |
| 1  | -2.941096000 | -1.599485000 | 3.396703000  |
| 6  | -3.860620000 | -2.058631000 | 2.995603000  |
| 6  | 1.135448000  | -1.788470000 | -0.575796000 |
| 15 | 0.762935000  | 0.688851000  | 0.600457000  |
| 6  | -2.421417000 | -2.896142000 | -0.914955000 |
| 1  | -0.543129000 | 3.107789000  | 1.237135000  |
| 1  | 3.070203000  | 4.339959000  | -1.916714000 |
| 6  | 3.635242000  | -1.252111000 | 1.075730000  |
| 7  | -0.310629000 | -1.643754000 | -0.759792000 |
| 1  | 3.477561000  | 1.682830000  | 1.255308000  |
| 6  | 1.587428000  | 1.232565000  | 4.586568000  |
| 1  | -0.064732000 | 0.541653000  | 3.414655000  |
| 6  | 5.956668000  | -1.052767000 | 0.504735000  |
| 6  | -2.045432000 | 0.770183000  | 1.691229000  |
| 1  | 2.646924000  | 1.976329000  | -1.424118000 |
| 6  | -3.580574000 | -2.868255000 | 1.748955000  |
| 6  | 1.639673000  | 1.014762000  | 2.181352000  |
| 6  | 2.025186000  | 2.736186000  | -0.943204000 |
| 6  | 2.886680000  | 1.701786000  | 4.586639000  |
| 6  | -0.918446000 | -2.970074000 | -0.853085000 |
| 1  | 1.037142000  | 1.130677000  | 5.526420000  |
| 1  | 3.376703000  | 1.966839000  | 5.528275000  |
| 6  | 4.966230000  | -1.464910000 | 1.380448000  |
| 25 | -1.205086000 | -0.409209000 | 0.657183000  |
| 1  | -3.100168000 | -4.650888000 | 2.842674000  |
| 15 | -3.010986000 | -1.751629000 | 0.381717000  |
| 1  | -0.599947000 | -3.527057000 | 0.050059000  |
| 1  | 7.010196000  | -1.218278000 | 0.747573000  |
| 1  | -4.277658000 | -2.698470000 | 3.791060000  |
| 6  | 4.269371000  | -0.232657000 | -0.988644000 |
| 1  | -2.494327000 | -4.687130000 | 1.186699000  |
| 1  | 1.750432000  | 0.044903000  | -1.460020000 |
| 6  | -2.654164000 | -4.024870000 | 2.051575000  |

|   |              |              |              |
|---|--------------|--------------|--------------|
| 6 | 0.970036000  | 0.892387000  | 3.393708000  |
| 1 | -4.532847000 | -3.313973000 | 1.405462000  |
| 6 | 2.937310000  | 1.528988000  | 2.195734000  |
| 6 | 3.265343000  | -0.619890000 | -0.109105000 |
| 1 | 3.994680000  | 0.223413000  | -1.947096000 |
| 8 | -2.591218000 | 1.539886000  | 2.354473000  |
| 6 | 1.821438000  | -0.422723000 | -0.458448000 |
| 6 | 1.023432000  | 2.372136000  | -0.052997000 |
| 6 | 5.603515000  | -0.439532000 | -0.683846000 |
| 1 | 1.266080000  | -2.337102000 | 0.379755000  |
| 6 | 0.506255000  | 4.707563000  | 0.266052000  |
| 1 | 1.723820000  | 6.114515000  | -0.820239000 |
| 1 | -0.525486000 | -3.534990000 | -1.719866000 |
| 1 | -1.670286000 | -3.707141000 | 2.421525000  |
| 1 | -2.741484000 | -2.500624000 | -1.893870000 |
| 1 | -0.106296000 | 5.479992000  | 0.740510000  |
| 6 | 1.520478000  | 5.060291000  | -0.609353000 |
| 6 | 0.258131000  | 3.376585000  | 0.537576000  |
| 1 | -4.581561000 | -1.243107000 | 2.824216000  |
| 1 | 2.863772000  | -1.561504000 | 1.791516000  |
| 6 | 2.269933000  | 4.071805000  | -1.219989000 |
| 1 | 4.580947000  | 2.243725000  | 3.370986000  |
| 1 | -2.855393000 | -3.908710000 | -0.849552000 |
| 6 | 3.558730000  | 1.854601000  | 3.384697000  |
| 6 | -4.602728000 | -1.116430000 | -0.337400000 |
| 1 | -6.195956000 | -2.144275000 | 0.748077000  |
| 6 | -4.971138000 | 0.257359000  | 0.173152000  |
| 6 | -5.779723000 | -2.062177000 | -0.270100000 |
| 1 | -4.176048000 | 0.996716000  | -0.006127000 |
| 1 | -4.340591000 | -1.010401000 | -1.405839000 |
| 1 | -5.878929000 | 0.618720000  | -0.339645000 |
| 1 | -5.197998000 | 0.256398000  | 1.252617000  |
| 1 | -5.541182000 | -3.080445000 | -0.619983000 |
| 1 | -6.595254000 | -1.686756000 | -0.910532000 |
| 1 | -0.446281000 | -1.136378000 | -1.645881000 |
| 6 | 1.801304000  | -2.596512000 | -1.664209000 |
| 6 | 2.579344000  | -3.700507000 | -1.349144000 |
| 6 | 1.660197000  | -2.229935000 | -2.999165000 |
| 6 | 3.208898000  | -4.428866000 | -2.343776000 |
| 6 | 2.281774000  | -2.963034000 | -3.993814000 |
| 6 | 3.059057000  | -4.062837000 | -3.669319000 |
| 1 | 2.700478000  | -3.986669000 | -0.297618000 |
| 1 | 1.048402000  | -1.357799000 | -3.264472000 |
| 1 | 3.822716000  | -5.294810000 | -2.079089000 |
| 1 | 2.159623000  | -2.669078000 | -5.040726000 |
| 1 | 3.552501000  | -4.638474000 | -4.457754000 |
| 6 | -0.559209000 | -1.394479000 | 1.986762000  |
| 1 | -1.707084000 | 0.483525000  | -0.682619000 |



|   |              |              |              |
|---|--------------|--------------|--------------|
| 6 | -1.640653000 | 2.457294000  | -2.048065000 |
| 7 | -2.701275000 | 2.838148000  | -1.350107000 |
| 6 | -0.810809000 | 3.342840000  | -2.720798000 |
| 6 | -2.946995000 | 4.131894000  | -1.281980000 |
| 6 | -1.100038000 | 4.691596000  | -2.662483000 |
| 6 | -2.192070000 | 5.101822000  | -1.921468000 |
| 1 | 0.043374000  | 2.950994000  | -3.278070000 |
| 1 | -3.819390000 | 4.422402000  | -0.682220000 |
| 1 | -0.470520000 | 5.419727000  | -3.184181000 |
| 1 | -2.461253000 | 6.157530000  | -1.835533000 |
| 6 | -1.423121000 | 0.979508000  | -2.284716000 |
| 6 | -2.643620000 | 0.350258000  | -2.908547000 |
| 1 | -2.556721000 | -0.744010000 | -2.946850000 |
| 1 | -2.675775000 | 0.702471000  | -3.955726000 |
| 1 | -3.581530000 | 0.656190000  | -2.428453000 |
| 8 | -0.304358000 | 0.569876000  | -2.610595000 |
| 8 | -0.077388000 | -2.023239000 | 2.831394000  |

### 1-(2-pyridyl)-ethanol

$\Delta H^{353}$  -401.883311 Hartrees,  $\Delta S^{353}$  94.8 eu,  $\Delta G^{353}$  -401.936634 Hartrees

|   |              |              |              |
|---|--------------|--------------|--------------|
| 6 | -0.122156000 | -0.024000000 | -0.185332000 |
| 7 | 0.526281000  | -1.171471000 | -0.344995000 |
| 6 | 0.507315000  | 1.173142000  | 0.129876000  |
| 6 | 1.837272000  | -1.154460000 | -0.191792000 |
| 6 | 1.882755000  | 1.168500000  | 0.284984000  |
| 6 | 2.570246000  | -0.020519000 | 0.121437000  |
| 1 | -0.080832000 | 2.085835000  | 0.246085000  |
| 1 | 2.347450000  | -2.118004000 | -0.331391000 |
| 1 | 2.416010000  | 2.093063000  | 0.532650000  |
| 1 | 3.656838000  | -0.074697000 | 0.231850000  |
| 6 | -1.614037000 | -0.117532000 | -0.356716000 |
| 6 | -2.224132000 | -1.015337000 | 0.695115000  |
| 1 | -3.309085000 | -1.134296000 | 0.531061000  |
| 1 | -2.074653000 | -0.585163000 | 1.699478000  |
| 1 | -1.769429000 | -2.016793000 | 0.671596000  |
| 8 | -2.128036000 | 1.171071000  | -0.304319000 |
| 1 | -3.080026000 | 1.103762000  | -0.359784000 |
| 1 | -1.789534000 | -0.580742000 | -1.357462000 |

### 1-indanone

$\Delta H^{353}$  -422.770816 Hartrees,  $\Delta S^{353}$  93.8 eu,  $\Delta G^{353}$  -422.823591 Hartrees

|   |              |              |              |
|---|--------------|--------------|--------------|
| 8 | -2.168575000 | -1.657384000 | 0.000043000  |
| 6 | -1.554765000 | -0.626534000 | -0.000004000 |
| 6 | -2.151527000 | 0.769167000  | -0.000024000 |
| 1 | -2.809520000 | 0.875085000  | -0.877987000 |
| 1 | -2.809546000 | 0.875094000  | 0.877917000  |
| 6 | -0.091220000 | -0.463688000 | -0.000030000 |
| 6 | 0.235755000  | 0.886589000  | -0.000001000 |
| 6 | 0.883135000  | -1.453577000 | -0.000037000 |

|   |              |              |              |
|---|--------------|--------------|--------------|
| 6 | 1.567849000  | 1.271235000  | 0.000002000  |
| 6 | 2.208803000  | -1.067387000 | 0.000009000  |
| 6 | 2.542713000  | 0.286638000  | 0.000013000  |
| 1 | 0.591237000  | -2.509470000 | -0.000051000 |
| 1 | 1.849729000  | 2.330359000  | 0.000011000  |
| 1 | 3.004523000  | -1.819073000 | 0.000027000  |
| 1 | 3.599476000  | 0.575767000  | 0.000033000  |
| 6 | -0.987744000 | 1.747592000  | 0.000003000  |
| 1 | -0.997652000 | 2.415605000  | -0.879222000 |
| 1 | -0.997637000 | 2.415489000  | 0.879338000  |

TS<sup>S</sup> indanone

$\Delta H^{353}$  -2811.165657 Hartrees,  $\Delta S^{353}$  314.6 eu,  $\Delta G^{353}$  -2811.34266 Hartrees, 868i cm<sup>-1</sup>

|    |              |              |              |
|----|--------------|--------------|--------------|
| 1  | 6.118501000  | 1.545366000  | 2.236634000  |
| 1  | 5.821488000  | 1.370017000  | -2.042922000 |
| 1  | -1.689506000 | -1.245057000 | -4.163091000 |
| 6  | -2.777707000 | -1.092250000 | -4.087168000 |
| 6  | 1.079193000  | 1.767043000  | -0.378813000 |
| 15 | 1.289661000  | -0.955072000 | 0.067775000  |
| 6  | -2.570685000 | 1.999636000  | -1.146551000 |
| 1  | 1.360010000  | -3.742137000 | 0.510419000  |
| 1  | 2.123534000  | -1.711804000 | 4.954940000  |
| 6  | 3.995042000  | 1.097148000  | -0.951603000 |
| 7  | -0.341489000 | 1.407358000  | -0.335352000 |
| 1  | 4.150501000  | -1.528176000 | 0.488963000  |
| 6  | 3.142340000  | -3.189273000 | -2.842916000 |
| 1  | 1.178161000  | -2.417087000 | -2.490926000 |
| 6  | 6.124472000  | 1.479188000  | 0.085424000  |
| 6  | -1.126637000 | -2.272973000 | -1.135788000 |
| 1  | 1.810590000  | -0.264972000 | 3.011435000  |
| 6  | -3.110824000 | 0.252922000  | -3.473741000 |
| 6  | 2.552383000  | -1.825203000 | -0.937840000 |
| 6  | 1.800664000  | -1.346218000 | 2.866270000  |
| 6  | 4.441309000  | -3.292442000 | -2.384418000 |
| 6  | -1.120702000 | 2.391630000  | -1.079711000 |
| 1  | 2.843328000  | -3.686007000 | -3.770397000 |
| 1  | 5.182278000  | -3.862814000 | -2.952529000 |
| 6  | 5.354363000  | 1.323985000  | -1.054895000 |
| 25 | -0.739044000 | -0.554982000 | -0.885568000 |
| 1  | -2.753567000 | 1.296713000  | -5.321896000 |
| 15 | -2.707212000 | 0.256245000  | -1.663050000 |
| 1  | -0.684350000 | 2.447273000  | -2.096905000 |
| 1  | 7.200819000  | 1.655335000  | 0.003241000  |
| 1  | -3.184184000 | -1.159175000 | -5.110064000 |
| 6  | 4.158987000  | 1.195700000  | 1.429589000  |
| 1  | -2.759527000 | 2.371128000  | -3.919432000 |
| 1  | 1.615987000  | 0.915276000  | 1.475526000  |
| 6  | -2.461001000 | 1.368334000  | -4.260870000 |

|   |              |              |              |
|---|--------------|--------------|--------------|
| 6 | 2.206585000  | -2.462084000 | -2.124553000 |
| 1 | -4.208594000 | 0.394512000  | -3.540600000 |
| 6 | 3.858883000  | -1.974895000 | -0.467682000 |
| 6 | 3.376110000  | 1.024611000  | 0.293773000  |
| 1 | 3.684136000  | 1.157648000  | 2.416656000  |
| 8 | -1.366842000 | -3.394529000 | -1.265351000 |
| 6 | 1.909344000  | 0.763239000  | 0.421702000  |
| 6 | 1.587216000  | -1.894202000 | 1.607600000  |
| 6 | 5.521582000  | 1.415034000  | 1.329175000  |
| 1 | 1.374590000  | 1.726798000  | -1.447471000 |
| 6 | 1.659891000  | -4.098752000 | 2.600577000  |
| 1 | 1.988061000  | -4.179725000 | 4.728743000  |
| 1 | -1.018168000 | 3.403786000  | -0.643325000 |
| 1 | -1.361785000 | 1.313287000  | -4.235674000 |
| 1 | -3.015411000 | 2.061693000  | -0.136982000 |
| 1 | 1.597394000  | -5.184622000 | 2.484501000  |
| 6 | 1.876591000  | -3.539517000 | 3.848899000  |
| 6 | 1.526006000  | -3.284197000 | 1.493088000  |
| 1 | -3.182578000 | -1.943783000 | -3.518891000 |
| 1 | 3.407689000  | 0.938407000  | -1.863764000 |
| 6 | 1.952461000  | -2.164779000 | 3.973704000  |
| 1 | 5.815963000  | -2.780065000 | -0.806232000 |
| 1 | -3.137289000 | 2.709730000  | -1.771186000 |
| 6 | 4.795570000  | -2.687564000 | -1.189088000 |
| 6 | -4.308379000 | -0.229664000 | -0.887547000 |
| 1 | -5.797684000 | 0.728755000  | -2.178156000 |
| 6 | -4.717734000 | -1.650906000 | -1.195221000 |
| 6 | -5.458239000 | 0.722604000  | -1.128534000 |
| 1 | -3.895999000 | -2.373945000 | -1.071116000 |
| 1 | -4.060089000 | -0.179281000 | 0.184954000  |
| 1 | -5.532031000 | -1.963939000 | -0.519482000 |
| 1 | -5.104441000 | -1.756581000 | -2.223848000 |
| 1 | -5.230013000 | 1.761073000  | -0.842274000 |
| 1 | -6.326784000 | 0.413715000  | -0.521972000 |
| 1 | -0.617175000 | 1.416597000  | 0.659231000  |
| 6 | 1.351901000  | 3.164029000  | 0.124817000  |
| 6 | 2.027772000  | 4.082800000  | -0.663640000 |
| 6 | 0.935275000  | 3.544969000  | 1.397122000  |
| 6 | 2.287788000  | 5.359745000  | -0.196522000 |
| 6 | 1.187050000  | 4.823173000  | 1.860875000  |
| 6 | 1.865150000  | 5.733489000  | 1.066382000  |
| 1 | 2.362079000  | 3.784679000  | -1.664394000 |
| 1 | 0.398805000  | 2.828502000  | 2.033995000  |
| 1 | 2.825474000  | 6.072050000  | -0.829055000 |
| 1 | 0.851422000  | 5.113736000  | 2.860939000  |
| 1 | 2.065395000  | 6.743000000  | 1.436794000  |
| 6 | 0.053998000  | -0.280028000 | -2.450463000 |
| 1 | -1.548473000 | -0.620441000 | 0.623932000  |

|   |              |              |              |
|---|--------------|--------------|--------------|
| 6 | -1.489497000 | -0.241906000 | 2.172394000  |
| 6 | -2.901533000 | 0.232010000  | 2.328511000  |
| 6 | -3.758683000 | -0.846341000 | 2.504018000  |
| 6 | -3.367389000 | 1.532969000  | 2.364133000  |
| 6 | -5.113868000 | -0.632013000 | 2.682069000  |
| 6 | -4.724491000 | 1.749241000  | 2.537880000  |
| 1 | -2.663794000 | 2.369434000  | 2.264991000  |
| 6 | -5.589239000 | 0.671623000  | 2.689828000  |
| 1 | -5.802753000 | -1.472706000 | 2.821330000  |
| 1 | -5.120255000 | 2.768896000  | 2.574061000  |
| 1 | -6.657916000 | 0.857664000  | 2.835771000  |
| 6 | -1.558037000 | -1.699042000 | 2.640805000  |
| 8 | 0.575116000  | -0.042652000 | -3.455976000 |
| 6 | -2.994432000 | -2.123485000 | 2.417490000  |
| 1 | -3.111270000 | -2.561303000 | 1.403858000  |
| 1 | -3.349096000 | -2.889266000 | 3.125660000  |
| 1 | -1.329723000 | -1.676488000 | 3.724654000  |
| 1 | -0.825791000 | -2.359269000 | 2.165443000  |
| 8 | -0.527179000 | 0.524019000  | 2.331368000  |

### TS<sup>R</sup> indanone

$\Delta H^{353}$  -2811.152104 Hartrees,  $\Delta S^{353}$  312.0 eu,  $\Delta G^{353}$  -2811.327614 Hartrees, 1171i cm<sup>-1</sup>

|    |              |              |              |
|----|--------------|--------------|--------------|
| 1  | -6.302444000 | -0.464244000 | 1.677636000  |
| 1  | -5.140839000 | -2.845897000 | -1.700829000 |
| 1  | 3.848521000  | -1.550103000 | -3.194677000 |
| 6  | 3.508504000  | -2.564909000 | -2.944157000 |
| 6  | -0.963644000 | -1.709664000 | 0.827495000  |
| 15 | -0.897950000 | 0.536952000  | -0.801749000 |
| 6  | 2.712819000  | -2.238403000 | 1.236150000  |
| 1  | 0.480482000  | 2.942756000  | -1.444772000 |
| 1  | -3.794876000 | 4.326799000  | 0.640054000  |
| 6  | -3.575058000 | -1.750033000 | -0.728078000 |
| 7  | 0.457654000  | -1.381471000 | 0.905347000  |
| 1  | -3.746333000 | 0.980559000  | -1.571673000 |
| 6  | -1.769221000 | 0.235767000  | -4.797265000 |
| 1  | -0.047196000 | 0.011387000  | -3.547510000 |
| 6  | -5.872448000 | -1.690644000 | -0.037861000 |
| 6  | 1.901175000  | 0.713961000  | -1.956205000 |
| 1  | -3.195372000 | 1.947022000  | 0.563884000  |
| 6  | 3.616267000  | -2.912311000 | -1.470508000 |
| 6  | -1.815315000 | 0.443219000  | -2.389591000 |
| 6  | -2.506971000 | 2.684004000  | 0.137930000  |
| 6  | -3.123331000 | 0.501594000  | -4.860612000 |
| 6  | 1.238924000  | -2.561577000 | 1.261363000  |
| 1  | -1.198979000 | 0.050492000  | -5.711942000 |
| 1  | -3.636785000 | 0.521189000  | -5.826363000 |
| 6  | -4.885815000 | -2.157009000 | -0.890446000 |
| 25 | 1.176701000  | -0.346709000 | -0.721232000 |

|    |              |              |              |
|----|--------------|--------------|--------------|
| 1  | 3.319163000  | -5.002471000 | -1.864713000 |
| 15 | 3.105568000  | -1.493879000 | -0.380568000 |
| 1  | 0.988321000  | -3.364975000 | 0.542225000  |
| 1  | -6.909608000 | -2.012116000 | -0.168591000 |
| 1  | 2.471817000  | -2.652571000 | -3.300706000 |
| 6  | -4.220888000 | -0.422142000 | 1.149895000  |
| 1  | 3.019988000  | -4.583034000 | -0.174348000 |
| 1  | -1.745870000 | 0.199780000  | 1.390375000  |
| 6  | 2.904819000  | -4.220093000 | -1.206864000 |
| 6  | -1.122507000 | 0.206926000  | -3.572710000 |
| 1  | 4.688332000  | -3.074268000 | -1.232233000 |
| 6  | -3.174413000 | 0.747876000  | -2.475280000 |
| 6  | -3.224279000 | -0.864003000 | 0.287608000  |
| 1  | -3.952583000 | 0.239568000  | 1.982296000  |
| 8  | 2.392616000  | 1.404458000  | -2.739714000 |
| 6  | -1.795952000 | -0.460802000 | 0.497719000  |
| 6  | -1.317545000 | 2.276218000  | -0.457147000 |
| 6  | -5.534947000 | -0.824181000 | 0.986345000  |
| 1  | -1.076190000 | -2.435858000 | -0.004123000 |
| 6  | -0.817824000 | 4.580964000  | -0.957069000 |
| 1  | -2.292333000 | 6.031682000  | -0.360688000 |
| 1  | 0.956193000  | -2.939508000 | 2.262447000  |
| 1  | 1.828735000  | -4.161674000 | -1.433634000 |
| 1  | 2.910169000  | -1.478202000 | 2.013635000  |
| 1  | -0.137401000 | 5.327407000  | -1.377033000 |
| 6  | -2.014943000 | 4.973680000  | -0.383604000 |
| 6  | -0.470055000 | 3.243807000  | -0.989674000 |
| 1  | 4.110790000  | -3.266557000 | -3.544717000 |
| 1  | -2.808646000 | -2.111374000 | -1.424281000 |
| 6  | -2.851924000 | 4.023998000  | 0.174509000  |
| 1  | -4.892274000 | 0.991598000  | -3.733243000 |
| 1  | 3.317292000  | -3.123612000 | 1.498213000  |
| 6  | -3.823452000 | 0.762525000  | -3.694213000 |
| 6  | 4.739733000  | -0.643665000 | -0.158823000 |
| 1  | 5.944357000  | -2.365462000 | 0.435543000  |
| 6  | 5.438786000  | -0.336460000 | -1.464890000 |
| 6  | 5.671510000  | -1.357556000 | 0.793313000  |
| 1  | 4.802802000  | 0.223608000  | -2.167926000 |
| 1  | 4.472182000  | 0.333686000  | 0.274362000  |
| 1  | 6.323326000  | 0.290578000  | -1.266002000 |
| 1  | 5.805000000  | -1.240445000 | -1.979104000 |
| 1  | 5.253725000  | -1.470323000 | 1.805608000  |
| 1  | 6.615196000  | -0.795915000 | 0.896035000  |
| 1  | 0.591595000  | -0.711370000 | 1.687652000  |
| 6  | -1.511499000 | -2.364904000 | 2.073704000  |
| 6  | -2.161707000 | -3.587787000 | 1.995218000  |
| 6  | -1.398189000 | -1.740027000 | 3.311932000  |
| 6  | -2.693107000 | -4.181202000 | 3.127138000  |

|   |              |              |              |
|---|--------------|--------------|--------------|
| 6 | -1.922142000 | -2.337116000 | 4.444189000  |
| 6 | -2.572698000 | -3.556913000 | 4.355597000  |
| 1 | -2.260797000 | -4.079530000 | 1.020069000  |
| 1 | -0.875497000 | -0.778792000 | 3.394451000  |
| 1 | -3.206836000 | -5.143754000 | 3.047389000  |
| 1 | -1.819583000 | -1.840795000 | 5.413903000  |
| 1 | -2.988391000 | -4.024183000 | 5.253092000  |
| 6 | 0.589242000  | -1.612797000 | -1.811292000 |
| 1 | 1.647254000  | 0.807890000  | 0.599710000  |
| 6 | 1.188604000  | 2.658795000  | 2.021243000  |
| 6 | 2.221371000  | 3.494764000  | 1.612719000  |
| 6 | -0.028959000 | 3.168841000  | 2.426506000  |
| 6 | 2.026947000  | 4.862075000  | 1.561140000  |
| 6 | -0.213684000 | 4.539651000  | 2.402415000  |
| 6 | 0.802664000  | 5.376531000  | 1.961076000  |
| 1 | -0.813441000 | 2.493179000  | 2.787217000  |
| 1 | 2.835100000  | 5.533384000  | 1.250040000  |
| 1 | -1.163691000 | 4.971451000  | 2.732295000  |
| 1 | 0.640432000  | 6.459132000  | 1.949036000  |
| 6 | 1.691310000  | 1.258534000  | 2.155957000  |
| 6 | 3.199608000  | 1.472859000  | 2.237098000  |
| 8 | 1.097920000  | 0.387634000  | 2.816781000  |
| 8 | 0.144618000  | -2.466471000 | -2.452185000 |
| 6 | 3.463717000  | 2.694802000  | 1.384451000  |
| 1 | 4.382943000  | 3.242233000  | 1.646955000  |
| 1 | 3.550718000  | 2.410155000  | 0.314257000  |
| 1 | 3.388555000  | 1.726674000  | 3.298844000  |
| 1 | 3.795487000  | 0.578617000  | 2.022442000  |

### 1-indanol

$\Delta H^{353}$  -423.944064 Hartrees,  $\Delta S^{353}$  94.1 eu,  $\Delta G^{353}$  -423.996992 Hartrees

|   |              |              |              |
|---|--------------|--------------|--------------|
| 6 | 1.506836000  | -0.733866000 | 0.319895000  |
| 6 | 2.045023000  | 0.658651000  | 0.598020000  |
| 1 | 2.029644000  | 0.837490000  | 1.687202000  |
| 1 | 3.087749000  | 0.757894000  | 0.257634000  |
| 6 | 0.024354000  | -0.489584000 | 0.227163000  |
| 6 | -0.216049000 | 0.853508000  | -0.052862000 |
| 6 | -1.018369000 | -1.394976000 | 0.315607000  |
| 6 | -1.511338000 | 1.300544000  | -0.250671000 |
| 6 | -2.317246000 | -0.944635000 | 0.122590000  |
| 6 | -2.558244000 | 0.393059000  | -0.159727000 |
| 1 | -0.827541000 | -2.450181000 | 0.549215000  |
| 1 | -1.713928000 | 2.356333000  | -0.465914000 |
| 1 | -3.156888000 | -1.643158000 | 0.201288000  |
| 1 | -3.588237000 | 0.737528000  | -0.302584000 |
| 6 | 1.073388000  | 1.608848000  | -0.092365000 |
| 1 | 1.011815000  | 2.596277000  | 0.395518000  |
| 1 | 1.375578000  | 1.798592000  | -1.139704000 |

|   |             |              |              |
|---|-------------|--------------|--------------|
| 1 | 1.769775000 | -1.457784000 | 1.124438000  |
| 8 | 2.038115000 | -1.142482000 | -0.908604000 |
| 1 | 1.536989000 | -1.902434000 | -1.204153000 |

syn-FeHNNH

$\Delta H^{298}$  -2066.958492 Hartrees,  $\Delta S^{298}$  192.581 eu,  $\Delta G^{298}$  -2067.049994 Hartrees

|    |              |              |              |
|----|--------------|--------------|--------------|
| 17 | -0.052201000 | -2.085625000 | 1.108705000  |
| 26 | -0.011047000 | 0.069983000  | 0.009577000  |
| 1  | -0.001709000 | 1.391555000  | -0.742511000 |
| 6  | -0.022122000 | 0.922662000  | 1.549042000  |
| 8  | -0.027287000 | 1.476780000  | 2.553447000  |
| 7  | 0.010287000  | -0.892857000 | -1.796714000 |
| 1  | 0.020726000  | -0.124001000 | -2.472292000 |
| 6  | -1.199046000 | -1.653529000 | -2.059847000 |
| 1  | -1.241095000 | -2.475943000 | -1.323871000 |
| 1  | -1.169895000 | -2.108486000 | -3.069979000 |
| 6  | -2.376298000 | -0.726701000 | -1.920066000 |
| 1  | -3.327852000 | -1.260641000 | -2.069990000 |
| 1  | -2.316566000 | 0.041455000  | -2.709550000 |
| 15 | -2.244339000 | 0.078719000  | -0.284785000 |
| 6  | -3.153992000 | 1.686600000  | -0.411734000 |
| 1  | -4.226420000 | 1.456813000  | -0.263187000 |
| 6  | -3.010392000 | 2.357842000  | -1.758634000 |
| 1  | -3.525625000 | 1.816359000  | -2.565521000 |
| 1  | -1.953047000 | 2.481193000  | -2.051286000 |
| 1  | -3.450991000 | 3.368091000  | -1.717439000 |
| 6  | -2.716421000 | 2.631869000  | 0.687752000  |
| 1  | -3.358996000 | 3.527850000  | 0.695485000  |
| 6  | -3.313150000 | -0.993479000 | 0.772417000  |
| 1  | -2.870472000 | -1.994351000 | 0.594176000  |
| 6  | -4.774530000 | -1.036129000 | 0.387317000  |
| 1  | -5.274960000 | -1.869605000 | 0.907946000  |
| 1  | -4.946109000 | -1.182600000 | -0.690437000 |
| 1  | -5.305062000 | -0.116987000 | 0.686131000  |
| 6  | -3.163016000 | -0.681801000 | 2.243939000  |
| 1  | -3.627568000 | 0.284871000  | 2.502839000  |
| 1  | -2.108552000 | -0.657064000 | 2.558253000  |
| 1  | -3.671613000 | -1.449305000 | 2.851283000  |
| 6  | 1.215579000  | -1.668667000 | -2.038750000 |
| 1  | 1.200231000  | -2.116057000 | -3.052490000 |
| 1  | 1.230393000  | -2.496147000 | -1.307456000 |
| 6  | 2.400801000  | -0.759610000 | -1.863571000 |
| 1  | 2.382280000  | 0.015836000  | -2.653013000 |
| 1  | 3.352992000  | -1.298672000 | -1.981626000 |
| 15 | 2.226276000  | 0.104779000  | -0.261954000 |
| 6  | 2.985001000  | 1.742250000  | -0.656221000 |
| 1  | 2.319476000  | 2.107350000  | -1.465267000 |
| 6  | 2.904874000  | 2.725440000  | 0.487376000  |

|   |              |              |              |
|---|--------------|--------------|--------------|
| 1 | 3.576786000  | 2.443143000  | 1.315309000  |
| 1 | 1.885502000  | 2.820619000  | 0.895270000  |
| 1 | 3.218325000  | 3.727989000  | 0.152640000  |
| 6 | 4.391928000  | 1.670142000  | -1.204837000 |
| 1 | 4.695661000  | 2.656914000  | -1.592243000 |
| 1 | 4.498207000  | 0.951410000  | -2.032329000 |
| 1 | 5.126805000  | 1.398423000  | -0.429635000 |
| 6 | 3.414780000  | -0.688205000 | 0.916608000  |
| 1 | 4.399002000  | -0.213779000 | 0.731451000  |
| 6 | 3.002901000  | -0.393886000 | 2.343932000  |
| 1 | 2.046726000  | -0.888194000 | 2.582142000  |
| 1 | 2.880791000  | 0.681627000  | 2.547322000  |
| 1 | 3.763751000  | -0.773650000 | 3.046517000  |
| 6 | 3.571469000  | -2.178421000 | 0.712931000  |
| 1 | 4.265876000  | -2.582622000 | 1.469071000  |
| 1 | 3.988364000  | -2.438614000 | -0.271459000 |
| 1 | 2.610911000  | -2.703611000 | 0.832286000  |
| 1 | -1.679744000 | 2.974244000  | 0.527914000  |
| 1 | -2.764843000 | 2.185664000  | 1.693162000  |

## TSFe

$\Delta H^{298}$  -2066.904560 Hartrees,  $\Delta S^{298}$  193.18 eu,  $\Delta G^{298}$  -2066.996348 Hartrees, 400i cm<sup>-1</sup>

|    |    |   |           |           |           |
|----|----|---|-----------|-----------|-----------|
| 1  | 17 | 0 | -0.038941 | -1.780584 | -1.782843 |
| 2  | 26 | 0 | -0.023510 | -0.365862 | 0.050392  |
| 3  | 1  | 0 | -0.029978 | 0.761109  | 1.059455  |
| 4  | 6  | 0 | -0.022540 | -1.546760 | 1.329105  |
| 5  | 8  | 0 | -0.014441 | -2.346109 | 2.148431  |
| 6  | 7  | 0 | 0.003786  | 1.922501  | -1.579195 |
| 7  | 1  | 0 | 0.012575  | 1.225581  | -0.839774 |
| 8  | 6  | 0 | -1.172661 | 2.660347  | -1.197904 |
| 9  | 1  | 0 | -1.365325 | 3.451072  | -1.944276 |
| 10 | 1  | 0 | -1.055088 | 3.170047  | -0.214403 |
| 11 | 6  | 0 | -2.339612 | 1.691428  | -1.183319 |
| 12 | 1  | 0 | -2.443356 | 1.270962  | -2.201359 |
| 13 | 1  | 0 | -3.282252 | 2.225315  | -0.974852 |
| 14 | 15 | 0 | -2.215881 | 0.214361  | -0.070406 |
| 15 | 6  | 0 | -3.050450 | 0.723545  | 1.499862  |
| 16 | 1  | 0 | -4.137732 | 0.632630  | 1.304826  |
| 17 | 6  | 0 | -2.768999 | 2.155150  | 1.895668  |
| 18 | 1  | 0 | -3.116828 | 2.890426  | 1.155158  |
| 19 | 1  | 0 | -1.692870 | 2.327151  | 2.067965  |
| 20 | 1  | 0 | -3.285440 | 2.382964  | 2.843017  |
| 21 | 6  | 0 | -2.686975 | -0.199525 | 2.642895  |
| 22 | 1  | 0 | -3.326472 | 0.009865  | 3.516140  |
| 23 | 6  | 0 | -3.390373 | -0.932767 | -0.906463 |
| 24 | 1  | 0 | -2.864359 | -1.137198 | -1.860694 |
| 25 | 6  | 0 | -4.753262 | -0.362224 | -1.222815 |
| 26 | 1  | 0 | -5.341907 | -1.101816 | -1.791115 |



|    |    |   |           |           |           |
|----|----|---|-----------|-----------|-----------|
| 27 | 1  | 0 | -4.711102 | 0.551433  | -1.834222 |
| 28 | 1  | 0 | -5.332178 | -0.132779 | -0.312916 |
| 29 | 6  | 0 | -3.512133 | -2.240015 | -0.157524 |
| 30 | 1  | 0 | -4.107305 | -2.126357 | 0.764455  |
| 31 | 1  | 0 | -2.530129 | -2.658687 | 0.120334  |
| 32 | 1  | 0 | -4.027611 | -2.990449 | -0.778778 |
| 33 | 6  | 0 | 1.294709  | 2.528774  | -1.368085 |
| 34 | 1  | 0 | 1.355075  | 3.089234  | -0.404968 |
| 35 | 1  | 0 | 1.491387  | 3.258420  | -2.172761 |
| 36 | 6  | 0 | 2.328363  | 1.419885  | -1.421743 |
| 37 | 1  | 0 | 3.350583  | 1.831853  | -1.449747 |
| 38 | 1  | 0 | 2.187211  | 0.872771  | -2.370785 |
| 39 | 15 | 0 | 2.188699  | 0.173571  | -0.065994 |
| 40 | 6  | 0 | 2.820216  | 1.095125  | 1.405911  |
| 41 | 1  | 0 | 2.011950  | 1.824920  | 1.609943  |
| 42 | 6  | 0 | 2.936919  | 0.187414  | 2.609130  |
| 43 | 1  | 0 | 3.759091  | -0.539424 | 2.494197  |
| 44 | 1  | 0 | 2.011923  | -0.378824 | 2.807686  |
| 45 | 1  | 0 | 3.157536  | 0.779211  | 3.512055  |
| 46 | 6  | 0 | 4.102008  | 1.863963  | 1.183698  |
| 47 | 1  | 0 | 4.418306  | 2.336349  | 2.128568  |
| 48 | 1  | 0 | 3.994100  | 2.671658  | 0.444739  |
| 49 | 1  | 0 | 4.935039  | 1.218640  | 0.857982  |
| 50 | 6  | 0 | 3.496868  | -1.082616 | -0.429849 |
| 51 | 1  | 0 | 4.420217  | -0.720632 | 0.065470  |
| 52 | 6  | 0 | 3.111892  | -2.410364 | 0.189177  |
| 53 | 1  | 0 | 2.212172  | -2.822911 | -0.297250 |
| 54 | 1  | 0 | 2.901321  | -2.338394 | 1.267981  |
| 55 | 1  | 0 | 3.928552  | -3.140552 | 0.063768  |
| 56 | 6  | 0 | 3.788469  | -1.248898 | -1.903507 |
| 57 | 1  | 0 | 4.529287  | -2.053692 | -2.043701 |
| 58 | 1  | 0 | 4.206294  | -0.340578 | -2.362661 |
| 59 | 1  | 0 | 2.884991  | -1.534144 | -2.467438 |
| 60 | 1  | 0 | -1.642996 | -0.037507 | 2.960920  |
| 61 | 1  | 0 | -2.799297 | -1.267713 | 2.402687  |

*anti*-FeHNNH

$\Delta H^{298}$  -2066.963511 Hartrees,  $\Delta S^{298}$  191.677 eu,  $\Delta G^{298}$  -2067.054583 Hartrees

|    |              |              |              |
|----|--------------|--------------|--------------|
| 17 | -0.003037000 | 1.997940000  | -1.378635000 |
| 26 | 0.020906000  | 0.030080000  | 0.036237000  |
| 1  | 0.021794000  | -1.275438000 | 0.805528000  |
| 6  | 0.056569000  | 0.905649000  | 1.560324000  |
| 8  | 0.091026000  | 1.442696000  | 2.574023000  |
| 7  | 0.000411000  | -1.038408000 | -1.701560000 |
| 1  | 0.059966000  | -0.278871000 | -2.389841000 |
| 6  | 1.154003000  | -1.898707000 | -1.905715000 |
| 1  | 1.137200000  | -2.346543000 | -2.919269000 |
| 1  | 1.077044000  | -2.732004000 | -1.183899000 |

|    |              |              |              |
|----|--------------|--------------|--------------|
| 6  | 2.411794000  | -1.104028000 | -1.687366000 |
| 1  | 2.515169000  | -0.351992000 | -2.492229000 |
| 1  | 3.308354000  | -1.742184000 | -1.738971000 |
| 15 | 2.248837000  | -0.184998000 | -0.120038000 |
| 6  | 3.156872000  | -1.189800000 | 1.138776000  |
| 1  | 4.234988000  | -1.010321000 | 0.956918000  |
| 6  | 2.911190000  | -2.676081000 | 1.007930000  |
| 1  | 3.224422000  | -3.086441000 | 0.036073000  |
| 1  | 1.848601000  | -2.929978000 | 1.159520000  |
| 1  | 3.483258000  | -3.213616000 | 1.782670000  |
| 6  | 2.820305000  | -0.740132000 | 2.544086000  |
| 1  | 3.460908000  | -1.261719000 | 3.274338000  |
| 6  | 3.308429000  | 1.288972000  | -0.446144000 |
| 1  | 2.823216000  | 1.700585000  | -1.353431000 |
| 6  | 4.747855000  | 0.971102000  | -0.778490000 |
| 1  | 5.253117000  | 1.871658000  | -1.166017000 |
| 1  | 4.852329000  | 0.187103000  | -1.545498000 |
| 1  | 5.316839000  | 0.649142000  | 0.109238000  |
| 6  | 3.216590000  | 2.344801000  | 0.630007000  |
| 1  | 3.730230000  | 2.037236000  | 1.556083000  |
| 1  | 2.173447000  | 2.594015000  | 0.882024000  |
| 1  | 3.703361000  | 3.275057000  | 0.292754000  |
| 6  | -1.233941000 | -1.756604000 | -1.973489000 |
| 1  | -1.279192000 | -2.619666000 | -1.282098000 |
| 1  | -1.232720000 | -2.169948000 | -3.001305000 |
| 6  | -2.396538000 | -0.826154000 | -1.762136000 |
| 1  | -3.358883000 | -1.321418000 | -1.964742000 |
| 1  | -2.313358000 | 0.016162000  | -2.471474000 |
| 15 | -2.223480000 | -0.159394000 | -0.077854000 |
| 6  | -2.947782000 | -1.473760000 | 0.999464000  |
| 1  | -2.236140000 | -2.316147000 | 0.889216000  |
| 6  | -2.925004000 | -1.036064000 | 2.447042000  |
| 1  | -3.637363000 | -0.213915000 | 2.634632000  |
| 1  | -1.927208000 | -0.695706000 | 2.770702000  |
| 1  | -3.217601000 | -1.868913000 | 3.106905000  |
| 6  | -4.320993000 | -1.962877000 | 0.603314000  |
| 1  | -4.655242000 | -2.745669000 | 1.304784000  |
| 1  | -4.344919000 | -2.406325000 | -0.403199000 |
| 1  | -5.081446000 | -1.164906000 | 0.637332000  |
| 6  | -3.420102000 | 1.246615000  | 0.079645000  |
| 1  | -4.334714000 | 0.816790000  | 0.534411000  |
| 6  | -2.882571000 | 2.300502000  | 1.023280000  |
| 1  | -1.965780000 | 2.761301000  | 0.619055000  |
| 1  | -2.642286000 | 1.896724000  | 2.019545000  |
| 1  | -3.628518000 | 3.100499000  | 1.165747000  |
| 6  | -3.811977000 | 1.860887000  | -1.244247000 |
| 1  | -4.510091000 | 2.697523000  | -1.072682000 |
| 1  | -4.319752000 | 1.146564000  | -1.910516000 |

|   |              |              |              |
|---|--------------|--------------|--------------|
| 1 | -2.938139000 | 2.266920000  | -1.779931000 |
| 1 | 1.774513000  | -0.985718000 | 2.796255000  |
| 1 | 2.953041000  | 0.340333000  | 2.705447000  |

## References

1. W. L. F. Armarego and C. L. L. Chai, in *Purification of Laboratory Chemicals (Sixth Edition)*, eds. W. L. F. Armarego and C. L. L. Chai, Elsevier, Oxford, 2009, DOI: 10.1016/B978-1-85617-567-8.50012-3, pp. 88-444.
2. W. L. F. Armarego and C. L. L. Chai, in *Purification of Laboratory Chemicals (Sixth Edition)*, eds. W. L. F. Armarego and C. L. L. Chai, Elsevier, Oxford, 2009, DOI: 10.1016/B978-1-85617-567-8.50013-5, pp. 445-576.
3. S. A. M. Smith, P. O. Lagaditis, A. Lüpke, A. J. Lough and R. H. Morris, *Chem. Eur. J.*, 2017, 23, 7212-7216.
4. M. J. Frisch, G. W. Trucks, H. B. Schlegel, G. E. Scuseria, M. A. Robb, J. R. Cheeseman, G. Scalmani, V. Barone, B. Mennucci, G. A. Petersson, H. Nakatsuji, M. Caricato, X. Li, H. P. Hratchian, A. F. Izmaylov, J. Bloino, G. Zheng, J. L. Sonnenberg, M. Hada, M. Ehara, K. Toyota, R. Fukuda, J. Hasegawa, M. Ishida, T. Nakajima, Y. Honda, O. Kitao, H. Nakai, T. Vreven, J. A. Montgomery, J. E. Peralta, F. Ogliaro, M. Bearpark, J. J. Heyd, E. Brothers, K. N. Kudin, V. N. Staroverov, R. Kobayashi, J. Normand, K. Raghavachari, A. Rendell, J. C. Burant, S. S. Iyengar, J. Tomasi, M. Cossi, N. Rega, J. M. Millam, M. Klene, J. E. Knox, J. B. Cross, V. Bakken, C. Adamo, J. Jaramillo, R. Gomperts, R. E. Stratmann, O. Yazyev, A. J. Austin, R. Cammi, C. Pomelli, J. W. Ochterski, R. L. Martin, K. Morokuma, V. G. Zakrzewski, G. A. Voth, P. Salvador, J. J. Dannenberg, S. Dapprich, A. D. Daniels, Ö. Farkas, J. B. Foresman, J. V. Ortiz, J. Cioslowski and D. J. Fox, 2009, Gaussian 09 Revision D.01.
5. D. G. Gusev and D. M. Spasyuk, *ACS Catal.*, 2018, 8, 6851-6861.
6. Luchini, G.; Alegre-Requena, J. V.; Fuenes-Ardoiz, I.; Paton, R. S. *GoodVibes: automated thermochemistry for heterogeneous computational chemistry data. F1000 Research*, 2020, 9, 291. DOI: [10.12688/f1000research.22758.1](https://doi.org/10.12688/f1000research.22758.1)
